## Index of Participants

Arabic numbers refer to session numbers

A dot (•) indicates a Fellow of the Society

Duplicate numbers indicate the participant is listed as an author on multiple abstracts within a session.

### A

- Aaltonen, Mari, 845  
Aaron, Charlene, 555  
Aartsen, Marja, 655, 1725, 2155  
Abadir, Peter, 100  
Abbas, Yasmin, 1820  
Abbott, Katherine, 450, 2150  
Abdou, Cleopatra, 25  
Abe, Takumi, 265, 1660  
Abner, Erin, 272  
Abney, Regina, 225, 630  
Aboseif, Albert, 1630  
Abrahamson, Kathleen, 1465, 1585  
Abramson, Tobi, 610  
AbuDagga, Azza, 1690  
Acevedo, Andrea, 1820  
Acharya, Nimish, 965  
Achor, Deanna, 505  
Achterberg, Wilco, 245  
Adamek, Margaret, 1690  
Adams, Anne, 555, 1620  
Adams, Kathryn, 605, 1655  
Adams, Robert, 235  
Adams, Scott, 325  
Adamson, Ashley, 135, 910  
Adams-Price, Carolyn, 1495  
Adelman, Toby, 205  
Adkison, Lesley, 1690  
Adler, Efrat, 1265  
Adriaensen, Wim, 1670  
Afendulis, Christopher, 940  
Aggarwal, Neelum, 1390  
Agnes, Sabrina, 625  
• Agree, Emily, 495, 600, 1685, 2130  
Agrigoroaei, Stefan, 230  
Aguar, Bruno, 635  
Aguinaga, Susan, 615, 1125  
Aguirre, Maria, 965  
Ahn, Hyochol, 1045  
Ahn, SangNam, 205, 220, 1655, 1845  
Ahn, Suran, 1050  
Aichele, Stephen, 890  
Aida, Jun, 1000  
Aiello, Allison, 75  
Aiken-Morgan, Adrienne, 215, 300, 1640  
Ailshire, Jennifer, 725, 845, 1010, 1880, 2170, 2225  
Aizenstein, Howard, 965, 1360, 1660  
• Ajrouch, Kristine, 130, 680  
Akincigil, Ayse, 705  
Akiyama, Hiroko, 275, 290, 590, 1050  
Akushevich, Igor, 385, 1060, 2195  
Alagiakrishnan, Kannayiram, 1025  
Albala, Cecilia, 272, 970, 1015, 1030  
Albatineh, Ahmed, 880  
Albert, Jeffrey, 1725  
Albert, Marilyn, 230, 625, 775, 1930  
• Albert, Steven, 715  
Albitz, Casey, 1630  
Albrecht, Jennifer, 1020, 1920  
Albrektson, Keith, 272  
Albright, David, 510, 595, 1515  
Alden, Richard, 965  
Alderden, Jenny, 525  
Aldredge, Patti, 655  
Aldridge, Melissa, 1140  
• Aldwin, Carolyn, 1085, 1095, 1640, 1645, 2250  
Alecxih, Lisa, 2210  
Alemán-de la Torre, Laura, 590, 1625  
• Alessi, Cathy, 1910  
Alexander, G., 1555  
Alexander, Gregory, 1415  
Alexander, Linda, 1745  
Alexander, Neil, 235  
Alexandrov, Eugene, 1785  
Alhabash, Saleem, 2160  
Alkema, Gretchen, 930  
Allaire, Jason, 215, 230, 300  
• Allen, Katherine, 1535  
Allen, Mark, 10  
Allen, Norrina, 170  
Allen, Pamela, 295, 630  
Allen, Phyllicia, 1840  
• Allen, Rebecca, 215, 220, 245, 995, 1040, 1495, 2200  
Allen, Shauntice, 385  
• Allen, Susan, 1445  
Allen, Victoria, 520  
• Allison, David, 1480  
Allison, Theresa, 1455  
• Allman, Richard, 1295, 1965, 1995  
Allore, Heather, 385, 770  
Allsopp, Richard, 965  
• Almeida, David, 220, 305, 675, 840, 850, 1620, 1630, 1640, 1660, 1770, 2030, 2175, 2255  
Almeida, Nely, 980  
Alonzi, Dana, 110, 915, 1345  
Alpass, Fiona, 245, 1495, 2145  
• Al Snih, Soham, 650, 1195, 1665  
Alston, Gayle, 225  
Altman, Nancy, 1320  
• Altpeter, Mary, 1845, 2230  
Alvarez, Kimberly, 1045, 1430  
Alvarez, Paula, 1210  
Alves, Talita, 1660  
Amann, Markus, 1130  
Amano, Hidenori, 270, 272, 1015  
Amano, Takashi, 1520  
Ambergen, Ton, 320  
Amin, Alpesh, 1820  
Amini, Reza, 2175  
Amiot, Elizabeth, 925  
An, Hong, 20, 345, 1535  
An, Sok, 245  
An, Yang, 210  
Anat, Mike, 272  
• Ancoli-Israel, Sonia, 715, 2060  
• An del, Ross, 610  
Andersen, Daniel, 2100  
Andersen, Stacy, 230, 620, 990, 1650  
Andersen, Troy, 60, 210  
Andersen-Ranberg, Karen, 360, 1065  
Anderson, Connie, 1650  
Anderson, Gerard, 1110  
Anderson, Joel, 1900  
Anderson, Keith, 610, 1755, 2180  
Anderson, Lynda, 60, 1625  
Anderson, Nicole, 630  
Anderson, Rozalyn, 585  
Anderson, Ruth, 765, 905  
Anderson, Ryan, 1690  
Anderson, Stewart, 1250  
Anderson, Wayne, 2310  
Anderson, William, 720, 2160  
Andrade, Daniela, 1050  
Andrade, Flavia, 1125  
André, Helô, 965, 1575  
André, Towe, 245  
Andreolletti, Carrie, 665, 1635  
Andrews, Ron, 265  
• Anetzberger, Georgia, 185  
Angel, Barbara, 272, 1015, 1030  
• Angel, Jacqueline, 45, 510, 600  
Angel, Ronald, 1740, 1865  
Angleman, Sara, 2275  
Annoni, Giorgio, 1025, 1150  
• Ansello, Edward, 665, 895, 1635, 1905  
• Anstey, Kaarin, 30, 965, 1235  
Antenucci, Vincent, 210  
Antonelli, Humberto, 1530  
Antonelli Incalzi, Raffaele, 1430  
• Antonucci, Toni, 35, 115, 130, 590, 605, 680, 1075, 1355  
Apesoa-Varano, E, 2050  
Aponte, Daniel, 230  
Apple, Katie, 975  
Applebaum, Robert, 575, 1980  
Arai, Yasumichi, 272, 290, 610, 615, 1150, 1360, 2015  
Araiza, Daniel, 650, 1055  
• Aranda, Maria, 660, 1370  
Araujo, Andre, 1550  
Araújo, Lia, 260, 1665, 2015  
Arayama, Naoko, 1660  
Arbeev, Konstantin, 385, 965, 1060, 1145, 2195  
Arbeeva, Liubov, 1060  
Arbogast, Annabelle, 250  
• Ardel, Monika, 1085, 2250  
Arentoft, Alyssa, 2265  
Arias-Merino, Elva, 590, 990, 1625, 1635  
• Arling, Greg, 1465  
Armenta, Claudia, 245  
Armento, Maria, 1370  
Armour, Brian, 2310  
Armstrong, Nicole, 1020  
Arnardottir, Nanna, 585, 1925  
Arnold, Alice, 170  
Arpawong, Thalida, 1290  
Arránz Becker, Oliver, 820  
Arruda, Elizabeth, 645  
Arsenault, Kendra, 1115, 1260, 1650  
Artaud, Fanny, 2080  
Arthur, Antony, 1235  
Arthur, Paul, 210, 915  
Asaka, Meiko, 265  
Asare, Gifty, 230  
Asbrand, Christian, 585  
Aschenbrenner, Andrew, 225, 1005  
Ashby-Mitchell, Kimberly, 1235  
Ashe, Maureen, 265  
Asherson, Philp, 310  
Ashida, Sato, 1765  
• Ashton-Miller, James, 925  
Aspelund, Thor, 1565  
Atanous, Annette, 1995  
Atwood, Craig, 1380  
Atzmon, Gil, 475  
Au, Alma, 485  
Aubertin-Leheudre, Mylene, 265  
Aubrecht, Katie, 1055  
Auerbach, Heidi, 1635  
August, Kristin, 615  
Ault, Kimberly, 2310  
AUSQoL Group, 1430  
Ausserhofer, Dietmar, 545  
• Austad, Steven, 265  
Austin, Daniel, 50, 1415  
Austin, Kathy, 1645  
Austin-Ketch, Tammy, 220  
Avioli, Paula, 330  
Avlund, Kirsten, 2195  
Awata, Shuichi, 272, 625, 985  
Ayonayon, Hilsa, 1785  
Ayotte, Brian, 970, 2030  
Azevedo, Maria, 260, 1665  
Azhar, Gohar, 585  
Azuelo, Andres, 630

Azuero, Casey, 1630

## B

- Baan, Caroline, 1420
- Baars, Jan, 690, 1340, 2025
  - Babatunde, Oyinlola, 980
  - Baca, Beth, 1685
  - Baccarelli, Andrea, 1550
  - Baccini, Marco, 1665
  - Bach, Eileen, 800
  - Backhaus, Ramona, 420, 545
  - Backman, Annica, 545
  - Bacon, Kathryn, 225
  - Bader, Michael, 2225
  - Bae, Harold, 1145
  - Bae, Sejong, 1630
  - Bae, Yeonji, 660
  - Baek, Francis, 925
  - Baek, Jiwon, 1625
  - Baek, YouSun, 1645
  - Baer, Alan, 1035
  - Baer, Alyssa, 210
  - Bai, Jiawei, 1780
  - Bai, Xiaojuan, 272, 650, 1035, 1695
  - Baier, Rosa, 1820
  - Bail, Zane, 1635
  - Bailey, Donald, 995
  - Bailey, F., 1945
  - Bailey, Kathleen, 655
  - Bailey, Linda, 335
  - Bailey-Addison, Karen, 1390
  - Bailey Fausset, Cara, 1415
  - Bain, Natalie, 1625
  - Bajnok, Irmajean, 1675
  - Bajpai, Swamini, 205
  - Baker, Lindsey, 10
  - Baker, Tamara, 215, 610
  - Bakitas, Marie, 1630
  - Bakk, Louanne, 95, 280, 660, 1055
  - Balaszamy, Shantha, 660
  - Baldwin, Candace, 1975
  - Ballabh, Praveen, 965
  - Balsis, Steve, 1520
  - Bamman, Marcas, 670
  - Bamonti, Patricia, 610
  - Bandeem-Roche, Karen, 845, 1555
  - Bandinelli, Stefania, 535, 1665
  - Banerjee, Tanvi, 635
  - Bang, Hwal, 2290
  - Bangalore, Sai, 1480
  - Bangerter, Lauren, 1240, 2030
  - Banks, Richard, 1025
  - Bann, David, 650
  - Bao, Luoman, 195
  - Baptista, Fátima, 965
  - Barba, Beth, 1905
  - Barba, Brittany, 650
  - Barba, Kate, 1030
  - Barbat-Artigas, Sebastien, 265
  - Barczy, Steven, 365, 1945
  - Bardo, Anthony, 600, 1010, 2040, 2105
  - Barker, Alyse, 625
  - Barnato, Amber, 1295
  - Barnes, Emily, 220
  - Barnes, Kaitlyn, 705, 990, 1000, 1510, 1650
  - Barnes, Lisa, 235, 1390
  - Barnett, Amanda, 1650
  - Barooah, Adrita, 610, 1140
  - Barr, Robin, 1545
  - Barr, Taura, 220
  - Barragan, Noel, 280, 1020, 1050
  - Barredo, Ronald, 640
  - Barreto, Hellen, 1660
  - Barrett, Anne, 1010
  - Barrett, Sandra, 2115
  - Barrett-Connor, Elizabeth, 2060
  - Barretto, Tina, 2295
  - Barrett-O'Keefe, Zachary, 1130
  - Barrineau, Mary, 2240
  - Barrón, Yolanda, 800, 1655, 1845
  - Barry, Lisa, 1540, 1690, 1895
  - Bartali, Benedetta, 1550
  - Bartels, Stephen, 1025
  - Bartlett, Helen, 660
  - Bartlo, Wendy, 995
  - Bartolucci, Alfred, 1480
  - Barton, Kelli, 280, 1365
  - Barton, Scott, 1615
  - Barzilai, Nir, 475, 1695
  - Basilio, Cecille, 260, 645, 650
  - Bass, David, 345, 1395, 1580, 2180
  - Bassett, Candace, 1615
  - Bastings, Loes, 1420
  - Batemon, Patricia, 410
  - Batsis, John, 650, 1025
  - Battle, Danielle, 505
  - Bauer, Douglas, 1785
  - Bauer, Laura, 225
  - Baum, Carolyn, 1470
  - Baumbusch, Jennifer, 1155
  - Baur, Joseph, 1475
  - Bautmans, Ivan, 2195
  - Baxter, Donna, 1685
  - Bazile, Yamilee, 1965, 2280
  - Beach, Scott, 1105, 1580, 2270
  - Beals, Michaela, 1395
  - Beamish, Julia, 425, 990
  - Bean, Jonathan, 520, 1560, 1675, 2070
  - Bean, Shannon, 165
  - Bear-Lehman, Jane, 80
  - Beard, John, 1740
  - Beattie, Elizabeth, 1430
  - Beauchamp, Marla, 1560
  - Beaudoin, Christopher, 2230
  - Beaudreau, Sherry, 1370
  - Beaulac, Claude, 875
  - Beaulieu, Marie, 1610
  - Beaver, Kristine, 595
  - Beavers, Daniel, 965, 1015
  - Beavers, Kristen, 1015
  - Beck, Cornelia, 2270
  - Beck, Jim, 1015, 2090
  - Beck, Patrick, 580
  - Beck, Susan, 665
  - Becker, Clemens, 320, 1670
  - Becker, David, 1535
  - Becker, Emily, 990
  - Becker, Marion, 610
  - Becker, Sandra, 1490
  - Bédard, Marie-Michèle, 875
  - Bedard, Michel, 975, 1525
  - Bedford, Victoria, 35, 330
  - Beehler, Sarah, 1325
  - Beer, Jenay, 1620
  - Beerens, Hanneke, 210
  - Beeson, Tishra, 345, 505
  - Behrens, Johann, 2290
  - Behrens, Stephanie, 210, 745, 1810
  - Beische, Denis, 1670
  - Beissner, Katherine, 800
  - Beizer, Judith, 1795
  - Belanger, Holly, 280
  - Bell, Christina, 1945
  - Bell, Simon, 1675
  - Bellelli, Giuseppe, 1025, 1150
  - Bellele, Nardos, 2265
  - Belleville, Sylvie, 2185
  - Bellumori, Maria, 265
  - Belsky, Daniel, 475, 2195
  - Belton, Judy, 2100
  - Belza, Basia, 1070, 1845
  - Ben Assayag, Einor, 272
  - Bender, Duane, 635
  - Bengtson, Vern, 740
  - Benjamin, Emelia, 1665
  - Bennett, Colleen, 460, 1200
  - Bennett, David, 890
  - Bennett, Jill, 220, 525
  - Bennett, Joan, 272, 1015, 1275
  - Bennett, Kate, 40, 1230
  - Bennett, Michael, 75
  - Ben-Shlomo, Yoav, 650
  - Benson, Jacquelyn, 1705
  - Benson, Kari, 1595
  - Benton, Melissa, 270
  - Benuto, Douglas, 1210
  - Benyamini, Yael, 1875
  - Berall, Anna, 1030, 1635
  - Bercovitz, Anita, 1025
  - Berg, Anne, 245, 630
  - Berg, Cynthia, 490, 2240
  - Bergeman, Cindy, 1640, 1770
  - Berger, Shelley, 1060
  - Bergman, Yoav, 860
  - Bergquist, Savannah, 1165
  - Bergstrom, Nancy, 272
  - Berg-Weger, Marla, 320, 665, 1680
  - Berkman, Barbara, 395
  - Berkman, Cathy, 1970
  - Berkman, Lisa, 1010, 1760
  - Berkowsky, Ronald, 720
  - Berlowitz, Dan, 2045
  - Berman, Amy, 415
  - Berman, Rebecca, 1455
  - Bermeo, Sandra, 585
  - Bernad-Elazari, Hagar, 540, 1290
  - Bernard, Marie, 710, 1545, 1985
  - Berndt, Hanna, 360
  - Bernhardt, Jay, 1620
  - Bernstein, Steven, 100
  - Berridge, Clara, 1680
  - Berry, Judy, 600
  - Berry, Mark, 385
  - Bershadsky, Julie, 1595
  - Bertapelle, Jessica, 740
  - Bertram, Lars, 1375
  - Bertrand, Rosanna, 2295
  - Berwick, Sandi, 1005
  - Berzin, Stephanie, 305
  - Besdine, Richard, 1695
  - Best, Latrice, 2265
  - Betz, Joshua, 775, 1785
  - Betz, Marian, 975, 1525
  - Beurskens, Anna, 145
  - Beverly, Claudia, 2075
  - Beyer, Ingo, 2195
  - Beyer, Nina, 272
  - Behradwaj, Manish, 2195
  - Bhatta, Tirth, 600, 645, 1005, 1725
  - Bi, Xiaoyu, 1640
  - Bibbo, Jessica, 240
  - Bielas, Jason, 1615
  - Biggs, Simon, 1225
  - Bildtgård, Torbjörn, 55, 250, 620
  - Bindman, Andrew, 2290
  - Bing, Chong, 655
  - Binkley, Neil, 1670
  - Binley, Zachary, 1140
  - Binns, Ashley, 1425, 1660
  - Binns, Malcolm, 1045
  - Birditt, Kira, 115, 605, 700, 1240, 1650
  - Birge, Stanley, 1690
  - Birney, Sarah, 1730
  - Bisconti, Toni, 250, 600
  - Bisdee, Dinah, 200
  - Bishop, Alex, 245, 825, 995, 2200
  - Bishop, Christine, 1165, 1820
  - Bitzer, Markus, 272
  - Bjerregaard, Frederike, 1050
  - Bjoerk, Linn, 545
  - Bjorkman, Mikko, 1675
  - Black, Betty, 625, 1265, 2035
  - Black, Helen, 1095
  - Black, Kathy, 280, 1590, 1690
  - Black, Sandra, 515
  - Blackburn, Justin, 1535
  - Blackman Thompson, Laurie, 605
  - Blackwell, Terri, 2060
  - Blackwood, Jennifer, 635
  - Blair, Steven, 1135
  - Blake, Valerie, 615, 620
  - Blanc, Stephane, 1570
  - Blancato, Robert, 180, 1160
  - Blandin, Don, 1640
  - Blanke, Elisabeth, 1100
  - Blaskewicz Boron, Julie, 1555, 1630
  - Blaum, Caroline, 1805, 2280
  - Blaxton, Jessica, 1640
  - Bleijlevens, Michel, 145, 1280
  - Blieszner, Rosemary, 210, 1115, 1260, 1390
  - Blivise, Donald, 715, 1805
  - Block, Dorian, 280
  - Blohm, Marcus, 640
  - Blom, Marco, 485
  - Blumenthal, Jacob, 370
  - Boamah, Daniel, 1020
  - Boaz, Lesley, 745

- Boaz, Timothy, 610  
 Bodnar-Deren, Susan, 740  
 Bodner, Ehud, 860  
 Boehle, Sarah, 190  
 Boehm, Julia, 2255  
 • Boerner, Kathrin, 315, 610, 975, 1140, 1500, 1970, 2015  
 Boersma, Derek, 585  
 Boessen, April, 635  
 Boggis, Tiffany, 660  
 Bogner, Hillary, 1020  
 • Boise, Linda, 1325, 1415  
 Boker, Steven, 840  
 Bokhour, Barbara, 1835  
 Boling, Peter, 895  
 Bolkan, Cory, 660, 1635  
 Bollin, Salli, 1690  
 • Boltz, Marie, 145, 530, 1245  
 Bomberger, Stephanie, 2230  
 Bonaccorsi, Guglielmo, 1030  
 Bonds, Denise, 1135  
 Bonet, Milliza, 600  
 Bonfim, Douglas, 980  
 Bonifas, Robin, 455  
 • Bonner, Alice, 1285  
 Boockvar, Kenneth, 1140  
 Boogaard, Jannie, 1755  
 Booker, James, 225, 1005  
 Boot, Walter, 1335  
 Booth, Sarah, 1565  
 Bopp, Melinda, 1040  
 Boratgis, Gabriel, 1890  
 Borck, Rosemary, 2115  
 Borell, Lena, 420  
 Bornstein, Natan, 272  
 Bós, Angelo, 245, 910, 1015, 1665  
 Bos, Pien, 2235  
 Boscart, Veronique, 1675  
 Bosma, Hans, 535  
 Bosmans, Judith, 485  
 Boss, Lisa, 272  
 Bostean, Georgiana, 1865  
 Boston, Krista, 1465  
 Botosaneanu, Anda, 272, 1050  
 Bottone, Frank, 1015  
 Boudreau, Robert, 170, 355, 1145, 2060  
 Boudreaux, Emily, 625  
 Boulton, Elisabeth, 1575  
 Bourjolly, Joretha, 590  
 Bours, Gerrie, 145  
 Bouwman, Tamara, 655  
 Bouxsein, Mary, 1550  
 Bouzan, Colleen, 2115  
 Bowblis, John, 960  
 Bowden, Donald, 1640  
 Bowen, Catherine, 625  
 Bowen, Mary, 1670  
 Bower, Emily, 500, 630  
 Bowers, Barbara, 940, 970, 1025, 1185, 1950  
 Bowland, Sharon, 1170  
 Bowles, Kathryn, 240, 455, 1655  
 Bowman, Molly, 50, 1360  
 Boyd, Cynthia, 1410  
 Boyken, Lara, 875  
 Boyle, Eleanor, 355  
 Boyle, Lisa, 610  
 Boyle, Patricia, 890  
 Brach, Michael, 1580  
 • Bradley, Dana, 665, 1590  
 • Bradley, Elizabeth, 895  
 Bradley, Evie, 935  
 Bradley, Laurence, 1660  
 Bradley, Valerie, 1595  
 Bradshaw, Lydia, 605  
 Bradway, Christine, 1030  
 Brandão, Daniela, 260, 1665, 2015  
 Brande, Sharon, 1690, 2125  
 Branden, Laura, 2100  
 Brandmaier, Andreas, 840  
 Brandt, Nicole, 1295  
 Branson, Cory, 272  
 Brant, Mary, 225  
 Brasher, Melanie, 1110  
 Brassea, John, 1645  
 Bratton-Mullins, Lindsay, 1805  
 Braun, Christine, 1315  
 Braun, Susy, 145  
 Bravo, Marina, 1755  
 Bray, Jennifer, 1420  
 Bray, Jeremy, 2175  
 Brayne, Carol, 1235, 1605, 1645  
 Brazda, Michael, 460  
 Brecht, Meiken, 1675  
 Brenes, Gretchen, 1640  
 Brennan, David, 1745  
 Brennan-Ing, Mark, 315, 835, 1050, 1180  
 Brenneman, Shannon, 325  
 Brett, Belle, 1635  
 Brewer, Melanie, 2280  
 Brewer, Rachel, 100  
 Briggs, J., 1625  
 Brisse, George, 655  
 Brito, Caridad, 1645  
 Brito, Tabatta, 260  
 Brock, Bert, 1280  
 Brodaty, Henry, 1290  
 • Broese van Groenou, Marjolein, 665, 1355, 1690, 1860  
 Bronas, Ulf, 260  
 Brooke, Elizabeth, 750  
 Brooker, Dawn, 1420  
 Brooks Cope, Scott, 140  
 Brosch, Sarah, 455  
 Brosens, Dorien, 855, 1045, 1680  
 Brossoie, Nancy, 375, 425, 1390, 1685  
 Brothers, Allyson, 465  
 Brotherton, Carol, 260  
 Brott Powers, Becky, 365, 1785  
 Broussard, Crystal, 215  
 Brouwer, Ingeborg, 1565, 1665  
 Browdie, Richard, 575  
 Brown, Alisha, 260  
 • Brown, Cynthia, 245, 340, 385, 1295  
 • Brown, Diane, 1675  
 Brown, Dustin, 2170  
 Brown, Edna, 700  
 Brown, J., 2040  
 Brown, Lara, 875  
 Brown, Julie, 350  
 Brown, Lauren, 25  
 • Brown, Lisa, 495  
 Brown, Maria, 835, 1385  
 Brown, Monique, 745, 995  
 Brown, Pamela, 260  
 Brown, Patrick, 940  
 Brown, Rebecca, 2110  
 Brown, Roger, 970  
 Brown, Stephanie, 2245  
 Brown, Wendy, 535  
 Brown-Hughes, Travonia, 625  
 Browning, Colette, 1870  
 • Bruce, Ellen, 655  
 Bruce, Halina, 230  
 Bruce, Martha, 1020  
 Brucks, Elise, 970  
 Bruehl, Steve, 1045  
 Bruin, Marilyn, 2165  
 Bruneau, Jean-François, 875  
 Bruine de Bruin, Wandi, 1625  
 Brunt, Christopher, 960  
 Bruunsgaard, Helle, 2195  
 Bruylands, Michelle, 645  
 Bryant, Ami, 215, 980  
 Brychta, Robert, 535, 1925  
 Bryson, Heather, 1625  
 Buatti, Louisa, 2295  
 Buchanan, Laura, 270  
 Buchmann, Nikolaus, 1375, 2285  
 Buck, Harleah, 1970  
 Bücken, Bettina, 1580  
 Buckholtz, Neil, 1985  
 Budge, Claire, 1495  
 Buehring, Bjoern, 1670  
 Buffel, Tine, 235, 730, 1045, 1220  
 • Buffenstein, Rochelle, 100  
 Bukach, Ashley, 945, 1395  
 Bull, Margaret, 745  
 Bulla, Jan, 1290  
 Buman, Matthew, 615  
 Bunn, Melanie, 905  
 • Burant, Christopher, 1025  
 Burgard, Sarah, 2170  
 Burger, Camille, 970  
 Burgio, Kathryn, 1040, 1945  
 Burhans, Stacey, 975  
 Burholt, Vanessa, 1230  
 Burke, Bridget, 1035  
 Burke, James, 70  
 Burks, Tyasha, 100  
 Burleson, Winslow, 280  
 Burnett, Jason, 225, 1005  
 Burnette, Catherine, 590, 1630  
 • Burnette, Denise, 1190  
 Burns, Jeffrey, 1360, 2300  
 Burns, Richard, 340  
 • Burr, Jeffrey, 980, 1645  
 Burr, Kasey, 280  
 Burruss, Karen, 305, 1050, 1555  
 • Burton, Linda, 335, 1340  
 Busby-Whitehead, Jan, 1035, 2230  
 Buscher, Ines, 450  
 Bush, Amy, 1370  
 Bushman, Tracey, 280  
 Buss, Elizabeth, 140  
 Buta, Brian, 845, 1930  
 Butcher, Colleen, 530  
 Butler, Jorie, 1995  
 Butler, Rachel, 1650  
 • Butler, Sandra, 190  
 Butner, Laura, 210  
 Buttke, Darci, 1465  
 Buttorff, Christine, 1110  
 Buurman, Bianca, 770  
 Buys, David, 880  
 Byers, Amy, 845, 1540  
 Byles, Julie, 925, 980  
 Byrd, Eve, 1270  
 Byrne, Gerard, 1020  
 Byrne, Thomas, 2110

## C

- Caalamán, Erwin, 250  
 Cabin, William, 1900  
 Cabral, Maria, 910, 1015  
 Cabral, Patrícia, 265, 1020, 1660  
 Cacchione, Pamela, 235, 555, 590, 1030, 1895  
 Caceres, Maria, 1125  
 Cadar, Dorina, 120, 1635, 1915  
 Cadet, Tamara, 660, 1055, 1845  
 • Cadogan, Mary, 960  
 Caffrey, Christine, 60, 1435, 2115  
 Cagle, John, 595, 1645  
 Cagney, Kathleen, 725  
 Cahana-Amitay, Dalia, 615  
 Cahill, Kristin, 630  
 Cai, Jin, 1660  
 Cai, Shubing, 790  
 Caillouet, Claire, 265  
 Caillouet, Karla, 265  
 Calamia, Matthew, 120  
 • Calasanti, Toni, 1625, 1645, 1830  
 • Calkins, Margaret, 1685  
 Call, Vaughn, 595, 965  
 Callahan, Christopher, 915  
 Callahan, Jean, 415  
 Callan, Aoife, 470, 1735  
 Calleo, Jessica, 1370  
 Callow, Lauren, 245  
 Calomeni, Mauricio, 1020  
 • Camp, Cameron, 210, 950, 1915  
 Campbell, Allison, 610  
 Campbell, Grace, 1620  
 Campbell, Jennifer, 955  
 Campbell, Vincent, 2310  
 Campos, Jennifer, 1785  
 Canário, Ana, 1660  
 Canedo Garrido, Ana, 1645  
 Canham, Daryl, 205  
 Canham, Sarah, 480, 1260, 1555  
 Cannon, Melissa, 280  
 Cansoy, Mehmet, 665  
 Cantu, Phillip, 1865  
 Canudas-Romo, Vladimir, 1110  
 Cao, Zhen-Bo, 265  
 • Capezuti, Elizabeth, 545, 1280  
 Capistrant, Benjamin, 70, 405, 745, 925  
 Caplan, Lee, 340

- Capp, Rose, 1915  
 Caprio, Thomas, 365, 1945, 2120  
 Capuano, Ana, 1390  
 Caracci, Lesley, 1030  
 Cardenas, Veronica, 1125  
 • Carder, Paula, 990, 1200  
 Carey, Kathleen, 655  
 Carleton, Heather, 1155  
 • Carlson, Barbara, 1805  
 Carlson, John, 1575, 1805  
 • Carlson, Michelle, 170, 515, 775, 1930  
 Carmasin, Jeremy, 625  
 Carney, Brenda, 1840  
 Carney, Kelly, 140, 1690  
 Carnide, Filomena, 965, 1575  
 • Carpenter, Brian, 1520  
 Carr, David, 1525, 1680  
 Carr, Dawn, 665, 750, 1000, 1010, 1395  
 • Carr, Deborah, 15, 1140  
 Carr, Gloria, 590  
 Carrión-Baralt, José, 665, 1710  
 • Carstensen, Laura, 1010, 1100, 1395, 1485, 1715, 2025  
 • Carter, Christy, 1615, 1635, 1905  
 Carter, James, 1755  
 Carter, Mary, 1835  
 Cartwright, Francine, 995  
 Caruso, Lisa, 1635  
 Carvajal, Scott, 570  
 Carvalho, Antonio, 1035  
 Casanova, Ramon, 965  
 Caserotti, Paolo, 355, 535, 1670, 1925  
 • Caserta, Michael, 600  
 Casey, Dympna, 2215  
 Casey, Roger, 1540  
 Caskie, Grace, 510, 590, 625  
 Caspar, Sienna, 2125  
 Caspi, Avshalom, 965  
 Cass, Richard, 270  
 Cassie, Kimberly, 1400  
 Castellon, Steven, 2265  
 Casten, Robin, 315  
 • Castle, Nicholas, 545, 1610, 1680, 1800, 1890, 2125  
 Castro, Al, 600  
 Castro, Paula, 1530  
 Cattan, Mima, 1605  
 Caudry, Daryl, 940  
 Cauley, Jane, 355, 1020, 1665, 1790, 2060  
 Cavallini, Maria, 1030  
 Cavanagh, Andrew, 990  
 Cawthon, Peggy, 1790  
 Celeste, Roger, 995  
 Ceresini, Jacqueline, 995  
 Cerqueira, Margarida, 1645  
 Cerri, Anna, 1150  
 Cha, Grace, 1620  
 Chabot, Éric, 875  
 Chabrashvili, Tinatin, 272  
 Chacon, Rachel, 415  
 • Chadiha, Letha, 1190  
 Chae, Joosuk, 605, 615, 665, 1050, 1645  
 Chafin, Kimberly, 965  
 Chahal, Jasleen, 240, 610, 2040  
 Chai, Hye, 1010  
 Chambers, David, 695  
 Chan, Angélique, 405, 755, 1870  
 Chan, Cecilia, 1250  
 Chan, Darius, 1715  
 Chan, Keith, 1050, 1955  
 Chan, Michael, 230  
 Chan, Piu, 1695  
 Chan, Wallace, 1250  
 Chandola, Tarani, 1470  
 Chaney, Kevin, 410  
 Chang, Bang-Lee, 1680  
 Chang, Charlene, 1330  
 Chang, E-Shien, 245, 755, 830, 985, 1390, 1625, 1640, 1855  
 Chang, Emiley, 650  
 Chang, Feng-Hang, 2070  
 Chang, Megan, 205  
 Chang, Pei-Fen, 265  
 Chang, Sujie, 240  
 Chang, Wanling, 1530  
 Chang, Wen-Chiung, 615, 1045  
 Chang, Yu-Ping, 625, 1045  
 Chao, Shiao-Fang, 280, 980  
 Chao, Ying-Yu, 265  
 • Chapin, Rosemary, 1330  
 Chapman, Ben, 2260  
 • Chappell, Neena, 960, 1915  
 Chard, Sarah, 1080  
 • Charles, Susan, 675, 1640, 1715, 1770, 2255  
 • Charness, Neil, 1335  
 Charnigo, Richard, 1615  
 Chase, Jo-Ana, 1575, 1660  
 • Chasteen, Alison, 1875  
 Chatterji, Somnath, 605, 985, 1015  
 Chaudhry, Sarwat, 385  
 Chaudhury, Habib, 580, 730, 1420, 1685, 1750, 2300  
 Chaumba, Josphine, 2265  
 Chaves, Paulo, 590  
 Chebahtah, Kylie, 235  
 Chen, Baibing, 2030  
 Chen, Brian, 165  
 Chen, Elizabeth, 1295  
 Chen, Emily, 980, 1890  
 Chen, Feinian, 195  
 Chen, Gong, 615  
 Chen, Han, 1670  
 Chen, Huajuan, 660, 1050, 2105  
 Chen, Jia-Yun, 1250  
 Chen, Kong, 585, 1925  
 Chen, Li-Hui, 1950  
 Chen, Peijun, 210, 1945  
 Chen, Randi, 150, 965  
 Chen, Ruijia, 245, 755, 830, 985, 1390, 1625, 1640, 1855  
 Chen, Sanmei, 270  
 Chen, Shuai, 1655  
 Chen, Stephanie, 995, 1400  
 Chen, Taichang, 740  
 Chen, Tao, 270, 1660  
 Chen, Wen, 515, 2085  
 Chen, Xiangmei, 272, 650, 1035, 1695  
 Chen, Yanyan, 195  
 Chen, Yiwei, 620  
 Chen, Yu-Chih, 615, 660  
 Chen-Edinboro, Lenis, 230, 480  
 Cheng, Bei, 965  
 Cheng, Huai, 650, 1045, 1675  
 • Cheng, Sheung-Tak, 1395  
 Cheng, Wen-Yun, 600  
 Cheng, Yen-Pi, 35, 1240  
 Chenoweth, Lynnette, 1430  
 Cheon, Jooyoung, 1650  
 Cherry, Debra, 960, 1710  
 Cherry, Katie, 625  
 Chessen, Carmella, 635  
 Chewing, Betty, 1950  
 • Chi, Iris, 195, 755, 1720, 1900  
 Chiari, Lorenzo, 1665  
 Chiatti, Carlos, 1605  
 Chick, Wallace, 1850  
 Chido, Lisa, 260  
 Childers, Rachel, 625  
 Chiles, Nancy, 1425  
 Chin, Ai, 2145  
 Chin, Ho, 1665  
 Chippendale, Ryan, 1635  
 Chippendale, Tracy, 145, 530  
 • Chiriboga, David, 215, 2265  
 Chiu, Chi-Tsun, 1865, 1870  
 Chmelo, Elizabeth, 1015  
 Cho, Belong, 585, 1670  
 Cho, Hyewon, 1665  
 Cho, JiHyun, 1010  
 Cho, Jinmyoung, 150, 220, 290, 990, 1655  
 Cho, Kelly, 260  
 Cho, Kyung-Hyun, 585, 1615  
 Cho, Kyuyoung, 995  
 Cho, Sung-Hye, 1665  
 Cho, Sung-il, 585, 1670  
 Cho, Sunhee, 980  
 Cho, Yeon, 265  
 Cho, Youngmin, 985  
 Chodosh, Joshua, 960  
 Choi, Ah-Young, 245, 970  
 Choi, Anne, 160, 1330  
 Choi, Eun, 585  
 Choi, Ga-Young, 1395  
 Choi, Heejeong, 1260, 1760  
 Choi, Im, 600  
 Choi, Kyoung, 625  
 Choi, Kyungsuk, 900  
 Choi, Moon, 1680  
 Choi, MoonKi, 1665  
 • Choi, Namkee, 280  
 Choi, Seung, 110  
 Choi, Sung-Jae, 1740  
 Choi, Sunha, 275  
 Chonchol, Michel, 1615  
 Chong, Wayne, 405  
 Chopra, Anita, 1030  
 Chotiner, Marie, 230  
 Chou, William, 260, 645, 650  
 Choudhry, Hammad, 1675  
 Choun, Soyoung, 1095, 2260  
 Chow, Amy, 1250  
 Christen, Yves, 380  
 Christensen, Kaare, 360, 475, 1065, 1145, 2220  
 Christian, Thomas, 95, 1185  
 Christiansen, Lene, 475  
 Christine, Paul, 2170  
 Chu, Charlene, 1675  
 Chu, Chiao-lee, 1630  
 Chu, Leung, 1395  
 Chu, Philip, 2290  
 Chu, Qiao, 990, 1625  
 Chui, Helena, 295  
 Chun, Jessica, 1055  
 Chun, Sang, 1050  
 Chung, Deborah, 1680  
 Chung, Eunkyung, 210  
 Chung, Jane, 1620  
 Church, Timothy, 1135  
 Cianciolo, Patricia, 235  
 Cichy, Kelly, 2055, 2140  
 Cigolle, Christine, 270, 1805, 1910, 1995  
 Cihlar, Volker, 1620  
 Cimarolli, Verena, 315, 2015  
 Cipolletti, Stefano, 1670  
 Ciro, Carrie, 915, 1800  
 Clapsadl, Melannie, 1170, 2110  
 Clark, Cherie, 660  
 Clark, Christi, 155  
 Clark, Dan, 265  
 Clark, Melissa, 1820  
 • Clark, Phillip, 1965  
 Clarke, Cristine, 2230  
 • Clarke, Philippa, 235, 725, 875, 2170, 2225  
 Clay, Olivio, 220, 1710  
 Clayton, Richard, 375, 1555  
 Cleary, James, 2120  
 Clemson, Lindy, 410  
 Clenger, Carolyn, 1635  
 Clifford, Deanna, 1595  
 Closs, Vera, 1015  
 Clouston, Sean, 120, 1480, 1725  
 Cloyes, Kristin, 600  
 Clute, Mary, 1365  
 Coa, Kisha, 235  
 Coats, Abby, 1630  
 Cobb, Ryon, 740  
 Cobb, Sharon, 650, 1015  
 Coca-Perrailon, Marcelo, 1820  
 • Cochrane, Barbara, 525, 1045, 1175, 1405  
 Code, Scott, 635  
 Cogger, Victoria, 585, 1615  
 Cohen, Alan, 2185  
 Cohen, Andrew, 1045  
 Cohen, Elisha, 1845  
 • Cohen, Harvey, 1695  
 Cohen, Lauren, 940  
 Cohen, Pinchas, 475  
 Cohen, Ron, 1135  
 Cohen, Sheldon, 1630  
 Cohen, Steven, 745, 995  
 Cohen-Fridel, Sara, 860  
 • Cohen-Mansfield, Jiska, 210  
 Cohrdes, Caroline, 1100  
 Colaiaco, Ben, 960  
 Colberg, Sheri, 355  
 Cole, Daniel, 272  
 Cole, Marilyn, 1645  
 • Cole, Thomas, 690, 1815

- Coleman, Carissa, 970  
 Coleman, Jamilyn, 925  
 Coleman, Marilyn, 1705  
 Coles, Malcolm, 780  
 Colina, Sonia, 570  
 Colla, Carrie, 1165  
 Collerton, Joanna, 135  
 Collini, Francesca, 1030  
 Collins, Diane, 1665  
 Collins, Heather, 630  
 Collishaw, William, 1025  
 Colman, Ricki, 585  
 Colobong, Romeo, 1045  
 Colpo, Marco, 1665  
 Comijs, Hannie, 1860, 2155  
 Compton-Conley, Cynthia, 570  
 Con, Gulcin, 330  
 Concannon, Thomas, 2090  
 Concha, Jeannie, 335  
 Conde, Alicia, 370  
 Condeelis, Kristen, 990  
 Cong, Zhen, 740, 2050  
 Conley, Kevin, 670  
 Conlon, Annemarie, 655, 895, 1270  
 Conn, Vicki, 1575, 1660  
 Connella, Alyssa, 625  
 Connor, Karen, 960  
 Conrad, Kendon, 480, 1300  
 • Conwell, Yeates, 610, 1215, 1540  
 • Coogle, Constance, 375, 895, 1635, 1905  
 Cook, Diane, 1415  
 • Cook, Fay, 1600  
 Cook, Nicole, 210  
 Cook, Suzanne, 855, 1470  
 Cooke, Heather, 210, 960  
 Coolidge, Frederick, 625  
 Coolman, Tyler, 975  
 • Coon, David, 220, 1115, 1210  
 • Cooney, Teresa, 1680  
 Cooper, Ben, 615  
 Cooper, Emily, 1820  
 Cooper, R., 1050  
 Coots, Laurie, 1435, 2310  
 Cope, Dennis, 960  
 • Corazzini, Kirsten, 905  
 Corcoran, Alison, 1030  
 Corcoran, Chris, 1810  
 Coresh, Josef, 1035  
 • Corley, Connie, 665  
 Cormie, Prue, 1425  
 Cornelison, Laci, 275  
 Corona-Figueroa, Beatriz, 990, 1625  
 Correa, Clynton, 265  
 Cortes, Tara, 175, 1965, 2075, 2280, 2305  
 Corwin, Anna, 1830  
 Cosco, Theodore, 1645  
 Cossman, Jeralynn, 880  
 Costa, Débora, 1660  
 Costa-Couto, Maria-Helena, 1180  
 Costales, Kelsey, 240  
 Costanian, Christy, 665  
 Costanzo, Luisa, 1430  
 Costle, Elizabeth, 785  
 Costley, Alex, 990  
 Cote, Sarah, 1580, 1675  
 Cotrofe, Roberta, 980  
 Cotten, Shelia, 720, 1885, 2160  
 Cotter, J, 610  
 Cotter, J., 225  
 Cotton, Kelly, 272  
 • Coughlin, Joseph, 2005  
 Coursaris, Constantinos, 1885  
 Courtney, Karen, 1580, 2270  
 Courtney-Long, Elizabeth, 2310  
 Couser, Elizabeth, 100, 1950  
 Couture, Melanie, 2290  
 Covinsky, Ken, 770, 1540, 2000  
 Cowan, Ronald, 1045  
 Cowles, Anne, 1665  
 • Cox, Carole, 1030  
 Coyle, Caitlin, 655, 1365  
 Coyle, Peter, 520  
 Crainiceanu, Ciprian, 1780, 1925  
 Cramp, Anita, 1685  
 Crandall, Jill, 475  
 Craver, Andrew, 635  
 Cready, Cynthia, 665  
 Crecelius, Charles, 1690  
 Creekmur, Beth, 1580, 1675, 1995  
 • Crimmins, Eileen, 1065, 1235, 1985  
 Crisp, Suzanne, 2115  
 Crist, Janice, 1125, 1455  
 Crittenden, Jennifer, 1665, 1680  
 Crook, Lauren, 375  
 Crosland, Ann, 980  
 Cross, Robin, 50  
 Crowther, Martha, 215, 990  
 Cruickshanks, Karen, 1675  
 Cruz-Almeida, Yenisel, 965  
 • Crystal, Stephen, 705  
 Csikai, Ellen, 215  
 Csiszar, Anna, 585, 965, 1615  
 Cuervo, Ana, 285  
 Cuijpers, Pim, 485  
 Culberson, John, 480  
 Culler, Krystal, 1365  
 Cumming, Robert, 270  
 Cummings, Jeremy, 245  
 Cummings, Lynn, 1025  
 Cummings, Patricia, 1050  
 • Cummings, Sherry, 1050  
 Cummings, Steven, 965  
 Cummins, Phyllis, 190, 1465  
 Curfs, Emile, 1690  
 Curl, Angela, 975, 1050, 1385, 1525  
 Curtin, Karen, 490  
 Curtis, Lesley, 170  
 Curto, Teresa, 1550  
 Curyto, Kim, 2150  
 Cutchin, Malcolm, 1880  
 Cypser, James, 1850  
 • Czaja, Sara, 50, 485, 1335, 1755, 2160
- D**
- Daatland, Svein, 625  
 Dabelko-Schoeny, Holly, 1755  
 Dagaincourt, Nicholas, 1550  
 D'Agostino, Ralph, 1665  
 Dai, Mingliang, 665, 1050  
 Dai, Yuka, 970  
 Dailey, Heather, 215  
 Dakheel-Ali, Maha, 210  
 Dakin, Emily, 1685  
 Dal Bello-Haas, Vanina, 210  
 Dale, William, 1980  
 Dalgård, Christine, 475  
 Daly, Tom, 200  
 Dam, Thuy-Tien, 355  
 Damarin, Amanda, 620  
 D'Ambrosio, Joseph, 250, 495, 1535, 1640  
 D'Ambrosio, Lisa, 2005  
 Damian, Ecaterina, 1820  
 Damman, Marleen, 885  
 • Damron-Rodriguez, JoAnn, 5, 960  
 Danely, Jason, 405  
 Dangerfield, Sheyenne, 1625  
 Daniel, Candice, 225, 595  
 Daniels, Lori, 1350  
 • Danigelis, Nick, 1645  
 • Dannefer, Dale, 200, 705, 1340  
 Danylyshen-Laycock, Tracy, 210  
 Darling, Chad, 210  
 da Rosa, Grace, 825  
 Da Silva, Jaqueline, 980  
 da Silva, Keyte, 640  
 Dassel, Kara, 230  
 D'Astous, Valerie, 310  
 Dautovich, Natalie, 1630  
 Dautzenberg, Maaïke, 1690  
 Davatzikos, Christos, 965  
 • Davey, Adam, 225, 630, 1625  
 Davidoff, Ann, 1680  
 Davie, Laura, 2190  
 Davies, Barbara, 1675  
 Davies, Dan, 1620  
 Davies, Karen, 135, 272, 910  
 Davis, Agnes, 1640  
 Davis, Beth, 1635  
 Davis, Caroline, 665  
 Davis, Eden, 970  
 Davis, James, 1945  
 Davis, Jullet, 275  
 Davis, Lori, 1040  
 Davis, Tracy, 1745  
 • Davitt, Joan, 215, 565, 590, 955, 1300, 1450, 1590  
 D'Avolio, Deborah, 1030  
 Dawes, Martin, 265  
 Dawson, Nicole, 2080  
 Day, Lesley, 660  
 Day, Lisa, 905, 905  
 Day, Mary, 1640  
 Deak, Ferenc, 965, 1615  
 Deal, Jennifer, 775  
 Deb, Partha, 1845  
 Debnam, Katrina, 60  
 de Boer, Bram, 1420  
 De Bruin, Simone, 1420
- De Cabo, Rafael, 585, 1615, 1850  
 DeCaro, Jason, 105  
 DeCoster, Jamie, 1040  
 Decker, Leslie, 1290  
 De Donder, Liesbeth, 235, 650, 990, 1045, 1205, 1680  
 • Deeg, Dorly, 120, 665, 1355, 1725, 1860, 2155  
 Deering, Jacob, 365, 1995  
 Deevy, Martha, 1395  
 De Feo, Melissa, 620  
 de Frias, Cindy, 30, 1640  
 De Geest, Sabina, 545  
 Degryse, Jan, 965, 1670  
 Deichert, Jerome, 1010, 1690  
 • Deimling, Gary, 1510, 1630  
 de Jonge, M., 2035  
 DeKoekkoek, Tracy, 20, 1885  
 Delaney, Rebecca, 1625  
 De Lange, Frits, 1310  
 de Lange, Jacomine, 530  
 DeLaTorre, Alan, 660, 1450, 1590  
 De Leo, Diego, 1900  
 DeLiema, Marguerite, 1055  
 Dellamora, Michelle, 1685  
 Deller, Juergen, 1010  
 de los Campos, Gustavo, 1480  
 Delzell, Elizabeth, 1535  
 Demark-Wahnefried, Wendy, 1630  
 DeMarshall, Cassandra, 965  
 de Medeiros, Kate, 125, 440, 950, 1050, 1815, 2315  
 Demers, Louise, 240  
 • Demiris, George, 155, 345, 505, 1515, 1620  
 Demissie, Serkalem, 2285  
 Demontiero, Oddom, 585  
 Demuth, Ilja, 675, 1375, 2285  
 Denfeld, Quin, 525  
 Den Hartog, Kevin, 260  
 Denkinger, Michael, 320  
 Dennis, Mary, 2055  
 DeNomie, Melissa, 600  
 Denson, Kathryn, 1675  
 Denson, Steve, 1675  
 Dentino, Andrew, 2075  
 Deokar, Angela, 1625  
 DePasquale, Nicole, 2175  
 Der Ananian, Cheryl, 590  
 Derhovanessian, Evelyn, 1375  
 Derkx, Peter, 1310  
 DeRuyter, Frank, 240  
 De Santos Avila, Fabiola, 1635  
 DeShazo, Jonathan, 995  
 Deshpande, Nandini, 320, 1775  
 de Siqueira, Amaury, 1635  
 Dettmer-Fluegge, Andrea, 272  
 Deutsch, Anne, 1185  
 DeVan, Allison, 1615  
 • DeViney, Stanley, 1010

- DeVito Dabbs, Annette, 1580, 2270
- De Vries, Brian, 1180
  - Dewar, Alexis, 1635
  - de Witte, Luc, 635, 2035
  - De Witte, Nico, 235, 650, 990, 1045, 1205
  - de Zapien, Jill, 570
  - Dhamoon, Mandip, 70
  - Di, Zhen, 410
  - Diamond, Pamela, 225, 1005
  - DiazInfante-Villalpando, Alejandra, 990
  - Diaz-Logroño, Luis, 1710
  - Diaz Moore, Keith, 130, 2300
  - Di Bari, Mauro, 1030, 1670
  - DiBartolo, Mary, 1665
  - Dickerson, Anne, 975, 1525
  - Dicks, Robert, 920
  - Diehl, Manfred, 295, 465, 2025
  - Diem, Susan, 1665
  - Dierckx, Eva, 650, 1205
  - Dierckx de Casterlé, Bernadette, 1280
  - Dietrich, Mary, 1045
  - Diez Roux, Ana, 2225
  - Di Gessa, Giorgio, 1190
  - Di Giulio, Paola, 980
  - DiGuseppi, Carolyn, 1525
  - Dijkstra, S., 1565
  - Dilkes, Susan, 980
  - Dill, Katherine, 655
  - Dillard, Rebecca, 1635
  - Dillon, Haley, 980
  - Dillon, Maeghan, 1315
  - DiLollo, Anthony, 1620
  - Dilworth-Anderson, Peggy, 220, 2175
  - DiNapoli, Elizabeth, 980
  - Ding, Ding, 1275
  - Ding, Jingzhong, 1990
  - Dingemans, Ellen, 1010
  - Dingley, Catherine, 600
  - DiNitto, Diana, 280
  - Di Serio, Claudia, 1670
  - Diwan, Sadhna, 205
  - Dixon, Jane, 525
  - Dixon, Roger, 245, 625, 965, 995
  - Dobbs, Debra, 280, 900, 1690, 2125
  - Dobish, Heidi, 1630
  - Dobson, Annette, 535, 925
  - Dodd, Virginia, 1620
  - Dodge, Hiroko, 50, 1360, 1415
  - Dodson, John, 385
  - Doerfler, Deborah, 265
  - Doffing, Melissa, 1620
  - Dogbevi, Serg, 925
  - Dohmen, Joep, 1310, 2235
  - Dolbee, Carol, 365
  - Dolbin-MacNab, Megan, 735, 2020, 2055
  - Doll, Gayle, 275
  - Doll, Jessica, 605
  - Domaradzka-Widla, Anna, 1680
  - Dong, Birong, 1695
  - Dong, Liming, 1020
  - Dong, Xinqi, 245, 755, 830, 985, 1390, 1625, 1640, 1855
  - Donkers, Lia, 1690
  - Donlan, Alice, 1690
  - Donlon, Tim, 150, 965
  - Donnelly, John, 385
  - Donorfio, Laura, 1650
  - Dornberg-Lee, Sharon, 1455
  - Dorner-Hoerig, Lara, 795
  - Dosa, David, 1185
  - Dotson, Megan, 630
  - Dougherty, P., 1665
  - Douglas, Joseph, 1995
  - Douglas, Megan, 215
  - Douthit, Kathryn, 1340, 1620
  - Dow, Alan, 1270
  - Dowd, Jennifer, 75
  - Dowers-Nichols, Claire, 2075
  - Dowling-Castronovo, Annemarie, 175
  - Downer, Brian, 1555
  - Downes, Deirdre, 1970
  - Downey, Christine, 1275
  - Downs, Murna, 140, 420, 940
  - Doyle, Daniel, 1635
  - Doyle, Patrick, 460, 610
  - Drafts, Doris, 1275
  - Drainoni, Mari-Lynn, 1835
  - Drawz, Paul, 925
  - Drever, Anita, 505
  - Drew, Julia, 1025
  - Drewelies, Johanna, 1375, 2250
  - Dring, David, 635
  - Driscoll, Monica, 585, 1475
  - Driver, Jane, 260
  - Drolet, Anne, 235
  - Druley, Todd, 1145
  - Drummond, Danielle, 620
  - Drummond, Neil, 1055
  - Du, Yan, 160
  - Dua, Tarun, 485
  - Duarte, Natália, 260, 1665, 2015
  - Duarte, Yeda, 260
  - Dubbart, Patricia, 370, 1040, 1255
  - DuBose, Thomas, 1015
  - Ducharme, Francine, 2290
  - Duddy, Madison, 620
  - Duezel, Sandra, 1375
  - Dufour, Alyssa, 585
  - Dugan, Elizabeth, 60, 245, 260, 275, 605, 615, 620, 970, 975, 980, 1000, 1050, 1095, 1295, 1645
  - DuGoff, Eva, 1110
  - Dugravot, Aline, 1255, 2080
  - Du Moulin, M., 2035
  - Duncan, Sarah, 1020
  - Dunifon, Rachel, 2055
  - Dunkle, Ruth, 225, 235, 395, 1075, 1190, 1840
  - Duntzee, Christina, 110, 2150
  - Dunwoody, Colleen, 1635
  - Dupontgand, Sophie, 265
  - Dupuis, Gilles, 585
  - Duque, Gustavo, 585
  - Durkin, Daniel, 1115
  - Dury, Sarah, 235, 855, 990, 1045, 1680
  - Dutcher, Sarah, 1950
  - Duthie, Edmund, 1675
  - Duvvury, Nata, 470, 1735
  - Duyndam, Joachim, 2235
  - Düzel, Sandra, 1375
  - Dwyer, Lisa, 2115
  - Dyer, Carmel, 225, 1005
  - Dykstra, Pearl, 115, 330
  - Dzierzewski, Joseph, 1910
- ## E
- Eades, Allison, 1635
  - Earhart, Gammon, 1660
  - Easom, Leisa, 225, 345, 2180
  - Easton, Scott, 1630
  - Eaton, Benjamin, 585
  - Eaton, Jacqueline, 665, 1055
  - Eckardt, Rahel, 1375, 2285
  - Eckert, J., 460, 1080
  - Eckhardt, Jessica, 510
  - Eclar, Kathryn, 1030
  - Eddens, Katherine, 970
  - Edelman, Linda, 230
  - Edelstein, Barry, 610, 1540, 1625
  - Edelstein, Beatrice, 1635
  - Edes, Thomas, 1965
  - Edmonds, Natali, 365
  - Edmondson, Ricca, 690, 1310, 2250
  - Edmondson, Veronica, 1660
  - Edvardsson, David, 420, 545
  - Edwards, Christopher, 300, 1640
  - Edwards, Kate, 215
  - Edwards, Michelle, 1230
  - Edwards, Valerie, 1625
  - Efrat, Kliper, 272
  - Egan, Crystelle, 480
  - Egan, Terry, 1635
  - Egerton, Emily, 905
  - Egleston, Brian, 455
  - Ehlmann, Katie, 225, 1730
  - Ehrenreich, Heidi, 540
  - Eibich, Peter, 1375
  - Eichorn, Sharon, 1625
  - Eichorst, Morgan, 215, 220, 245, 995, 1495
  - Eimicke, Joseph, 1890
  - Eiriksdottir, Gudny, 535, 1565, 1665, 1925
  - Eisenstein, Amy, 875
  - Eisner, Jodie, 625
  - Ejaz, Farida, 405, 945, 1400
  - Ekerdt, David, 10, 885
  - Ela, Jillian, 210
  - Elbaz, Alexis, 1255, 2080
  - Elgaddal, Nazik, 995
  - Elias, Brenda, 1470
  - Elias, Jeffrey, 230
  - Elkind, Mitchell, 70
  - Eller, Lucille, 835
  - Ellington, Lee, 665
  - Elliot, Ari, 1340, 1620
  - Elliot, Michael, 1010
  - Elliot, Susan, 510
  - Elliot, Dustin, 630
  - Ellis, Dana, 2005
  - Ellis, Michelle, 665
  - Ellwardt, Lea, 2155
  - Eloyan, Ani, 1925
  - Elsaesser, Valerie, 605
  - Emerick, Eric, 750, 1630
  - Emerson, Kerstin, 510
  - Emery, Erin, 590
  - Emery, Lisa, 1630
  - Emler, Charles, 1745, 2205
  - Emrich, Christopher, 2270
  - Engberg, John, 1610, 1680, 2125
  - Engelman, Michal, 2040
  - Englehardt, Jacqueline, 1635
  - English, Kirk, 1570
  - English, Tammy, 1100, 1485
  - Engstrom, Gabriella, 450, 1155, 1285
  - Enguidanos, Susan, 240, 845
  - Enoka, Roger, 1615
  - Enroth, Linda, 1065
  - Ensberg, Mark, 2125
  - Ensrud, Kristine, 1020, 1540, 1665, 1790, 2060
  - Enticott, Joanne, 1870
  - Eom, Kirsten, 405
  - Epane, Josue, 205, 445, 1105, 2095
  - Epel, Elissa, 1060
  - Epstein, Joel, 745
  - Erickson, Lance, 595, 980
  - Erlen, Judith, 1030, 1295, 1690
  - Ermer, Ashley, 1385
  - Ernesto, Sarah, 265
  - Ernst-Bravell, Marie, 1510
  - Ersek, Mary, 1295, 1810
  - Eshraghi, Karen, 2150
  - Eslinger, Paul, 1810
  - Espeland, Mark, 965, 1135, 1805
  - Espinel-Bermudez, Claudia, 270
  - Espinoza, Sara, 270, 370, 1945
  - Estabrook, Ryne, 120, 2260
  - Estabrooks, Carole, 145, 1155, 2290
  - Estes, Carroll, 1340
  - Estevez-Cores, Sara, 665
  - Estrada-Sanchez, Ana-Maria, 1615
  - Ettrich, Betina, 1015
  - Euype, Scott, 640
  - Evandrou, Maria, 240, 275, 1055
  - Evans, Bronwynne, 1210, 1250
  - Evans, Denis, 235
  - Evans, Elizabeth, 10, 1935
  - Evans, Gina, 1370
  - Evans, Jovier, 695, 1215
  - Evans, Lois, 905, 1280, 1810
  - Evans, Michele, 880
  - Evans, Simon, 1420
  - Evenson, Kelly, 2225
  - Everett, Emilie, 595
  - Evers-Manly, Shirley, 260, 645, 650
  - Ewen, Heidi, 220, 240, 610, 665
  - Ewing, Reid, 280

## F

- Fabbre, Vanessa, 560  
 Fagerberg, Ingegerd, 1155  
 Fahey, Lynn, 325  
 Fahy, Greg, 1850  
 Fain, W., 1415  
 Fairchild, Jennifer, 1370  
 Falconi, April, 965  
 Falkingham, Jane, 240, 275, 1055  
 Fan, Jin, 1695  
 Fan, Vincent, 595  
 Fardo, David, 1555, 1680  
 Farnworth, Louise, 660  
 Faul, Anna, 250, 495, 1020, 1535, 1640  
 Faul, Jessica, 1015  
 Faulkner, Kimberly, 355  
 Faustin, Ashley, 415  
 Fauth, Elizabeth, 745, 1510  
 Fawcett, Emily, 1850  
 Feder, Shelli, 385  
 Federman, Alex, 2000  
 • Feinberg, Lynn, 1315  
 Feld, Sheila, 225  
 Feldman, Lori, 230, 620, 990, 1650  
 Feldman, Moshe, 1270, 1635  
 Feldman, Penny, 1655, 2000  
 Fell, Sharon, 365  
 Femia, Elia, 865  
 Feng, Hua, 985  
 Feng, Michelle, 610  
 Feng, Zhanlian, 1435  
 Feng, Zhixin, 240, 275, 970, 1055, 1535  
 Fenster, Emily, 1010  
 Ferdous, Farhana, 2300  
 Ferguson, Ian, 655  
 Ferland, Guylaine, 2185  
 Fernández, Virginia, 1770  
 • Fernandez-Ballesteros, Rocio, 1645  
 Fernández-Fernández, Virginia, 1755  
 Ferrante, Lauren, 770  
 Ferrari, Michel, 2250  
 • Ferraro, Kenneth, 15  
 Ferreira, Reggie, 495, 1640  
 • Ferrucci, Luigi, 165, 320, 435, 535, 810, 1550, 1780, 1925, 1985  
 Fetherstonhaugh, Deirdre, 1430  
 • Fiatarone Singh, Maria, 1290, 1425  
 • Fick, Donna, 1030  
 Fidler, Ellen, 1670  
 Fielding, Elaine, 1430  
 • Fielding, Roger, 435, 585, 1135  
 Fields, Morgan, 1020  
 Fields, Noelle, 935, 2180  
 Figueroa, Rafael, 260  
 Figueroa, Surgey, 1625  
 Filho, Irênio, 1015  
 Fillingim, Roger, 965, 1045, 1660  
 Finchum, Tanya, 825  
 Findon, James, 310  
 • Fingerman, Karen, 35, 115, 970, 1240, 1650, 2030  
 • Finkel, Deborah, 2220  
 Finlay, Jessica, 1685  
 Finne-Soveri, Ulla, 1675  
 • Fiori, Katherine, 700  
 Fischer, Kathleen, 265  
 Fischer, Maarten, 1420  
 Fischer, Toria, 1615  
 Fish, Joshua, 1765  
 Fisher, Cheryl, 1025  
 Fisher, Gwenith, 1085, 2140  
 Fisher, Jane, 1210  
 Fisher, Keonte', 210  
 Fisher, Matan, 1670  
 Fisher, Nadine, 635  
 Fishman, Nancy, 940  
 Fisk, Arthur, 1620  
 • Fiske, Amy, 1215, 1540  
 Fitzgerald, Kelly, 1590  
 Fitzgerald, Patricia, 1030  
 Fitzgibbon, Marian, 1255  
 Fitzpatrick, Annette, 170  
 Fitzsimmons, Suzanne, 1905  
 Fitzsimons, Deborah, 1685  
 Fix, Robert, 895  
 • Flanagan, Susan, 1465  
 Flatt, Jason, 1360  
 Fleck, Jessica, 965, 995  
 Flesner, Marcia, 1430, 1690  
 Fletcher, Kathleen, 895  
 Flick, Heather, 210  
 Floegel, Theresa, 615  
 Flores, Gerardo, 1015, 1025  
 Flores-Villavicencio, Maria, 990, 1625  
 Florez-Pregonero, Alberto, 615  
 Florian, Peter, 585  
 Florsheim, Margaret, 980  
 Foden, Patricia, 1680  
 Fogg, Louis, 615  
 Fokkema, Tineke, 40  
 Fong, Daniel, 1395  
 Foor, Kayla, 1665  
 Ford, Bryan, 1350  
 Ford, Cassandra, 300  
 Ford, Chanee, 600  
 Ford, Katy, 215  
 Ford, Katy-Lauren, 245, 625  
 Forma, Leena, 845  
 Forman, Daniel, 1130  
 Forman-Hoffman, Valerie, 2310  
 Formica, Gina, 265  
 Fors, Stefan, 360, 1065  
 Fortes, Renata, 1530  
 Fortin, Carl, 585  
 • Fortinsky, Richard, 400, 915, 1020  
 Fortner, Melissa, 225, 610  
 Foster, Harmonie, 640  
 Foster, Stephen, 585  
 Fouladi, Negin, 1580  
 Fouweather, Tony, 1235  
 Fowler, Nicole, 1360  
 Fox, Kathleen, 210  
 Fox, Krista, 1470  
 Fox, Mary, 1675  
 Frahm, Kathryn, 495  
 Franco, Zeno, 600  
 Frank, David, 625, 630  
 • Frank, Janet, 5  
 Franke, Annette, 2005  
 Franke, Thea, 1685  
 Frankowski, Ann, 460  
 Franks, Melissa, 610, 1625  
 Franz, Carol, 55, 1085, 2220  
 Fraser, Sarah, 1050  
 Fratiglioni, Laura, 2275  
 • Fredman, Lisa, 225, 1665, 2245  
 • Fredriksen-Goldsen, Karen, 395, 560, 2205  
 Freed, Sara, 1630  
 Freedlander, Jonathan, 2100  
 Freedman, Barry, 1640  
 Freedman, Vicki, 70, 1445, 2275  
 Freiberger, Ellen, 1715  
 Freire, Aline, 1665  
 Freire, Marcos, 980  
 Frentiu, Cristina, 1915  
 Freund, Alexandra, 840, 1100  
 Freund, Katherine, 1680  
 Freyre, Rachel, 245  
 Freytes, Ivette, 225  
 • Fried, Linda, 1015, 1930  
 Fried, Terri, 1045, 2030  
 Friedemann-Sanchez, Greta, 405  
 Friedman, Daniela, 1070  
 • Friedman, Elliot, 610  
 Friedman, Esther, 2090, 2140  
 Frisoli, Alberto, 1035  
 Fritzell, Johan, 995, 1065  
 Frogner, Bianca, 1400  
 Fruhauf, Christine, 510, 735, 1325, 1765  
 • Fry, Prem, 1095  
 Fu, Rong, 335, 1625  
 Fuentes, Patricio, 1030  
 Fuentes-García, Alejandra, 970  
 Fuhrer, Marcus, 240  
 Fujita, Koji, 1020  
 Fujiwara, Yoshinori, 230, 270, 272, 590, 620, 655, 1665  
 Fukaya, Taro, 590  
 Fulks, Steven, 225  
 Fuller-Thomson, Esme, 590, 655, 735, 2020  
 Fullmer, Elise, 1635  
 • Fulop, Tamas, 585  
 Fung, Constance, 1910  
 • Fung, Helene, 230, 980, 1625, 1640, 1715  
 Funk, Laura, 55  
 Furlotte, Charles, 1745  
 Futterman, Andrew, 620, 990, 1635  
 Fuzzell, Lindsay, 1625

## G

- Gabbard, Susan, 780  
 Gadbois, Emily, 790  
 Gaeta, Raphael, 1590  
 Gage, Barbara, 1165, 1185  
 Gagne, Danielle, 280  
 Gagné, Jean-Pierre, 1620  
 Gagnon, David, 260  
 Gagnon, Sylvain, 975

- Gahbauer, Evelyne, 770  
 Gaines, Brittany, 605, 620, 655, 1050, 1645  
 • Galambos, Colleen, 635, 1415, 1690  
 Galarraga, Omar, 2105  
 Galik, Elizabeth, 145, 240, 1245, 1915  
 Galindo-Garre, Francisca, 1030  
 Galkowski, Lorraine, 1275  
 Gallagher, Nancy, 235  
 • Gallagher-Thompson, Dolores, 485, 1210  
 Galletta, Joanna, 1030  
 Gallo, Joseph, 1020  
 Gallo, William, 885  
 Galvao, Daniel, 1425  
 Galvin, James, 145, 530, 995, 2275  
 Gamaldo, Alyssa, 215, 230, 300  
 Gamaldo, Charlene, 300  
 Gando, Yuko, 265  
 Gannotta, Gail, 2270  
 Gans, Daphna, 960  
 Ganz, David, 960  
 Gao, Jin, 350  
 Gao, Na, 235  
 Gao, Xiang, 220, 600  
 Garcia, Katelyn, 1565  
 Garcia, Marc, 1865  
 Garcia-Peña, Carmen, 270, 665  
 Garcia-Soler, Alvaro, 615  
 Gardiner, Paul, 265, 2145  
 Gardner, Andrew, 1575  
 • Gardner, Daniel, 415  
 Garfinkle-Castro, Andrea, 280  
 Garibaldi, Vielka, 780  
 Garneau, Hugo, 585  
 Garner, Kimberly, 370, 1040, 1255  
 Garon, Suzanne, 1610  
 Garrido, Melissa, 1140  
 Garst Walsh, Diane, 990  
 Garvan, Cynthia, 1045  
 Garver, Kayla, 1575  
 Gase, Lauren, 280, 1050  
 Gaskin, Darrell, 160  
 Gass, Jesse, 230, 620, 990, 1650  
 Gass, Julie, 210  
 Gassoumis, Zachary, 660, 1005, 1610  
 Gast, Julie, 1050  
 Gatchell, Gregory, 1945  
 Gates, Nicola, 1290  
 • Gatz, Margaret, 35, 210, 1920  
 Gaudet Hefele, Jennifer, 1820  
 Gaudreau, Pierrette, 2185  
 Gautam, Asmita, 220  
 Gautam, Ramraj, 1325  
 Gautam, Tripti, 585  
 • Gavrillov, Leonid, 965  
 • Gavrilova, Natalia, 965  
 Gayda-Chelder, Christine, 965, 995  
 Gayzur, Nora, 630  
 Gazit, Eran, 540  
 Geda, Mary, 385

- Geddes, Louise, 1180  
 Geers, Andrew, 665  
 Geiger, Jennifer, 220, 1050  
 Geirsdottir, Olof, 1425  
 Geldhof, G., 970, 2140  
 • Gellis, Zvi, 280, 1845  
 Gelow, Jill, 525  
 Genco, Emma, 1525  
 Gendron, Tracey, 1010, 1635  
 Génereux, Mélissa, 875  
 Genesio, Christopher, 610  
 Genoversa, Susan, 2100  
 Genther, Dane, 1785  
 Gentile, Tristen, 110, 915, 1345  
 Gentry, Justin, 1620  
 • George, Linda, 1110  
 George, Login, 1095  
 George, Nika, 745  
 Georges, Annie, 780  
 Gerhard, Lori, 1960  
 Germain, Cassandra, 650  
 Gerolimatos, Lindsay, 610, 1625  
 Gerrans, Paul, 1485  
 • Gerstorf, Denis, 30, 295, 675, 1375, 1880, 2030, 2240, 2260  
 Ghanian, Sheila, 585  
 Ghertner, Robin, 780  
 Ghisletta, Paolo, 840, 890  
 Ghosh, Subharati, 405  
 Ghoshal, Nupur, 1710  
 Giasson, Hannah, 1880  
 Gibson, Allison, 935, 1055  
 Gibson, Madeline, 410  
 Gibson, Nora, 425  
 Gibson, Sheri, 605  
 Gidmark, Stefanie, 790  
 • Gierveld, Jenny, 40  
 Gifford, Wendy, 1675  
 Giger, Jarod, 1530  
 Giladi, Nir, 540, 1290  
 Gildner, Theresa, 605, 985  
 • Gill, Thomas, 385, 770, 1135  
 Gilleard, Chris, 10, 200, 1090  
 Gillen, Laura, 620  
 Gilligan, Megan, 35, 115, 330, 1650  
 Gilmer, Todd, 2110  
 Gilmore-Bykovskiy, Andrea, 970, 1030, 1185, 1950  
 Ginsler, Mindy, 1470  
 Giordano, Tony, 1615  
 Giovanni, Andrew, 585  
 Girling, Laura, 980, 1080, 1200  
 Girona, Melanie, 1025  
 Gitler, Aaron, 285  
 • Gitlin, Laura, 110, 210, 570, 625, 915, 1345, 1450, 1750, 1800, 2035, 2130, 2175  
 Gitter, Robert, 945  
 Giuliani, Maryanne, 2280  
 Given, Barbara, 1515, 1885, 2160  
 Given, Charles, 20, 345, 1535, 1885, 2160  
 Given, Jeannette, 1675  
 Gizdarska, Simona, 1630  
 Glaser, Karen, 310, 1190  
 • Glass, Anne, 130, 510, 665  
 Glass, Thomas, 335, 1780  
 Gleib, Dana, 45  
 Glenn, Jordan, 1425, 1660, 1665  
 Glick, Jennifer, 1690  
 • Glicksman, Allen, 1300, 1605  
 Glover, Toni, 1660  
 Glowacki, Christa, 410  
 Glueck, Judith, 795, 2250  
 Glueckert, Kate, 1465  
 Glymour, M, 1760  
 Glymour, M., 70  
 Glynn, Nancy, 355, 965, 1135, 1780  
 Gnjidic, Danijela, 1410  
 Göbel, Jan, 1880  
 Gobel, Vicki, 410  
 Godde, Ben, 500  
 Godino, Job, 1930  
 Goel, Anisha, 925  
 Goergen, Andrea, 1765  
 Gogol, Manfred, 272, 1795  
 Goguen, Monique, 1730  
 Goins, R., 600  
 Gokcay, Didem, 890  
 • Golant, Stephen, 1750, 2165  
 Goldberg, Allon, 1665  
 Goldberg, Marcel, 1010  
 • Golden, Robyn, 590  
 Goldman, Noreen, 45  
 Goldscheider, Frances, 45  
 Goldsmith, Jeff, 1780  
 • Goldstein, Mary, 1715, 1945  
 Goldstein, Richard, 1560  
 Goldwaser, Eric, 965  
 Goler, Timothy, 1005  
 Gomes, Cristiano, 1665  
 Gonçalves, Ana, 1660  
 Gonçalves, Synara, 980  
 Gondo, Yasuyuki, 272, 290, 610, 615, 990, 1150, 1360, 1500, 2015  
 Gong, Cathy, 1220, 1605, 1870  
 • Gonyea, Judith, 1600, 2110  
 Gonzales, Ernest, 1680, 2105  
 Gonzalez, Elena, 1415  
 Gonzalez, Eneida-Yvette, 370  
 González, Mari, 615  
 Gonzalez, Richard, 295, 1490  
 Gonzalez Nuñez, Carlos, 1625  
 Gooblar, Jonathan, 1520  
 Goodin, Burel, 1660  
 Goodman, Laura, 2295  
 Goodpaster, Bret, 435  
 Goodwin, Paige, 1630  
 Goodyear, Christine, 2070  
 Gopaul, Karen, 1930  
 Gordan, Elizabeth, 600  
 Gordon, Carol, 1660  
 Gordon, Kate, 1810  
 Gore, Joel, 230  
 Gorges, Rebecca, 1140  
 Gorina, Yelena, 995  
 Goris, Emilie, 2080  
 Gorman, Bridget, 325  
 Gorzelle, Gregg, 1915  
 Gosselin, Louise, 875  
 Gosselink, Carol, 235  
 Gottesman, Rebecca, 230  
 Gottlieb, Benjamin, 630  
 Gotto, George, 1365  
 Gougeon, Laura, 2185  
 Gould, Christine, 1370  
 Goveas, Joseph, 965, 1805  
 Govia, Ishtar, 680, 755  
 Govindarajan, Prasanthi, 1455  
 Gowda, Vidya, 1685  
 Gozalo, Pedro, 1185  
 Grabowska, Magdalena, 1050  
 Grabowski, David, 940, 1165, 1820  
 Graces, Anamarie, 1605  
 Graf, Allyson, 1095  
 Graham, Carrie, 130, 565, 1300, 1450, 1975  
 Graham, James, 1665  
 Graham-Engeland, Jennifer, 2255  
 Granado Gil, Tania, 1635  
 Granic, Antoneta, 135, 272, 910  
 Grant, George, 1140  
 Grant, Marren, 225, 595  
 Gräske, Johannes, 530  
 Grau, Bruce, 1045  
 Gravenstein, Stefan, 1820  
 Gray, Michelle, 1425, 1660, 1665  
 Gray, Stephanie, 1665  
 Graybill, Erin, 1105  
 Gray-Donald, Katherine, 2185  
 Grbcich, William, 1630  
 Green, Ariel, 1815  
 • Green, Carmen, 2085  
 Green, Kerry, 625  
 Green, Philip, 1925  
 • Greenberg, Jan, 205  
 Greenberg, Patricia, 1765  
 Greenberg, Phyllis, 615  
 Greenberg, Sherry, 1895, 1965, 2280  
 Greene, Angela, 1435  
 Greene, April, 615  
 Greene, Celeste, 1000  
 Greene, Edie, 605  
 • Greene, Vernon, 655  
 Greenfield, Emily, 325, 1190, 1450  
 Greenlee, Jessica, 105, 755  
 Greenwood, Carol, 630, 2185  
 Gregg, Jeffrey, 610, 1215  
 Gregor, Mattie, 50  
 Gregorich, Steven, 245  
 Greiner, Chieko, 1025  
 Grenhart, Will, 230  
 Greska, Eric, 265  
 Gretebeck, Kimberlee, 765  
 Griffith, Jennifer, 665, 1995  
 Griffiths, Patricia, 595, 1530, 1755  
 Grigsby, Jim, 1615  
 Grinshteyn, Erin, 235  
 Groessl, Erik, 1135  
 Grogan, Kathleen, 990  
 Gross, Alden, 1020, 1480, 1625, 1930, 2175  
 Gross, James, 1630  
 Grosse, Volker, 665, 1675  
 Grossi, Valentina, 1670  
 Grossman, Molli, 155, 1115, 2270  
 Grossman, Murray, 1810  
 Grouls, Jose, 1280  
 Grove, John, 150, 965  
 Gruenewald, Tara, 45, 155, 615, 850, 970, 1115, 1875, 2140, 2270  
 Grünh, Daniel, 465, 990, 1625  
 Gu, Huanzhong, 630  
 Guarino, Anthony, 1030  
 Guarnaccia, Charles, 215  
 Gudnason, Vilmundur, 585, 1565, 1665  
 Guerra, Ricardo, 1665  
 Guess, Jamey, 2195  
 • Gugliucci, Marilyn, 1665  
 Guihan, Marylou, 790  
 Gulpers, Math, 1280  
 Gunaratnam, Krishanthi, 585  
 Gunawardene, Piumali, 585  
 Gunther, Jilene, 785  
 Guo, Jing, 1980  
 Guo, Man, 755  
 Guo, Max, 1475  
 Guo, Qihao, 1275  
 Guo, Tangmeng, 965  
 Gupta, Neha, 1675  
 Gupta, Rashmi, 655  
 Gupta, Shivani, 445, 2095  
 • Guralnik, Jack, 355, 535, 965, 1135, 1425, 1450, 1560  
 Gure, Tanya, 1805  
 Gurney, Burke, 265  
 • Gurwitz, Jerry, 210  
 Gur-Yaish, Nurit, 920  
 Guse, Clare, 600  
 Gustafson, David, 410  
 Gustafson, Derek, 1820  
 Gustafson, Yngve, 1605  
 Gutierrez, Alyssa, 265  
 Gutierrez, Cassity, 1530  
 • Gwyther, Lisa, 655

## H

- Ha, Jinkyung, 1805  
 Ha, Jung-Hwa, 210  
 Haaga, John, 710, 780, 1445  
 Haas, Zachary, 500  
 Habermann, Barbara, 1650  
 Habermann, Ralf, 1045  
 Habtemariam, Daniel, 585  
 Hackett, Lewis, 895, 1635, 1905  
 Hadley, Evan, 1135, 1145  
 Haesner, Marten, 280, 350, 1620  
 Haeuchi, Yuka, 270  
 Hafner, Samantha, 610  
 Haga, Hiroshi, 1020, 1660  
 Hagen, Christine, 1880  
 Hager, Klaus, 665, 1675  
 Haglin, Lynn, 1635



- Hagood, Elizabeth, 155, 2270  
Hahn, Elizabeth, 230, 1640, 1895  
Hahn, Laura, 950  
Hahn, Sarah, 220  
Haighton, Catherine, 980  
Haigis, Marcia, 1850  
Hain, Debra, 450  
Hairi, Noran, 2145  
Hajduk, Alexandra, 230  
Hajjhashemi, Zahra, 635  
Hakoyama, Mikiyasu, 995  
Haldane, Victoria, 1870  
Halek, Margareta, 450  
• Haley, William, 220, 1365, 2245  
Halifax, Elizabeth, 1455  
Hall, Amanda, 1620  
Hall, Peter, 925  
Hall, Jeffrey, 1610  
Halpin, Sean, 610  
Halvorsen, Cal, 305  
Hamaguchi, Toshiko, 240  
Hamarta, Erdal, 590  
Hamers, Jan, 145, 210, 420, 545, 1280, 1420  
Hames, Elizabeth, 2270  
Hamill, Sharon, 600  
Hamilton, Toby, 915, 1800  
Hammer, Leslie, 2175  
Hammer, Marilyn, 175, 1505  
Hammersla, Margaret, 760  
Hampton, Michael, 265  
Han, Areum, 260  
• Han, Beth, 1385  
Han, Chul, 585  
Han, Gyounghae, 660, 1010  
Han, KyungHoon, 985  
Han, Ling, 770  
Han, Lulu, 272, 650, 1035, 1695  
Han, MeiLan, 270  
Han, Melissa, 585  
Han, Sae, 1645  
Han, Sooyoun, 405, 900  
Han, Wen, 272, 650  
Hancock, Gregory, 630, 1765  
Hanks, Roma, 1650  
Hanlon, Alexandra, 2045  
• Hanlon, Joseph, 1665  
Hanna, Courtney, 75  
Hanna, Gay, 440  
Hannum, Susan, 235, 1095  
Hansen, Ase-Marie, 2195  
Hansen, Bryan, 110, 1345  
Hansen, Thomas, 625  
Hanson, Heidi, 490  
• Happ, Mary, 1030, 1295  
Hardill, Irene, 1680  
• Hardy, Melissa, 220  
Harkness, Karen, 1970  
• Harlow-Rosentraub, Karen, 1840  
Harman, Jeffrey, 1050  
• Harootyan, Bob, 190, 280, 430  
Harrill, Ashley, 595, 1530  
Harrington, Anna, 1630  
Harrington, Charlene, 2290  
Harrington, Donna, 305  
Harris, Bette, 2070  
Harris, Frances, 570  
Harris, Lauren, 635  
Harris, Melodee, 555  
• Harris, Phyllis, 2215  
Harris, Ronald, 480  
Harris, Tamara, 355, 435, 535, 585, 775, 965, 1030, 1425, 1565, 1665, 1670, 1780, 1785, 1925, 2285  
• Harris-Kojetin, Lauren, 1400, 1435, 2115  
Harrison, Stephanie, 272  
Harrison, Tracie, 1325  
Harris-Wallace, Brandy, 1080  
Harrop-Stein, Christine, 225, 610  
Hars, Mélyny, 585  
Härter, Martin, 1050  
Hartley, Jordan, 1620  
Hartmann, Christine, 2045  
Hartmann, Hilke, 272  
Hartnett, Caroline, 115  
Hartzler, Andrea, 345, 505  
Harvey, Idethia, 600  
Harvey, Kimberley, 985  
Harvey, Sarah, 1665  
Hash, Kristina, 1635  
Haske-Palomino, Maureen, 905  
Hass, Barry, 280  
Hassan, Omar, 375  
Hasselbalch, Steen, 272  
Hassevoort, Luke, 1955  
Hassing, Linda, 630  
Hata, Ryosuke, 995  
Hauer, Klaus, 320  
Hauschildt, Katie, 2170  
Hausdorff, Jeffrey, 540, 1290  
Haustein, Sonja, 1525  
Hautzinger, Martin, 320, 1670  
Havig, Anders, 545  
Havlik, Richard, 835  
Hawkins, Kevin, 1015  
Hawkley, Louise, 725  
Hayami, Yuko, 90  
Hayes, David, 1680  
Hayman, Kimberly, 1255  
Hay-McCutcheon, Marcia, 625  
• Hayslip, Bert, 225, 630, 735, 1765  
Hayward, Hannah, 310  
Hayward, Mark, 325  
Hazuda, Helen, 270  
He, Hua, 1215  
He, Qimei, 150, 965  
Headley, Catherine, 1000  
Hearld, Larry, 205, 445  
Heath, Barbara, 210, 1945  
Heaven, Ben, 1935  
Heckbert, Susan, 170  
• Heckhausen, Jutta, 2260  
Hedegaard, Holly, 1950  
Hedges, Dawson, 965  
Hediger, Hannele, 645  
Heer, Martina, 1570  
Heeren, Timothy, 225, 2070  
Heid, Allison, 1240, 2030, 2150  
Heinik, Jeremia, 230  
Heinonen, Ari, 540  
Heinz, Melinda, 825, 1620  
Heislein, Diane, 2070  
Hekler, Eric, 615  
Helfit, Paul, 1650  
Helzner, Elizabeth, 775  
Hemphill, Rachel, 1260, 2240  
Henderson, Charles, 590, 800  
Hendriks, Marike, 2035  
Hendrix, Cristina, 655, 995  
Henkel, Linda, 1730  
Henkens, Kène, 885, 1010  
Hennon, John, 365, 1635, 1945  
Henrie, James, 240, 1095, 1625  
Hensley, Robert, 615  
Henwood, Benjamin, 2110  
Heo, Jinmoo, 260  
• Hepburn, Kenneth, 595, 1755, 2180  
Hepworth, Joseph, 1125, 1455  
Herbers, Stephanie, 655, 1470  
Herbert, Matthew, 1660  
• Herd, Pamela, 1380  
Herman, Talia, 540  
Hernandez, Anna, 1355  
Hernandez, Elise, 590, 680  
Herr, Keela, 2085, 2120  
Herrera, Angelica, 1125  
Herrington, David, 1990  
Herrmann, François, 360, 585  
Hershey, Denise, 1505  
• Hershey, Douglas, 1010, 1485, 1645  
Hershey, Linda, 915, 1800  
• Hertzog, Christopher, 30, 840, 1645  
Hess, Lauren, 625  
• Hess, Thomas, 1485, 1630  
Heubner, Brooke, 925  
Hiatt, Shirin, 55  
Hicken, Bret, 225, 595, 1495, 1995  
Hickman, Susan, 1650  
Hicks, Gregory, 520  
Hicks, Stephanie, 990, 1645  
Hiersteiner, Dorothy, 1595  
Higashiura, Hiroshi, 1025  
• Higgs, Paul, 10, 200, 310, 1090  
High, Kevin, 1985  
Higuchi, Kathryn, 1675  
Higuchi, Mitsuru, 265  
Hildreth, Kerry, 1615  
Hiley, Chris, 310  
Hill, Carl, 710  
Hill, Emily, 1690  
Hill, LaBarron, 300, 1640  
Hill, Nikki, 1030  
Hill, Patrick, 620, 2260  
Hill, Robert, 280, 595  
Hill, Terrence, 510  
Hillcoat-Nalletamby, Sarah, 10  
Hiller, Deborah, 155  
Hilliard, Tandra, 750  
Hillier, Teresa, 1665, 1790  
Hillis, Erin, 620  
• Hillman, Jennifer, 1650  
Hilmer, Sarah, 270, 585, 1175, 1410, 1615, 1990  
Himmelsbach, Ines, 2005  
Hind, Jacqueline, 1150  
Hinde, Jesse, 2175  
Hinkin, Charles, 2265  
Hinrichs, Timo, 1580  
Hinson, Billy, 1675  
Hinton, Ladson, 1325  
Hirano, Hirohiko, 230, 590  
Hirayama, Ryo, 600, 970  
Hirose, Nobuyoshi, 2015  
Hirsch, Calvin, 170  
Hirsch, Jana, 2225  
• Hirschman, Karen, 590, 1970, 2045  
Hirshon, Jon, 1950  
Hitzig, Sander, 1005  
Hixson, Daniel, 1025  
Ho, Amy, 295  
Ho, Andy, 685, 1250  
Ho, Florence, 485  
Ho, Jeong-Hwa, 885  
Ho, Te-Ching, 1680  
Hoang, Chuong, 600  
Hobbs, Nicola, 1935  
Hoben, Matthias, 1155, 2290  
Hockey, Richard, 980  
Hodes, Richard, 1545, 1985  
Hodgins, David, 630  
• Hodgson, Nancy, 110, 1345  
Hoeschele, Ina, 1990  
• Hofer, Scott, 120, 1480, 1760, 1915, 1940, 2155  
Hoffman, Christine, 1300  
Hoffman, John, 490  
Hoffman, Lesa, 120  
Hoffmann, Kristine, 272  
Hoffmann, Wolfgang, 530  
Hofmann, Britt, 585  
Hogan, Patricia, 965, 1805  
Hojo, Christa, 1965  
• Holick, Michael, 1550  
• Holland, Diane, 240  
Holland, Jason, 240  
Holle, Bernhard, 530  
Holle, Daniela, 450  
Hollenbeak, Christopher, 2200  
Holley, Lyn, 1650, 1690  
Hollinger-Smith, Linda, 620  
Hollister, Brooke, 1710  
Holloway, Cynthia, 345, 2180  
Holly, Jeff, 650  
Holroyd, Ann, 1025  
Holroyd-Leduc, Jayna, 485  
Holt, Cheryl, 340  
Holt, Nicole, 1560  
Holtgrave, Peter, 665  
Hölttä, Eeva, 640  
Holzapfel, Andrew, 2090  
Hölzel, Lars, 1050  
Homer, Marcia, 365  
Honda, Takanori, 270, 1660  
Hong, Gwi-Ryung, 610  
Hong, Michin, 240  
Hong, S., 1615  
Hong, Seokho, 1645  
Hong, Seunghae, 240  
Hong, Song-lee, 655  
Hong, Zhen, 1275  
Hongo, Aileen, 85

- Honig, Lawrence, 1145  
 Hoogland, Aasha, 1760  
 • Hooker, Karen, 295, 620, 630, 845, 970, 2260  
 • Hooymann, Nancy, 665, 1960, 2120  
 • Hoppmann, Christiane, 295, 2030  
 • Horgas, Ann, 1660, 2085  
 Horn, Kevin, 490  
 Horn, Susan, 940  
 Horne, Benjamin, 490  
 Horne, Maria, 1575  
 Hornick, Thomas, 1025  
 Horn Mallers, Melanie, 1620  
 Hornyak, Robert, 2100  
 • Horowitz, Amy, 315, 975  
 Horton, Theresa, 2075  
 Horvath, Kathy, 1945  
 Horvath, Steve, 165  
 Horwitz, Briana, 2220  
 Horwitz, Reginaldo, 1275  
 Hoshino, Kazumi, 990  
 Hostein, Sally, 1620  
 Hoth, Karin, 1615  
 House, James, 2170  
 Houser, Ari, 2115  
 • Houston, Denise, 1565, 1785  
 Houston, Thomas, 985  
 Hovanes, Melissa, 525, 1030  
 Hovater, Martha, 220  
 Howanitz, Jennifer, 1690  
 • Howard, Darlene, 610, 625, 1625  
 Howard, James, 610, 625, 1625  
 Howard, Jennifer, 1465  
 Howard, Virginia, 385  
 • Howe, Judith, 365, 665, 1945, 1995  
 Howell, Doris, 2230  
 Howell, Timothy, 365  
 Howren, M., 630  
 Hoy-Ellis, Charles, 560  
 Hrybyk, Regina, 460, 1200  
 Hsu, Fang-Chi, 1565, 1640  
 Hsu, Hui-Chuan, 245, 615  
 Hsu, Li-Wen, 1055  
 Hsu, Yi-Hsiang, 2285  
 Hsueh, Kuei-hsiang, 600  
 Hu, Chao, 2250  
 Hu, Lu, 1620  
 Hu, Yi-Ling, 610  
 Huang, Chao-Hui, 215, 1630  
 Huang, Chiu-Hua, 655  
 Huang, David, 995  
 Huang, Jie, 245, 755, 1390, 1625  
 Huang, Jin, 640, 845, 2130, 2175  
 Huang, Ting-Ying, 1295  
 Huang, Yi, 1425  
 Hubbartt, Katarena, 210  
 • Huber, Lesa, 1530, 1635  
 Hudak, Sandy, 940  
 Hudgins, Gayle, 1635  
 Hudson, Jerry, 640  
 • Hudson, Rob, 575, 1600  
 Hudson, Shawna, 980  
 Hudson Castillo, Cassie, 665  
 Huffman-Oh, Patricia, 280, 665  
 Hugenschmidt, Christina, 1640  
 Hughes, Anne, 970, 1835  
 Hughes, Jaime, 1910  
 Hughes, Matthew, 1520  
 • Hughes, Susan, 590, 615, 1255  
 Hughson, Richard, 1570  
 Huh, Terri, 1370  
 Hui, Edward, 650  
 Huisman, Martijn, 1565, 1725, 1860  
 Huizer-Pajkos, Aniko, 585, 1615  
 Hulett, Denis, 2290  
 Hüll, Michael, 1050  
 Hülür, Gizem, 30, 2240  
 Humber, Katherine, 665, 990  
 Humble, Áine, 630, 1005  
 • Hummert, Mary, 465  
 Hung, Lillian, 1685  
 Hung, William, 365, 1945  
 Hunsaker, Amanda, 1620  
 Hunt, Marybeth, 1590  
 Hunter, Joseph, 1350  
 Hunter, Rebecca, 1070, 1605  
 Huohvanainen, Emmi, 1625  
 Hussey, Sophie, 265  
 Hutchison, Jenny, 1630, 1675  
 Huxhold, Oliver, 505, 995  
 Hvid, Lars, 355  
 Hwang, Eunju, 235, 425  
 Hwang, Seungyoung, 1020  
 Hyams, Adriana, 625  
 Hybels, Celia, 630, 1015, 1275  
 • Hyde, Joan, 1685  
 Hyde, Martin, 10, 1090  
 Hyde, Mary, 780  
 • Hyer, Kathryn, 275, 1050, 1680, 2095  
 Hygge, Staffan, 775  
 Hytner, Catherine, 105  
 Hyun, Dhawoon, 245, 970  
 Hyun, Jinshil, 1640
- I**
- Iafolla, Vanessa, 655  
 Iams, Howard, 1105  
 Ibrahim, Sarah, 635  
 • Idler, Ellen, 1140  
 Igarashi, Ayumi, 610  
 Igarashi, Heidi, 1640, 2250  
 Ihara, Emily, 155  
 Ihara, Kazushige, 230, 590  
 Ikebe, Kazunori, 272, 290, 610, 615, 990, 1150, 1360  
 Ikeda, Naoki, 90  
 Ikeuchi, Tomoko, 600  
 Ilich-Ernst, Jasminka, 1035  
 Iloputaife, Ikechukwu, 585  
 Imai, Satomi, 980  
 Imamatsu, Yuki, 970  
 Imel, Janna, 245  
 Imhof, Lorenz, 645, 1580  
 Imuta, Hiromi, 1020  
 Inada, Yuki, 1690  
 Inagaki, Hiroki, 272, 610, 985, 1360, 2015  
 Infurna, Frank, 15, 605, 675, 1020, 1510, 1860  
 • Ingersoll-Dayton, Berit, 590, 680, 1190, 1690  
 Ingram, Diana, 645  
 Ingram, Maia, 570  
 Inomata, Chisato, 1150  
 • Inouye, Sharon, 210  
 Intrator, Orna, 790  
 • Intrieri, Robert, 1630  
 Inuzuka, Go, 1660  
 Irani, Elliane, 225  
 • Iris, Madelyn, 480, 1300, 1455  
 Irvin, Carol, 2115  
 • Isaacowitz, Derek, 840, 1100  
 Isham, Andrew, 410  
 Ishida, Hiroshi, 1690  
 Ishii, Kenji, 1665  
 Ishimatsu, Kazuma, 625  
 Ishioka, Yoshiko, 610, 1360, 2015  
 Ishizaki, Tatsuro, 272, 290, 600, 610, 615, 990, 1685  
 Ishler, Karen, 1920  
 Isowa, Tokiko, 1025  
 Ito, Kae, 272, 625, 985  
 Ito, Shinji, 155  
 Ito, Tomoko, 265  
 Itoi, Waka, 970  
 Ivanova, Elena, 2250  
 Iveniuk, James, 725  
 Iverson, Brett, 410  
 Iwasaki, Wendy, 1945  
 Izumi, Kyoko, 1045
- J**
- Jablonski, Rita, 1275  
 Jacelon, Cynthia, 260  
 Jack, Max, 1685  
 Jackson, Adrienne, 1675  
 • Jackson, James, 25, 755  
 Jackson, Kimethria, 215  
 Jackson, Melanie, 655, 1650  
 Jacob, Mini, 170  
 Jacobs, Elizabeth, 650  
 Jacobs, Jeremy, 1670  
 Jacobs, Peter, 50, 1415  
 Jacobson, Nora, 940  
 Jacobson, Stephanie, 250  
 • Jagger, Carol, 135, 272, 910, 1235, 1935  
 Jakobs, Tom, 2270  
 Jamal, Siti, 2145  
 Jamerson, Brenda, 1640  
 James, Bryan, 890, 1390  
 James, Eric, 1665  
 Jang, Heejung, 1690  
 Jang, Jung, 210  
 • Jang, Yuri, 215, 245, 1620, 1910, 2265  
 Janicek, Sarah, 1125  
 Jarrell, Alyssa, 1615  
 Jarrín, Olga, 455  
 • Jarrott, Shannon, 630, 1625, 1650  
 Jason, Kendra, 750  
 Jastrzebski, Sandra, 2195  
 Jayadevappa, Ravishankar, 1020  
 • Jazwinski, S, 625  
 Jeffri, Joan, 80, 440  
 Jenkins, Susan, 2190, 2295  
 Jennings, Andrea, 210, 1945  
 Jensen, Laury, 525  
 Jeon, Gyeong-Suk, 980  
 Jeong, Eunseok, 210  
 Jeong, Seungwon, 1000  
 Jeong, Yu, 1640  
 Jerome, Gerald, 1775  
 Jessup, E., 1435  
 Jeswani, Sheena, 620, 990  
 • Jette, Alan, 1560, 1670, 2070  
 Jeune, Bernard, 360, 1065  
 Jian, Zaijin, 1695  
 Jiang, Da, 1625, 1715  
 Jiang, Guohe, 220  
 Jiang, Luohua, 1655  
 Jiang, Mengtian, 2160  
 Jiang, Nan, 660, 1055  
 Jiang, Yang, 1555  
 Jicha, Gregory, 272  
 Jimenez, Daniel, 25  
 Jimenez, Julieta, 1645  
 Jin, Bo, 272, 650, 1035, 1695  
 Jin, Haomiao, 1680  
 Jindo, Takashi, 265, 1660  
 Jivraj, Stephen, 2135  
 Jobin, Joelle, 15  
 Joe, Jonathan, 1620  
 Joehanes, Roby, 165  
 • Johansson, Boo, 630, 1510, 1915  
 Johnson, Andrew, 165  
 Johnson, Christopher, 445, 1050, 1140  
 Johnson, David, 1360  
 Johnson, Iona, 990  
 • Johnson, Jerry, 235  
 Johnson, Julene, 245  
 Johnson, Kaitlin, 1650  
 Johnson, Mary, 150, 615  
 Johnson, MyKala, 215  
 Johnson, Rebecca, 240, 875  
 Johnson, Richard, 430  
 Johnson, Ruby, 1435  
 Johnson, Susan, 1635  
 • Johnson, Thomas, 1850  
 Johnson, Wendy, 2220  
 Johnson-Lawrence, Vicki, 500, 590, 1110, 1725  
 Johnston, Deirdre, 625, 2035  
 Joiner, Raquael, 605  
 Jonas, Adam, 970  
 Jones, Brett, 585, 1615  
 • Jones, Constance, 990  
 Jones, Ian, 1090  
 Jones, Jacqueline, 975, 1525  
 Jones, James, 1685  
 Jones, Kim, 55  
 Jones, Kimberly, 1645  
 Jones, Lani, 1050  
 Jones, Leah, 265  
 Jones, Lilibeth, 1030  
 Jones, Mandi, 225  
 Jones, Mark, 925  
 Jones, Michael, 630  
 Jones, Sally, 1265

- Jones, Shatice, 1140  
 Jonsson, Palmi, 1425  
 Joo, Susanna, 1010  
 Joo, Wontak, 1920  
 Joo, Yoonmee, 1675  
 • Jopp, Daniela, 220, 605, 620, 825, 990, 1500, 1645, 2015  
 Jordan, Kerry, 2270  
 Jordano, Megan, 625  
 Joseph, Lyndon, 710  
 Jouldjian, Stella, 1910  
 Juang, Christine, 250  
 Juarez-Cedillo, Teresa, 270  
 Judd, Suzanne, 385  
 Judge, Katherine, 625, 1580, 2010  
 Judkins, Julianna, 410  
 Jun, Hey, 995, 1010  
 Jun, Jung, 635  
 June, Andrea, 1635  
 Jung, Eulho, 1635  
 Jung, Hye-Ji, 585  
 Jung, Seojung, 220, 620  
 Jung, Songee, 260  
 Jungerman, Joanna, 1140  
 Jungquist, Carla, 1045  
 Juola, Anna\_liisa, 1675  
 Justice, Amy, 1180  
 Justice, Jamie, 1615  
 Jutai, Jeffrey, 240  
 Juthberg, Christina, 545  
 • Jylhä, Marja, 845, 1065
- K**
- Kabayama, Mai, 260  
 Kabeto, Mohammed, 665  
 Kafle, Deepak, 615, 970, 1000  
 Kageyama, Kana, 1690  
 • Kahana, Boaz, 990, 1000, 1005, 1260, 1510, 1650  
 • Kahana, Eva, 990, 1000, 1005, 1260, 1510, 1650  
 Kahn, Robert, 1075  
 Kai, Ichiro, 495, 600  
 Kail, Ben, 1000  
 Kaiser, Robert, 1965  
 Kajitani, Shinya, 1900  
 Kalay, Ece, 705  
 Kamaruzzaman, Shahrul, 2145  
 Kamide, Kei, 260, 272, 290, 610, 615, 990, 1150, 1360  
 Kamil, Rebecca, 1785  
 Kammerer, Candace, 1145  
 Kampe, Karin, 320  
 Kan, Mari, 1900  
 Kanaya, Yukiko, 970, 1045  
 Kandira, Abdullah, 585  
 • Kane, Robert, 1285, 1440  
 • Kane, Rosalie, 1440, 1585  
 Kameda, Miyu, 90  
 Kaneko, Yoshihiro, 1020  
 Kaner, Eileen, 980  
 Kang, Duck-Hee, 272  
 Kang, HyunCheol, 260  
 Kang, Jeeun, 660  
 Kang, Suk-Young, 80, 590  
 Kang, Sunwoo, 1760  
 Kang, Taewoon, 2290  
 Kang, Youjeong, 240  
 Kania-Lundholm, Magdalena, 350  
 Kannus, Pekka, 540  
 Kansal, Nisha, 630  
 Kao, Hsueh-Fen, 2050  
 Kaplan, Daniel, 950, 1690  
 Kaplan, Mark, 1215  
 Kaplan, Sandra, 640  
 Karahan, Ali, 590  
 Karahan, Faika, 590  
 Karamcheva, Nadia, 430  
 Karashima, Junko, 970  
 Karasik, David, 2285  
 • Karasik, Rona, 615, 665  
 Kardol, Tinie, 235, 990, 1205  
 • Karel, Michele, 2045  
 Karinkanta, Saija, 540  
 Kariyawasam, Shivanti, 2270  
 Karlawish, Jason, 125, 1265  
 Karlin, Bradley, 2045  
 Karmarkar, Amol, 1665  
 Karon, Sarita, 95, 1435  
 Karp, Naomi, 550  
 Karpiak, Stephen, 1180, 1835  
 Karppinen, Helena, 1625  
 Karraker, Amelia, 2170  
 Karuza, Jurgis, 1030, 1635, 1665  
 Kaschak, Mary, 575  
 Kaskie, Brian, 665, 1215  
 Kaspar, Roman, 730, 1605, 2300  
 Kasper, Judith, 230, 845, 1445, 2130  
 Kasprow, Wes, 1540  
 Kassem, Ahmed, 1020  
 Katagiri, Keiko, 405, 590  
 Katsumata, Asako, 90, 655  
 Katula, Jeffrey, 1135  
 Katz, Anne, 85  
 Katz, Marian, 1580, 1675, 2110  
 Katz, Mindy, 272, 850, 1630, 1640, 1660  
 Katz, Mira, 970  
 Katz, Paul, 1635, 1665  
 Katz, Ronit, 170  
 Katz, Ruth, 2210  
 Kauffman, Danielle, 1775  
 Kaufmann, Christopher, 230, 480, 1555, 2130  
 Kaup, Migette, 130, 275, 2165  
 Kautiainen, Hannu, 640, 1675  
 Kauwe, John, 965  
 Kavé, Gitit, 860  
 Kawai, Hisashi, 230, 590  
 Kawakami, Ryoko, 265  
 Kawano, Yukari, 1015  
 Kawashima, Ryuta, 155  
 Kaye, Jeffrey, 50, 1360, 1415, 1480  
 • Kaye, Lenard, 1665, 1680  
 Kaynak, Hande, 890  
 Kazi, Paula, 335  
 Keady, John, 2215  
 Kearney, Keith, 1690  
 Keary, Sara, 1050  
 • Keating, Norah, 1740  
 Keefe, Bronwyn, 275  
 Keefe, Francis, 105  
 Keefe, Janice, 1055, 2290  
 Keevil, Brian, 650  
 Keglovits, Marian, 610  
 Kehinde, Augustine, 260, 645, 650  
 Keidser, Gitte, 775  
 Keith, Scott, 1480  
 Keller, Heather, 1150  
 Keller, James, 635, 1415  
 Kelley, Amy, 1140  
 Kelley, Susan, 735  
 • Kelley-Moore, Jessica, 705, 1220, 1725, 1910, 2275  
 Kellogg, Dean, 370  
 Kelly, Amanda, 120, 1940  
 Kelly, Christopher, 1690  
 • Kemnitz, Joseph, 585  
 • Kempen, Gertrudis, 145, 320, 1245, 2035, 2035  
 Kenaley, Bonnie, 280, 1845  
 • Kendig, Hal, 1220, 1605, 1870, 2145  
 Kenien, Cara, 415  
 Kenlan, Dasha, 272  
 Kennedy, Erin, 990  
 Kennedy, Richard, 1295  
 Kennelty, Korey, 1185, 1950  
 Kennison, Robert, 625  
 Kenny, Michael, 630  
 Kenyon, Virginia, 1050, 1620  
 Kergoat, Marie-Jeanne, 2185  
 Kershaw, Kiarri, 755  
 Kershaw, Trace, 2030  
 Kerssens, Chantal, 555, 1620  
 Kessler, Eva-Marie, 625  
 Kessler, Pat, 210  
 Keusch, Florian, 875  
 Key, Taylor, 755  
 Khanal, Ganesh, 220  
 Khang, Tounhia, 650  
 Khasawinah, Sarah, 1690  
 Khatutsky, Galina, 1435  
 Khokhar, Bilal, 1020, 1920  
 Khoo, Selina, 2145  
 Khosla, Nidhi, 1050  
 Kiefe, Catarina, 230  
 Kiehne, Emily, 235  
 • Kiel, Douglas, 165, 2285  
 Kiely, Kim, 1235  
 Kietzman, Kathryn, 1330  
 Kietzmann, Katie, 655  
 Kiho, Sung, 970  
 Kilgore, Meredith, 640, 1535  
 Kim, Bon, 620, 980, 1050, 1645  
 Kim, BoRin, 160, 625, 1075  
 Kim, Cheol-Ho, 1665  
 Kim, Eunhae, 280  
 Kim, Geun, 645  
 Kim, Giyeon, 25, 215, 245, 625, 980, 1680, 1895  
 Kim, Heejung, 610, 1650  
 Kim, Hogene, 925  
 Kim, Hwasoon, 220  
 Kim, Hyejin, 1295  
 Kim, Hyungsoo, 1055  
 Kim, Hyun-Jun, 2205  
 Kim, Jae-Yong, 585  
 Kim, Jeong, 260  
 Kim, Jongku, 995  
 Kim, Jung-Hyun, 345  
 Kim, Junhyoung, 260  
 Kim, Kwang-il, 1665  
 Kim, Kyeongmo, 280, 980, 1680  
 Kim, Kyounghae, 110  
 Kim, Kyungmin, 35, 220, 1240, 1510  
 Kim, Mee, 240  
 Kim, Meeryoung, 505, 600  
 Kim, Mi-Jung, 585  
 Kim, Miyong, 1910, 2265  
 Kim, Myoung, 995  
 Kim, Sang, 585  
 Kim, Seong-Min, 585  
 Kim, Seoyoung, 1640  
 Kim, Seungyoung, 225  
 Kim, So-Hee, 585  
 Kim, Soyeon, 280, 980, 1680  
 Kim, Suhyun, 1665  
 Kim, Sujee, 1115, 1260  
 Kim, Suyeon, 585  
 Kim, Yojin, 625  
 Kim, Younong, 980  
 Kim, Youseuh, 590  
 Kimberly, Laura, 1190  
 Kimura, Misaka, 270  
 Kind, Amy, 525, 1030, 1950  
 • King, Abby, 1135  
 King, Barbara, 1025, 1950  
 King, Deborah, 610  
 King, Jonathan, 1335, 2220  
 King, Lindsay, 1010  
 King, Neal, 1625, 1645  
 King, Paul, 210  
 • Kingston, Eric, 1320  
 Kingston, Andrew, 135, 1235  
 • Kinney, Jennifer, 950  
 Kinney, Kirby, 610  
 Kipfer, Stefanie, 1580  
 Kiptanui, Zippora, 1020, 1920  
 Kirichenko, Nataliya, 1615  
 Kirkendall, Abbie, 240  
 Kirkland, James, 100, 1700  
 Kirkwood, Thomas, 135, 272, 910  
 Kita, Motoko, 1025  
 Kitano, Naruki, 265, 650, 1660  
 Kitch, Stephanie, 2270  
 Kitchner-Triolo, Melissa, 210  
 Kittle, Krystal, 1000  
 Kitzenberg, David, 1850  
 Kivimaki, Mika, 1255  
 • Kivnick, Helen, 2315  
 Kjekshus, Lars, 545  
 Klaassen-Mielke, Renate, 1580  
 Klassen, Ann, 235  
 Klaus, Hager, 1035  
 • Kleban, Morton, 1300  
 Klein, Barbara, 1675  
 Klein, Diana, 320  
 Klein, Kelsey, 305  
 Klein, Laura, 1640  
 Klein, Ronald, 1675  
 Kleindorfer, Dawn, 385  
 Kleppinger, Alison, 1020, 1980  
 Kleynen, Melanie, 145  
 Kliegel, Matthias, 1255  
 Klima, Dennis, 1665

- Klimmek, Rachel, 1055, 2130  
 Klindtworth, Katharina, 1035  
 Klinedinst, N., 1980  
 Kling, Joanna, 1010  
 Klinger, Julie, 1620, 1635  
 Kloseck, Marita, 1685, 1690  
 Knapp, Mollie, 990  
 Knechel, Nancy, 1680  
 • Knight, Bob, 225, 250  
 Knight, Christopher, 265  
 Knight, Stacey, 490  
 Knoefel, Janice, 915, 1800  
 Knopman, David, 775  
 Knott, Carmilla, 555, 1620  
 Knowles, Rachel, 1665  
 Ko, Eunjeong, 1970  
 Ko, Han-Jung, 620, 630, 970  
 Ko, Jisook, 1910  
 Ko, Jung, 1920  
 Ko, Michelle, 2290  
 Ko, Seung-uk, 1775  
 Kobayashi, Erika, 275, 590, 1050  
 Kobayashi, Hiroyuki, 260  
 Kobayashi, Karen, 55  
 Kobayashi, Kimi, 1665  
 Kobylarz, Fred, 2305  
 Kochersberger, Gary, 365  
 Kodama, Hiroko, 970, 1685  
 Kodwo-Nyameazea, Yale, 2265  
 Koehly, Laura, 1765  
 Koenig, Gary, 430  
 Koenig, Susanne, 2250  
 Koerner, Kari, 1125, 1455  
 Koffer, Rachel, 675, 1630, 1640  
 Koh, Eun, 1395  
 Koh, Seung-hahn, 425  
 Kohanski, Ronald, 1475  
 Kohler, William, 585  
 Kohn, Nina, 1055  
 Kohon, Jacklyn, 660, 990  
 Koike, Teruhiko, 1615  
 Koin, Diana, 1675  
 Kojola, Erik, 750  
 Kok, Almar, 1725  
 • Kolanowski, Ann, 1030  
 Kolbe, Jens, 1375  
 Koll, Alexandra, 210  
 Koller, Akos, 585, 965  
 Koltover, Vitaly, 585  
 Komelski, Matthew, 1255  
 Kondo, Katsunori, 1000  
 Konetzka, R., 1820, 1980  
 Kong, Dexia, 215, 590  
 Kong, Jooyoung, 1005, 1115  
 Kong, Tao, 1685  
 König, Hans-Helmut, 1050  
 Konnert, Candace, 2180  
 Kono, Ayumi, 240, 970, 1045  
 Konopik, Nadine, 2005, 2300  
 Kontos, Pia, 1045  
 • Kopera-Frye, Karen, 480, 665, 1030  
 Kopits, Ilona, 1670  
 Kopko, Kimberly, 2055  
 Kopusko, Janet, 1010, 1645  
 Korang-Okrah, Rose, 600  
 Korczyn, Amos, 272  
 Koren, Chaya, 655  
 Kornadt, Anna, 1875  
 Korstanje, Ron, 165  
 Korten, Nicole, 2155  
 Koss, Catheryn, 885, 1055  
 Kosteniuk, Julie, 210  
 Koster, Annemarie, 535, 585, 1665, 1925  
 Kotter-Gruehn, Dana, 465  
 • Kovach, Christine, 1810  
 Kowal, Paul, 405, 605, 985, 1015  
 Kozlov, Elissa, 240  
 Kozono, Marina, 1500  
 Kramarow, Ellen, 1950  
 • Kramer, B., 1580, 1675, 1945, 1995  
 Kramer, Birgit, 2005  
 Kramer, Ian, 2100  
 Kramer, John, 1365  
 Krampe, Jean, 1660  
 Krannitz, Morgan, 1630  
 Kranz Graham, Eileen, 120, 1625, 2260  
 Kraus, Barry, 1580, 1675  
 Kraus, Frank, 585  
 Krause, Olaf, 1675  
 Krauss, Kaitlyn, 1730  
 Krais-Schuman, Cynthia, 1370  
 Kravchenko, Julia, 385  
 Krebs, Keylse, 265  
 Krekel, Christian, 1375  
 Kreko, Tabita, 585  
 Krekula, Clary, 470  
 Kreling, David, 1950  
 Kremen, William, 1085, 1920  
 Kremer, Ian, 2090  
 Kresevic, Denise, 210, 1945  
 Kris, Alison, 1730  
 • Kritchevsky, Stephen, 170, 355, 810, 1015, 1135, 1195, 1565, 1990, 2195  
 Krok, Jessica, 215  
 Kronen, Ashley, 1050  
 Krueger, Diane, 1670  
 Kruger, Daniel, 610  
 Kruger, Tina, 665  
 Krupka, Simon, 675  
 Kruse, Andreas, 1620, 2015, 2290  
 Kubota, Sayaka, 240  
 Kubzansky, Laura, 630, 2255  
 Kuchel, George, 2195  
 Kueider, Alexandra, 610, 1480  
 Kuerbis, Alexis, 305, 1555  
 Kuh, Diana, 650, 1480  
 Kuhlke, Jade, 1010  
 Kuhn, Latoya, 665  
 Kühn, Simone, 1375  
 Kuk, Nienke, 145  
 Kulinski, Kristie, 1655, 1845  
 Kulkarni, Kshitija, 1665  
 Kulminski, Alexander, 965, 1060, 1145, 2195  
 Kumagai, Shuzo, 270, 1660  
 Kumar, Amit, 650, 1665  
 Kumar, Renu, 555, 1620  
 Kunik, Mark, 1370, 1580  
 Kunisada, Mika, 1690  
 • Kunkel, Suzanne, 190, 345, 575, 2105, 2295  
 • Kunzmann, Ute, 795  
 Kuo, Tony, 280, 1020, 1050  
 Kuo, Tsuann, 1055  
 Kuo, Yen-Ku, 1680  
 Küpper, Michaela, 320  
 Kurlinski, Laura, 1560  
 Kursewicz, Christina, 1050, 1265  
 Kusmaul, Nancy, 1690  
 Kuteesa, Monica, 1180  
 Kuti, Julia, 965  
 Kutner, Jean, 1050  
 Kvale, Elizabeth, 220, 1630  
 Kwak, Jung, 1265  
 Kwak, Minyoung, 1690  
 Kwok, Kent, 1565  
 Kwok, Dorothy, 685  
 Kwok, Timothy, 485, 1395  
 Kwon, Hyun, 425, 990  
 Kwong, Katherine, 160  
 Kydd, Angela, 1155, 1455  
 Kyvik, Kirsten, 475
- L**
- Laakkonen, Marja-Liisa, 640, 1625  
 Labault-Cabeza, Nirzka, 280  
 Laceulle, Hanne, 1310  
 • Lach, Helen, 320, 1195, 1665  
 • Lachman, Margie, 230, 465, 620, 1640  
 Lachs, Mark, 1890  
 LaCroix, Andrea, 525, 1405  
 Laditka, James, 215, 605, 615, 985, 995, 1235  
 • Laditka, Sarah, 215, 605, 615, 985, 995, 1235  
 Lagace, Martine, 1050  
 Lages, Solange, 1020, 1660  
 Laguna, Jeff, 240, 1040  
 Lai, Angel, 1055  
 Lai, Daniel, 1470  
 Lai, Jennifer, 272  
 Lain, David, 1735  
 Lake, Eileen, 905  
 Lam, Kwongwing, 245, 985, 1625, 1640  
 LaMartin, Kimberly, 1365  
 Lamb, Sarah, 1830  
 Lambert, Dawn, 1980  
 Lamoureux, Erin, 260  
 Lamura, Giovanni, 855  
 Land, Kenneth, 2195  
 Landerman, Lawrence, 1015, 1275  
 Landes, Ann, 1085  
 Landes, Scott, 1085, 1365  
 Landry, Chenoa, 600  
 Lane, Nancy, 2060  
 • Lang, Frieder, 210, 675, 1625, 1640  
 Lang, Thomas, 1565  
 Langa, Kenneth, 665, 2100, 2170, 2245  
 Langdon, Jacqueline, 585  
 Lange, Jean, 1040  
 Lange-Maia, Brittney, 355  
 Langley, Linda, 630  
 Lanz, Kathryn, 1635  
 Lapham, Susan, 505  
 Lapidos, Stan, 1965  
 Lara, Jose, 1935  
 Larbi, Anis, 585  
 Larimer, Nicole, 50, 1360, 1415  
 LaRocca, Michael, 980  
 LaRose, Bob, 2160  
 Larson, Elaine, 1045, 1430  
 Larson, Martin, 1665  
 Larson, Michael, 965  
 Lashen, Hany, 650  
 Latham, Kenzie, 725, 2170  
 • Latham, Nancy, 1560, 2070  
 Lau, Mandy, 195, 685  
 Lau, Sin-Tung, 1785  
 Lau, Yukiko, 640  
 Laudate, Corina, 305  
 Launer, Lenore, 585  
 LaVeist, Thomas, 880  
 Lavin, Robert, 1675  
 Law, Andrew, 925  
 Law, Jessica, 1650  
 Lawson, Molly, 455  
 Lawton, Pamela, 80  
 Laxton, Brewster, 1025  
 Lazar, Amanda, 155  
 Leach, Corinne, 1885  
 Leal, Isabel, 620, 995  
 Leasure, J., 272  
 LeBlanc, Allen, 250, 1540  
 Leblanc, Marie-Eve, 1155  
 Lebrão, Maria, 260  
 Lecey, Valeree, 410  
 Leclerc, Annette, 1010  
 Le Couteur, David, 585, 1615  
 Lee, Annie, 1020  
 Lee, Beom, 2265  
 Lee, Chae, 615, 970, 975, 1645  
 Lee, Chaiwoo, 2005  
 Lee, Chin, 1755  
 Lee, Christopher, 525  
 Lee, David, 1805  
 Lee, Deidre, 610  
 Lee, Eun, 995, 1395  
 Lee, Eun-Young, 1615  
 Lee, Ga, 1045  
 Lee, Haejung, 610, 1020  
 Lee, Hedwig, 755  
 Lee, Hyunjoo, 625  
 Lee, Hyun-Jeong, 990  
 Lee, Hyunkee, 970  
 Lee, Ivy, 650, 1055  
 Lee, Jaeseok, 630  
 Lee, Jeung, 1000, 1260, 1510, 1650  
 Lee, Jieun, 585, 1670  
 Lee, Jina, 1920  
 Lee, Jinkook, 1870, 2135  
 Lee, John, 410  
 Lee, Joseph, 1145  
 Lee, Joshua, 1130  
 Lee, JuHee, 1665  
 Lee, Juyoung, 1910  
 Lee, KyoungHag, 590, 1630  
 Lee, Kyuho, 825  
 Lee, Kyung, 1275  
 Lee, Lewina, 272, 615, 630  
 Lee, Pearl, 1805  
 Lee, Sangcheol, 580  
 Lee, Sei, 1455  
 Lee, Seo-yeon, 425

- Lee, Soomi, 675, 1640  
Lee, Sun, 1920  
Lee, Sunghee, 985  
Lee, Yeonjung, 1685  
Lee, Yeon-Shim, 590, 1630  
Lee, Yong-Mi, 645  
Lee, Yooumi, 2055  
Lee, Youjung, 1650, 2020  
Lee, Young, 220  
Lee, Yura, 985, 1900  
Leeuw, Thomas, 585  
Leff, Bruce, 1110, 1450, 2000  
Lefler, Leanne, 1255  
Leger, Kate, 1640  
Leggett, Amanda, 1640, 2170  
Lehning, Amanda, 565, 1075, 1450, 1840  
Lehr, Marcus, 585  
Lekhakh, Nirmala, 600, 645, 1020  
Leland, Natalie, 1185  
Lemaster, Philip, 1485  
Lemke, Jason, 1530  
Lendon, Jessica, 1225  
Lenker, James, 240  
Lensing, Shelly, 1040, 1255  
Lent, Jaia, 2020  
León, Henry, 1660  
Leo-Summers, Linda, 770  
Le Page, Aurélie, 585  
Lepore, Michael, 275  
Leppa, Carol, 1045  
Le Prell, Colleen, 585  
Lera, Lydia, 272, 970, 1015, 1030  
Leson, Suzanne, 750  
Levasseur, Mélanie, 875  
Leveille, Suzanne, 1560, 1675  
Levenson, Michael, 2250  
Levin, Solomon, 1650  
Levine, Lane, 565  
Levine, Morgan, 475  
Levine, Sharon, 1635  
• Levy, Becca, 995, 1875, 2030  
Levy, Daniel, 165  
Lewin, Gill, 1245  
Lewinson, Terri, 1075, 1170  
Lewis, Alexandria, 510  
Lewis, Jordan, 590, 1495, 1830  
Lewis, Valerie, 1165  
Leykum, Luci, 920  
Li, Chengyue, 245, 830, 985, 1390, 1640, 1855  
Li, Cheng-Lun, 890  
Li, Fei, 1680  
Li, He, 230  
Li, Hong, 240, 590  
Li, Houmin, 635  
Li, Jian, 2140  
Li, John, 260  
Li, Juan, 980  
Li, Junxin, 1045  
Li, Karen, 230, 1785  
• Li, Lydia, 195, 1050, 1720  
Li, Rui, 980  
Li, Tan, 880  
Li, Xiaoying, 1695  
Li, Yawen, 755, 830, 985, 1720, 1855  
Li, Yuekang, 660, 1050  
Li, Yun, 640  
Liang, Dong-Ke, 1035, 1695  
• Liang, Jersey, 160, 275, 590, 1010, 1015, 1050, 1275  
Libonati, Joseph, 1030  
Lichstein, Kenneth, 980  
• Lichtenberg, Peter, 250, 1690  
Lida, Kerry, 1465  
Liebert, Melissa, 605, 985, 1015  
• Liebig, Phoebe, 990  
Lien, Laura, 280, 2165  
Ligon, Mary, 990, 1730  
Lim, Yeon, 625  
Lim, Young, 610, 995  
Lin, Feng, 272  
Lin, Frank, 570, 775, 1785  
Lin, Haiqun, 385  
Lin, I, 245, 985  
Lin, Jieli, 705, 1910  
Lin, Ju-Ping, 655  
Lin, Li-Chan, 615  
Lin, Shun-Tzu, 1680  
Lin, Yi-Hsiu, 1055  
• Lincoln, Karen, 395  
Lindberg, Brian, 390, 805, 1460  
Lindeman, Cliff, 975  
Lindemer, Andrea, 275  
• Lindenberger, Ulman, 840, 1375  
Lindley, Gabrielle, 245  
Lindwall, Magnus, 120  
Ling, Jonathan, 980  
Ling, Shari, 1185  
Lingler, Jennifer, 1030, 1620, 1690  
Linklater, Stefanie, 1155  
Linnebur, Sunny, 1615  
Linser, Paul, 585  
Liou, Chiou-Fang, 645  
Lipman-Schiby, Sharon, 655  
• Lipsitz, Lewis, 515, 585  
Lipton, Elizabeth, 970  
Lipton, Richard, 272, 850, 1630, 1640, 1660  
Lissauer, Matthew, 270  
• Lithgow, Gordon, 1475  
• Litwin, Howard, 45, 970  
Liu, Chang, 405  
• Liu, Chiung, 265  
Liu, Christine, 1665  
Liu, Chuan-Fen, 1580  
Liu, Darren, 1010, 2105  
Liu, Hangsheng, 960  
Liu, Hao, 640  
Liu, Hongjun, 1615  
Liu, Hui, 325  
Liu, Jia, 1720  
Liu, Jing, 1035  
Liu, Jinyu, 195, 755, 1050, 1720  
Liu, Jodi, 2090  
Liu, Kai, 965  
Liu, Pi-Ju, 480, 665  
Liu, Rude, 2250  
Liu, Stephen, 1025  
Liu, Tian, 1375  
Liu, Wen, 240, 1915  
Liu, Xinggang, 1920  
Liu, Yin, 220  
Liu, Ying, 625  
Liu, Yongmei, 1990  
Liu, Yujun, 280  
Livermore, Michelle, 1050  
Livingstone, Ian, 605, 615, 970  
Livsey, Lynne, 200  
Llanque, Sarah, 600  
Lo, Alexander, 385, 1295  
Lo, Lawrence, 1910  
Lobo, Alexandra, 640  
• Locher, Julie, 1150, 1535  
Lock, Sarah, 785  
• Loeb, Susan, 2200  
Loeckenhoff, Corinna, 1485  
Loeffler, Hillary, 95  
Loeser, Richard, 1565  
Loewenstein, David, 1755  
Logan, Sreemathi, 1615  
• Logsdon, Rebecca, 155, 1070  
Loh, Feng-Hua, 1050  
Loh, Vanessa, 2145  
Lohman, Kurt, 1990  
Lois, Nadia, 820  
London, Andrew, 835, 1085  
Long, Katherine, 990  
Longstreth, Will, 70, 1360  
Loock, Josephine, 1610  
Looze, Jessica, 275  
Lopez, Erick, 1645  
Lopez, Javier, 1755, 1770  
Lopez, Oscar, 965, 1135  
Lopez, Ruth, 765  
Lopez-Jimenez, Francisco, 650  
Lopez-Ortega, Mariana, 2050  
Lor, Maichou, 650  
Loreck, David, 370  
Loretto, Wendy, 470, 1735  
Lorig, Kate, 1655  
Lorini, Chiara, 1030  
Losada, Andrés, 1225, 1755, 1770  
Loterstein, Amy, 1455  
Lou, Vivian, 195, 405, 685  
Loughlin, Dawn, 1315  
Lovegreen, Sarah, 665  
Lovelace, Lauren, 220  
Low, Lee-Fay, 1045  
Lowe, Deborah, 1520  
• Lowenstein, Ariela, 35  
Lowton, Karen, 310  
Loynachan, Emily, 585  
Lozano, Cecil, 280  
Lu, Feng-Ping, 1045  
Lu, Pau-Ching, 280, 980  
• Lubben, James, 395  
Luborsky, Mark, 1830  
Lucas, Judith, 960, 1295  
Lucas, Katherine, 95, 2125  
Lucena, Rita, 265  
Lucke, Kathleen, 265  
Luckens, Ellen, 900  
Ludke, Ryan, 235  
Ludwig, Michael, 1850  
Lueckenotte, Anette, 1430  
Luger, Tana, 985  
Lui, Li-Yung, 1540, 1665, 1790  
Lukas, Albert, 320  
• Lum, Terry, 195, 685, 1055, 1250, 1870  
Lum, Wesley, 1465  
Luna, Nora, 240  
• Lund, Dale, 600  
Lund, Rikke, 2195  
Lundberg, Lydia, 845  
Lundblad, Jennifer, 1440  
Lunderborg, Dawn, 260  
Lunetta, Kathryn, 165  
Lunsford, Beverly, 65  
Luo, Hao, 1055, 1870  
Luo, Jianfeng, 1275  
Luo, Jun, 640  
Luong, Gloria, 1100, 2255  
Luptak, Marilyn, 225, 280, 595, 610, 1620  
• Luszczyk, Mary, 30, 1235  
Lutowski, Jennifer, 665  
Lutz, Julie, 1215  
Luukkaala, Tina, 1065  
Luy, Marc, 980  
Luz, Clare, 960, 2125  
Lv, Chenlong, 230  
Lyass, Asya, 1665  
Lydecker, Janet, 1635  
Lyketsos, Constantine, 210, 625, 745, 1810, 2035  
Lynch, Miranda, 1980  
• Lynch, Scott, 2040  
Lyon, Bethany, 625  
Lyons, Jennifer, 225  
• Lyons, Karen, 55, 220  
Lyons, Michael, 1085  
Lyu, Jiyoung, 605

## M

- Ma, Sina, 650  
Ma, Xiaodong, 1630  
MacCarthy, Daniel, 370  
Macchi, Loredana, 1670  
Macdonald, Karen, 1645  
MacDonald, Maurice, 290, 615  
MacDonald, Stuart, 30  
Mach, John, 585, 1615  
Machado, Maria, 965, 1575  
Machielse, Anja, 2235  
Maciel, Alvaro, 1665  
MacIntosh, Bradley, 630  
Mack, Laurin, 590  
MacKinlay, Elizabeth, 140, 340  
Maclean, Mark, 920  
MacLeod, Catherine, 1230  
Macmillan, Kelley, 460  
MacPhail, Catherine, 1180  
Madden, Laura, 1025  
Madden-Baer, Rose, 455  
Madeira, Francilene, 1660  
Maeda, Yoshinobu, 1150  
• Magaziner, Jay, 2070  
Mager, Diana, 1040  
Magett, Elizabeth, 1980  
Maggioncalda, Julie, 1975  
Magidson, Phillip, 1950  
Maglione, Jeanne, 2060  
Magnowski, Audrey, 965  
Mahaffie, Kathryn, 265  
Mahaney-Price, Ann, 1040  
Mahmood, Atiya, 1260, 2005, 2300  
Mahon, Jessica, 995  
Mahoney, Colin, 245  
• Mahoney, Diane, 280

- Mahoney, Edward, 280
- Mahoney, Ellen, 1315, 2115
  - Mahoney, Jane, 410, 540, 1025
  - Mahoney, Kevin, 665, 1195, 1300, 1315, 1960, 2115
  - Mahoney, Rebekah, 585
  - Mahrer-Imhof, Romy, 645
  - Maidan, Inbal, 540, 1290
  - Maiden, Robert, 280, 735
  - Maierhofer, Roberta, 1815
  - Mailick, Marsha, 205
  - Mair, Christine, 2105
  - Maitland, Scott, 630, 1150
  - Majumder, Atreyee, 1885
  - Mak, Wingyun, 210
  - Makris, Ioannis, 230
  - Maldjian, Joseph, 1640
  - Malek, Melanie, 1690
  - Malhotra, Rahul, 755
  - Mallick, Nabeel, 1510
  - Mallow, Jennifer, 220
  - Malmstrom, Theodore, 320
  - Malo, Nathalie, 2185
  - Malone, Marilyn, 530
  - MaloneBeach, Eileen, 235, 995
  - Man-Son-Hing, Malcolm, 1525
  - Manalel, Jasmine, 1355
  - Manche, Cameron, 610
  - Manchester, Julianne, 1055
  - Mandiola, Katarina, 605
  - Mandl, Stella, 1185
  - Mangione, Carol, 1125
  - Mangione, Kathleen, 265, 800
  - Manini, Todd, 1030, 1135
  - Manly, Jennifer, 985
  - Mann, Janice, 240
  - Mann, William, 210, 915
  - Manning Dantis, Jacquelyn, 590, 600, 990
  - Manning, Lydia, 340, 1000, 1745
  - Manor, Brad, 585
  - Manson, JoAnn, 1805
  - Manzi, Gabriel, 1675
  - Mao, Weiyu, 755
  - Maramaldi, Peter, 1055, 1845
  - Marcantonio, Edward, 2195
  - Marchiondo, Lisa, 1680
  - Marchionni, Niccolò, 1030, 1670
  - Marcione, Nicole, 155, 615, 2270
  - Marcum, Christopher, 1765
  - Marcum, Zachary, 1665
  - Marcus, Esther-Lee, 1265
  - Margeotes, Krystyn, 995
  - Margrett, Jennifer, 970, 2030
  - Mari, Lélia, 129
  - Marier, Allison, 1845
  - Marinelli, Elena, 1620
  - Marini, Christina, 610
  - Markides, Kyriakos, 600, 650, 1195, 1865
  - Markle-Reid, Maureen, 635, 1675
  - Marmstål Hammar, Lena, 210
  - Marques, Elisa, 965
  - Marques, Luciene, 265
  - Marquez, Carlos, 272, 1015, 1030
  - Marquez, Celine, 1035
  - Marquez, David, 615, 1000, 1125, 1605
  - Marquez-González, Maria, 1225, 1755, 1770
  - Marrone, Nicole, 570
  - Marsala, Miles, 980
  - Marsh, Anthony, 1015, 1135
  - Marshall, Alan, 2135
  - Marshall, Gillian, 215, 660
  - Marshall, Jaclyn, 2210
  - Marshall, Mary, 1625
  - Marshall, Shawn, 1525
  - Marsiske, Michael, 1000
  - Marson, Daniel, 1640
  - Marta, Cecilia, 585
  - Martin, Catherine, 375, 1555
  - Martin, Diane, 620
  - Martin, Fabiola, 1035
  - Martin, George, 380
  - Martin, Ignacio, 2015
  - Martin, Jennifer, 1910
  - Martin, Kathryn, 1785
  - Martin, Katie, 1665
  - Martin, Lauren, 280
  - Martin, Mike, 970
  - Martin, Peter, 150, 290, 615, 825, 970, 1500, 1620, 1625, 1645, 2015
  - Martin, Shadi, 215
  - Martina, Camille, 1635
  - Martinez, Carlos, 270
  - Martinez, Iveris, 880
  - Martinez, Valeria, 215
  - Martins, Bruna, 1630
  - Martins, Pamela, 910, 1015
  - Martinson, Marty, 1680
  - Martire, Lynn, 1260, 2240
  - Maruo, Satomi, 90
  - Marvin, Alison, 1650
  - Marx, Katherine, 110, 915, 1345
  - Marx, Marcia, 210
  - Marx, Ruth, 100
  - Masakazu, Sirasawa, 995
  - Masaki, Kamal, 150, 965, 1945
  - Maschi, Tina, 85, 280, 1005, 1170, 1610, 2200
  - Maserejian, Nancy, 1550
  - Maslow, Katie, 530
  - Massaro, Joseph, 1665
  - Massimo, Lauren, 1810
  - Mast, Benjamin, 140, 625
  - Mast, Merle, 665
  - Masuda, Kazutaka, 995
  - Masuda, Seiko, 90, 90
  - Masui, Yukie, 272, 290, 615, 990, 1150, 1360, 2015
  - Matalenas, Laura, 1620
  - Matchar, Bobbi, 655
  - Matchar, David, 1870
  - Mathei, Catharina, 965, 1670
  - Matheny, Michael, 1615
  - Mather, Mara, 230, 1630
  - Mathers, John, 135, 910, 1935
  - Mathews, Jenni, 895, 1635, 1905
  - Matsuo, Eri, 1660
  - Matteini, Amy, 1145
  - Mattek, Nora, 50, 1360, 1415
  - Matthew-Maich, Nancy, 635
  - Matthews, Fiona, 1235
  - Matthews, Judith, 1580, 1620, 2270
  - Matthews, Katey, 1470
  - Mattison, Melissa, 920
  - Matto, Holly, 155
  - Matz-Costa, Christina, 305
  - Mauldin, Kasuen, 205
  - Maurer, Mathew, 1925
  - Maurice, Linda, 210
  - Mauro, Christine, 1020
  - Mauro, Pia, 480
  - Maus, Adam, 410
  - Maus, Marlon, 1070
  - Mavros, Yorgi, 1425
  - Mawn, Barbara, 1325
  - Maxwell, Hillary, 975, 1525
  - Maya, Yoshio, 275
  - Mayans, Kate, 1140
  - Maye, Jacqueline, 1000
  - Mayeux, Richard, 1145
  - Mazzola, Paolo, 1025, 1150
  - Mazzone, Andrea, 1025, 1150
  - Mbiza, Sarah, 1675
  - McAdams DeMarco, Mara, 925, 1035
  - McAllister, Megan, 265
  - McArdle, John, 1290
  - McAtee, Robin, 2075
  - McAvay, Gail, 385
  - McBride, Melen, 980
  - McCabe, Karen, 980
  - McCall, Giavanna, 1630
  - McCallion, Philip, 1955
  - McCammon, Ryan, 2170
  - McCarter, Roger, 1695
  - McCarthy, Catherine, 2180
  - McCarthy, Geraldine, 1640
  - McCarthy, Teresa, 260
  - McCartney, Sue, 1150
  - McClain, Darya, 1115
  - McConnell, Eleanor, 905, 1275, 1945, 2045
  - McConnell, Heather, 1675
  - McCord, Laneshia, 260
  - McCorkle, Ruth, 525
  - McCracken, Cherie, 1230
  - McCreedy, Ellen, 1440
  - McCulloch, Charles, 1790
  - McCulloch, Chuck, 1790
  - McCurry, Susan, 155, 210, 2045
  - McDaniel, Dana, 1645
  - McDermott, Jacob, 2040
  - McDermott, Mary, 1135
  - McDonald, Lynn, 655, 1005
  - McDonough, Christine, 1670
  - McDoom, M., 1835
  - McDougall, Graham, 555
  - McElhaney, Janet, 2195
  - McElroy, Jane, 510
  - McEniry, Mary, 2040
  - McFadden, Anna, 980
  - McFadden, Susan, 140, 210
  - McFall, G., 245, 965, 995
  - McGee, Jocelyn, 2215
  - McGilton, Katherine, 1675
  - McGowan, Meghan, 620
  - McGrew, Kathryn, 275
  - McGue, Matt, 1065, 2220
  - McIlwain, Amber, 280
  - McIntosh, Barbara, 1645
  - McIntosh, Wendy, 1215
  - McKay, Heather, 265
  - McKay, Hunter, 1810
  - McKenzie, Catriona, 585
  - McLaughlin, Deirdre, 980, 2145
  - McLennan, Marianne, 530
  - McLoughlin, Christopher, 750
  - McMeekin, Peter, 1105
  - McMillan, Corey, 1810
  - McMillan, Jacqueline, 485
  - McMullen, Tara, 1185
  - McNees, Patrick, 630
  - McSorley, Veronica, 505
  - McSweeney, Jean, 1255
  - McTavish, Fiona, 410
  - Meador, Rhoda, 1890
  - Meadows, Susan, 510
  - Meda Lara, Rosa, 590
  - Medvene, Louis, 1620
  - Meehan, Patrick, 225
  - Meeker, Mary, 220, 1050
  - Meeks, Suzanne, 225, 245, 625
  - Mee-Lee Nakamoto, Lavonda, 1945
  - Mehdizadeh, Shahla, 1980
  - Mehrotra, Chandra, 1635
  - Mehta, Amar, 630
  - Mehta, Tapan, 1480
  - Meiers, Jan, 1670
  - Meinow, Bettina, 360
  - Mejia, Ivan, 1760
  - Mejia, Shannon, 295, 845, 2260
  - Mekli, Krisztina, 2135
  - Melekis, Kelly, 2110
  - Melendez, Luis, 1995
  - Melendez, Robert, 2170
  - Melentijevic, Ilija, 585
  - Melis, Rene, 665
  - Melkus, Gail, 1505
  - Mello, Anna, 1670
  - Mellone, Sabato, 1665
  - Meltzer, David, 920
  - Melzer, David, 165
  - Menachemi, Nir, 1105
  - Mendes de Leon, Carlos, 70, 235, 1010, 1725
  - Mendes, Andrea, 1650
  - Mendes, Felipe, 640
  - Mendez, Yesenia, 1035
  - Mendez-Luck, Carolyn, 220, 600, 1125
  - Mendoza, Angela, 1325
  - Mendoza Ruvalcaba, Neyda, 590, 990, 1625, 1635, 1645
  - Menec, Verena, 1040
  - Mener, David, 1785
  - Meneses, Karen, 630, 1630
  - Meng, Haijiao, 1275
  - Meng, Hongdao, 1680
  - Meng, Lu, 585
  - Mengel-From, Jonas, 475
  - Mengoni, Marta, 1670
  - Menio, Diane, 955, 955
  - Menkin, Josephine, 1875

- Menne, Heather, 1690, 2080, 2305
- Mentes, Janet, 260, 645, 650, 1015
  - Meoni, Lucy, 1020
  - Merchant, William, 630
  - Mermier, Christine, 265
  - Mero, Richard, 2170
  - Merz, C., 500
  - Merz, Caroline, 1520
  - Meschia, James, 385
  - Metoyer, Ronald, 295, 2260
  - Metzelthinn, Silke, 145, 1245, 2035
  - Meusel, Liesel-Ann, 630
  - Meuser, Thomas, 1680
  - Meyer, Antje, 1375, 2285
  - Meyer, Gabriele, 1280
  - Meyer, Ilan, 1540
  - Meyer, Saskia, 530
  - Meyer, Thomas, 1935
  - Mezuk, Briana, 25, 335, 755, 1045
  - Mi, Hong, 2165
  - Miao, Yinghui, 2110
  - Michael, Kathleen, 760
  - Michael, Yvonne, 235
  - Michalowski, Victoria, 295
  - Miche, Martina, 465
  - Mick, Daniel, 585
  - Middleton, Jennifer, 1680
  - Midlarsky, Elizabeth, 245, 1050
  - Miedzianowski, Susan, 580
  - Mieskowski, Lisa, 215, 600, 995, 1495
  - Miho, Hamayoshi, 240
  - Milam, Alex, 1630
  - Milan, Nicole, 1385
  - Miles, Sarah, 1230
  - Mileski, Michael, 280
  - Milidonis, Mary, 640
  - Milisen, Koen, 1280
  - Miller, Andrew, 590
  - Miller, Dana, 1850
  - Miller, Douglas, 845
  - Miller, Edward, 245, 665, 790, 1095, 1295
  - Miller, Karen-Lee, 1045
  - Miller, L. Stephen, 1625
  - Miller, Leslie, 2200
  - Miller, Lyndsey, 55, 220
  - Miller, Maggi, 210, 1765
  - Miller, Michael, 1030, 1135
  - Miller, Patricia, 80
  - Miller, Richard, 585, 1475
  - Miller, Robert, 1050
  - Miller, Ryan, 355
  - Miller, Steven, 1415
  - Miller, Susan, 275, 790
  - Milliner, Carly, 610
  - Milman, Sofiya, 475
  - Milot, Emmanuel, 2185
  - Miloyan, Beyon, 1020
  - Min, JooHong, 1720, 1870
  - Min, Lillian, 1805
  - Min, Yaena, 1410
  - Mineo, Concetta, 1630
  - Mingo, Chivon, 610, 750, 1000, 1655
  - Minichiello, Victor, 1180
  - Minneci, Cristina, 1670
  - Minor, Lisa, 790
  - Miranda, M., 1125
  - Mirandola, Andrea, 245
  - Mirelman, Anat, 540, 1290
  - Mirsa, Sumi, 1045
  - Mirza, Raza, 655
  - Mishra, Gita, 535
  - Mitchell, Alison, 1680
  - Mitchell, Anne, 235
  - Mitchell, Michael, 1675, 1910
  - Mitchell, Paul, 1235
  - Mitchell, Susan, 2110
  - Mitnitski, Arnold, 585, 965
  - Mitschelen, Matthew, 1615
  - Mittelman, Mary, 845
  - Mitzner, Tracy, 1335, 1620
  - Miyake, Motoko, 270
  - Miyama, Tomoko, 615
  - Miyamae, Fumiko, 625, 985
  - Miyasaki, Nathan, 100
  - Miyawaki, Christina, 660
  - Mlotek, Ruth, 1665
  - Mock, Marilyn, 1270
  - Mock, Steven, 250, 975
  - Moczygamba, Leticia, 1270
  - Moen, Phyllis, 750, 2175
  - Moffatt, Suzanne, 1935
  - Moffitt, Terrie, 965
  - Mogle, Jacqueline, 305, 675, 840, 850, 1030, 1620, 1630, 1640
  - Mohamad, Mashani, 585
  - Mohammad, Abdelrahim, 1015
  - Mohammed, Shajiuiddin, 605
  - Mohanty, Maitreyee, 375
  - Mohler, Jane, 925
  - Mojtabai, Ramin, 1555
  - Mok, Zaneta, 870
  - Mokel, Melissa, 1390
  - Molbo, Drude, 2195
  - Molema, Claudia, 1420
  - Molina, Anthony, 2195
  - Molinari, Victor, 665
  - Mona, Linda, 250
  - Monahan, Deborah, 655
  - Monin, Joan, 2030, 2030
  - Moniz-Pereira, Vera, 965, 1575
  - Monkong, Supreeda, 1025
  - Monroe, Todd, 1045, 2085
  - Montano, Monty, 1145
  - Montepare, Joann, 465, 1630
  - Montero-Odasso, Manuel, 1930
  - Montez, Jennifer, 705, 2140
  - Montgomery, Carolyn, 265
  - Montgomery, Justin, 1025
  - Montoro Rodriguez, Julian, 225, 630, 1765
  - Montpetit, Mignon, 1770
  - Moo, Lauren, 1945
  - Moon, Chooza, 1045
  - Moon, Heehyul, 220
  - Moon, Sojung, 995
  - Moon, Sookyung, 1055
  - Moon, Tae, 410
  - Moon, Yeseon, 70
  - Moone, Rajean, 560
  - Mooney, Christopher, 1620
  - Moore, Alison, 305, 1555
  - Moore, Cindy, 640
  - Moore, Kari, 2225
  - Moore, Melissa, 1385
  - Moore, Mignon, 650, 1055
  - Moore, Stanley, 1845
  - Moorman, Sara, 325, 725
  - Mor, Vincent, 205, 275, 1165, 1185, 1445, 1820, 2105
  - Morais, José, 2185
  - Morales-Sánchez, Adriana, 990
  - Morano, Carmen, 395, 1960
  - Mor Barak, Michàlle, 885
  - Mordecai, Kristen, 370
  - Moreau, Kerrie, 1615
  - Moreira, Mayle, 1665
  - Morel-Kopp, Marie-Christine, 270
  - Morgan, Brianna, 1810
  - Morgan, Debra, 210
  - Morgan, Drake, 1615
  - Morgan, Kory, 1630
  - Morgan, Leslie, 460, 980
  - Morgan, Robert, 1580
  - Morgen, Keith, 280, 1005
  - Mori, Hiroko, 1685
  - Moriello, Gabriele, 1730
  - Morin, Ruth, 245
  - Moris, Melody, 370
  - Morley, John, 320
  - Morley, Melissa, 1165
  - Moroz, Sarah, 620
  - Morris, John, 615, 2275
  - Morrissey, Michael, 1535
  - Morrison, Steven, 355
  - Morrissey, Mary, 1970, 2120
  - Morrow-Howell, Nancy, 615, 655, 660, 1470, 2105
  - Mortensen, Erik, 2195
  - Mortenson, W., 240
  - Mortimore, Edward, 2100
  - Morton, Patricia, 15
  - Moschny, Anna, 1580
  - Mosley, Thomas, 775
  - Mosqueda, Laura, 1025, 1890
  - Moss, Miriam, 1250
  - Moss, Sidney, 1250
  - Mossello, Enrico, 1670
  - Mota, Jorge, 965
  - Motel-Klingebiel, Andreas, 1880
  - Motohashi, Yutaka, 1020
  - Moye, Jennifer, 250, 595, 610, 1625
  - Moyle, Wendy, 1430, 1900
  - Moynihan, Paula, 1935
  - Moyo, Patience, 1295
  - Mroczek, Dan, 120, 795, 1625, 2260
  - Mroczek, Daniel, 1480
  - Mudd, James, 525
  - Mudrazija, Stipica, 2050
  - Mudroch, Steven, 600
  - Mueller, Christine, 905
  - Mueller, Doreen, 225
  - Mui, Ada, 660, 1050, 1640
  - Muir, Susan, 1930
  - Mukai, Katy, 1025
  - Mukamel, Dana, 1820
  - Mulhall, Paula, 1030
  - Mullen, Sean, 1070
  - Muller, Andre, 1910
  - Müller, Nicole, 870
  - Mulligan, Elizabeth, 610, 1625
  - Mulvaney, Elizabeth, 1635
  - Muniz, Graciela, 120, 1480, 1645, 1940
  - Muniz Terrera, Graciela, 120, 135, 1635, 1915, 1940
  - Munly, Kelly, 1535
  - Munoz, Elizabeth, 305, 850
  - Munro, Alexandra, 1935
  - Munson, Peter, 165
  - Murabito, Joanne, 165, 1665
  - Muraco, Anna, 2205
  - Murata, Chiyo, 1000
  - Murata, Hiroyuki, 155
  - Murayama, Hiroshi, 272, 1015, 1050
  - Murayama, Sachiko, 620
  - Murayama, Yoh, 655, 1665
  - Murayama, You, 620
  - Murphy, C., 1465
  - Murphy, Claire, 630
  - Murphy, Declan, 310
  - Murphy, Kathy, 2215
  - Murphy, Lauren, 980
  - Murphy, Mary, 635
  - Murphy, Molly, 610
  - Murphy, Rachel, 1565, 1665
  - Murphy, Terrence, 770
  - Murray, Anne, 925
  - Murtaugh, Christopher, 455, 800, 1655, 1845
  - Murthy, Mahadev, 710
  - Musi, Nicolas, 265
  - Musich, Shirley, 1015
  - Musick, Marc, 855
  - Musil, Carol, 735, 1650, 2055
  - Mutchler, Jan, 605, 1365, 1575
  - Myers, Barbara, 1010
- N**
- Nadash, Pamela, 655, 1330
  - Nadler, Jamie, 1030
  - Naef, Rahel, 645
  - Nagano, Koichiro, 585
  - Nagano, Mayumi, 1660
  - Nagel, Corey, 1910
  - Nagele, Robert, 965
  - Naglie, Gary, 1045, 1525
  - Nagy, Katie, 1645
  - Nah, Su, 660
  - Nahm, Eun-Shim, 760
  - Naik, Aanand, 595, 610, 1625
  - Naito-Chan, Edna, 1350
  - Nakad, Lynn, 970
  - Nakagawa, Takeshi, 290, 990, 1500, 2015
  - Nakagawa, Yasue, 970
  - Nakama, Chikako, 272
  - Nakashima, Taeko, 275
  - Nalepa, Elizabeth, 1625, 1630
  - Nam, Ilsung, 245, 625, 970
  - Nam, You-Seon, 1670
  - Namkung, Eun, 205
  - Napoles, Anna, 245

- Narazaki, Kenji, 270  
 Narici, Marco, 1570  
 Narita, Miki, 1015  
 Naschenweng, Katja, 2250  
 Naslavsky, Michel, 260  
 Nass, Norbert, 585  
 Nativi-Nicolau, Jose, 1130  
 Natsume, Yukie, 1615  
 Nattinger, Matthew, 665  
 Nauck, Bernhard, 820  
 Naughton, Bruce, 635  
 Navarrete Santos, Alexander, 585  
 Nawai, Ampicha, 615, 1675  
 Naylor, Mary, 455, 525, 2045  
 Nazroo, James, 705, 1470, 1490, 1805, 2135  
 Ndukwe, Mberi, 260, 645, 650  
 • Neal, Margaret, 660, 1590  
 Neary, Tara, 230, 620, 990, 1650  
 Nedjat-Haiem, Frances, 1350  
 Needham, Belinda, 1010  
 Neelon, Virginia, 1805  
 Neff, Lisa, 970  
 Negin, Joel, 1180  
 Nehrkorn, Abigail, 615  
 Nelson, Christi, 1625  
 Nelson, Ian, 1980  
 Nemeč, Mary, 460, 1200  
 Nemoto, Miyuki, 260  
 Nerenberg, Lisa, 90  
 Nerino, Anthony, 780  
 Neter, Judith, 1565  
 Neufeld, Stewart, 275  
 Neupert, Shevaun, 1640  
 Nevitt, Michael, 1565  
 • Newcomer, Robert, 2290  
 Newell, Breanne, 1850  
 Newfeld, Kyle, 1455  
 Newhouse, Paul, 1045  
 • Newman, Anne, 170, 355, 965, 1030, 1135, 1145, 1360, 1425, 1565, 1660, 1785  
 Newman, David, 1155, 1285, 1810  
 • Newsom, Jason, 615  
 Newton, Nicky, 700, 795, 1355  
 Newton, Rob, 1425  
 Ng, Carmen, 685  
 Ngo, Bich-Thy, 2075  
 Ngo, Long, 2195  
 Ngo, Nhi, 1100  
 Ngoc, Nguyen, 600  
 Nguyen, Annie, 1025, 1255  
 Nguyen, Duy, 1055  
 Nguyen, Ha, 600  
 Nguyen, Mai, 1645  
 Nguyen, Quynh, 875  
 Nguyen, Tu, 270  
 Ni, Pengsheng, 1560, 1670, 2070  
 Nicholson, Roscoe, 980  
 Nicklas, Barbara, 1015, 2195  
 Nicklett, Emily, 1450  
 Niebling, Wilhelm, 1050  
 Nieborowska, Victoria, 1785  
 • Niederehe, George, 695  
 Nielsen, Brent, 965  
 Nielsen, Lisbeth, 1490  
 Nieman, Carrie, 570  
 Niemeyer, Maryann, 1430  
 Nieuwhof, Freek, 1290  
 Niikawa, Hirotooshi, 272, 625, 985  
 Nikitin, Jana, 1100  
 Nikolich-Zugich, Dragana, 75  
 Nikolich-Zugich, Janko, 75, 1990  
 Nikolov, Jivko, 2285  
 Ni Leime, Aine, 470, 1735  
 Niles-Yokum, Kelly, 1050  
 Nilsen, Kari, 1620  
 Ninomiya, Tomoyasu, 620  
 Nishi, Mariko, 272, 655, 1015  
 Nishimura, Jun, 275  
 Nitz, Lawrence, 1465  
 Nnodim, Joseph, 925  
 Nochajski, Thomas, 1690  
 Noel, Yasmin, 1390  
 • Noelker, Linda, 95, 440  
 Nofuji, Yu, 272  
 Nogales-González, Celia, 1755, 1770  
 Noh, Hyunjin, 1265  
 Nokes, Kathleen, 835  
 Nolet, Kimberly, 940  
 Nonaka, Kumiko, 655  
 Nonaka, Kyoko, 1020  
 Nooyens, Astrid, 1290  
 Nordell, Hannah, 615  
 Norina Weatherman, Margarita, 640  
 Norman, Kristina, 1375, 2285  
 Norstrand, Julie, 130, 580, 1605, 2165  
 • Norton, Maria, 490, 745  
 Notthoff, Nanna, 465, 1715  
 Novosel, Lorraine, 175  
 Nowakowski, Alyssa, 610  
 Nowaskie, Jordan, 155  
 Nowicki, Scott, 1040  
 Nowossadeck, Sonja, 1880  
 Noyes, Maria, 1680  
 Nsiah-Jefferson, Laurie, 1820  
 Nunes, Daniella, 260  
 Nussbaum, Lisa, 230, 620  
 Nuttman-Shwartz, Orit, 495  
 Nyqvist, Fredrica, 1605
- O**
- O, Tara, 175  
 Oates, Shannon, 1625  
 Ober, Scott, 1025  
 Öberg, Peter, 55, 250, 620  
 Oberst, Kathleen, 20, 345, 1535  
 O'Brien, Caitlin, 1625  
 O'Brien, Caragh, 1010  
 O'Brien, Catherine, 980  
 O'Brien, Richard, 210  
 O'Brien-Suric, Nora, 395  
 Obuchi, Shuichi, 230, 270, 590, 620  
 Ochylski, Daniel, 960  
 O'Connell, Megan, 210  
 O'Connor, Melissa, 215, 455, 610, 1655  
 O'Connor, Timothy, 220  
 Odden, Michelle, 170, 845  
 O'Donnell, Alexandra, 615  
 O'Dwyer, Siobhan, 1900  
 Ofei-Dodoo, Samuel, 1620  
 Ofstedal, Mary, 2100  
 Ogami, Shinichi, 275  
 Ogawa, Madoka, 290, 615  
 Ogbonna, Kelechi, 1270  
 Ogletree, Aaron, 630  
 Oh, Hyunsung, 1900  
 Oh, Youngsam, 985  
 Oh, YoungSam, 1050  
 O'Hara, Ruth, 1370  
 Ohayon, Maurice, 2130  
 Ohba, Hiromi, 655  
 Ohlsson, Claes, 2285  
 Ohnishi, Akihiro, 625  
 Oishi, Jorge, 1530  
 Ojala, Hanna, 1625, 1645  
 Okamura, Tsuyoshi, 625  
 Okhravi, Hamid, 210, 1030  
 Oksuzyan, Anna, 1065  
 Okubo, Yoshiro, 260  
 • Okun, Morris, 1510  
 Okura, Tomohiro, 265, 615, 650, 1660  
 Olayiwola, Ibiyemi, 1660  
 Olde Rikkert, Marcel, 665  
 O'Leary, Megan, 655  
 Oliver, JoAnn, 215, 995, 1495  
 O'Loughlin, Karen, 640  
 O'Loughlin, Kate, 2145  
 Olsen, Douglas, 1040  
 Olsen, Maren, 995  
 Olson, Jacilyn, 1635  
 Olson-Kellogg, Becky, 260  
 Oltmanns, Jan, 500  
 O'Malley, A., 940, 940  
 O'Malley, Kelly, 630, 630  
 Ondrich, Jan, 2275  
 O'Neill, Erin, 280  
 O'Neill, Greg, 1090, 1305, 1825  
 O'Neill, Kelly, 1440  
 Ong, Anthony, 1225, 2255  
 Ong, Ken, 650  
 Ono, Mitsu, 1690  
 Ooishi, Tomoko, 1025  
 Orbuch, Terri, 700  
 O'Reilly, Maria, 1430  
 Orel, Nancy, 510  
 Ormond, Catherine, 1435  
 OrNSTein, Katherine, 1140, 2000  
 Orock, Albert, 1615  
 Orona, Gabe, 1630  
 O'Rourke, Norm, 1260  
 Orsulic-Jeras, Silvia, 865  
 Ortiz, Hector, 505  
 • Orwig, Denise, 1425  
 Orwoll, Lucinda, 2250  
 • Ory, Marcia, 205, 220, 760, 990, 1655, 1845, 2230  
 Osada, Hisao, 600, 970  
 Osburn, David, 225  
 Oscar, Nels, 295  
 Oshida, Yoshiharu, 1615  
 Osmani, Tasnia, 225  
 Oster, Peter, 1035  
 Osterhage, Katie, 345, 505  
 • Osterweil, Dan, 960  
 Osuka, Yosuke, 260  
 O'Sullivan, Ann, 235  
 O'Sullivan, Julie, 280, 350  
 O'Sullivan, Roger, 1680  
 • Oswald, Frank, 730, 1605, 1750, 2005, 2300  
 Otake, Hiroshi, 155  
 Otani, Kimie, 1020  
 • Ottenbacher, Kenneth, 650, 1665  
 • Ouslander, Joseph, 1285  
 Owens, Myra, 895, 1635, 1905  
 Owens, Steven, 60  
 Ownby, Raymond, 210  
 Oxley, Jennifer, 660
- P**
- Pachana, Nancy, 1020, 2145  
 Packard, Kathryn, 1255  
 Packard, Kathy, 2075  
 Padala, Kalpana, 370  
 Padala, Prasad, 370  
 Paddon-Jones, Douglas, 1570  
 Padwal, Raj, 1025  
 Paggi, Michelle, 605  
 Pahor, Marco, 965, 1030, 1135  
 Paillard-Borg, Stephanie, 1025  
 Pais, Shobha, 1385  
 Pajewski, Nicholas, 1480  
 Palgi, Yuval, 860  
 Palma Lazgare, Luis, 1045  
 Palmer, Allyson, 100  
 Palmer, Anne, 280  
 Palmer, Jennifer, 2045  
 • Palmer, Mary, 1035  
 Palombo, Ruth, 1645  
 Pan, Xi, 600  
 Pan, Xiaofu, 1050, 1720  
 Pandya, Naushira, 2270  
 Paquay, Louis, 1280  
 Pardasani, Manoj, 1030  
 Parikh, Nina, 415  
 Parimi, Neeta, 355  
 Paris, Barbara, 2280  
 Parisi, Jeanine, 505, 1625, 1650, 2130  
 Park, Bu-Kyung, 760  
 Park, Byung, 75  
 Park, Crystal, 1095, 1645  
 Park, Hye-Kyung, 1020  
 Park, Juyoung, 1675  
 Park, Keong-Suk, 900  
 Park, Ki, 995  
 Park, Linda, 505, 590  
 Park, Min-Kyung, 1500  
 Park, Minsun, 1930  
 • Park, Nan, 215, 2265  
 Park, Sang, 585, 1670  
 Park, Sojung, 235, 580, 625, 1075, 1690  
 Park, So-Youn, 980  
 Park, Soyoung, 980  
 Parke, Belinda, 530  
 Parker, Andrew, 1625  
 • Parker, Marti, 360, 1065  
 Parker, Mary, 1685



- Parker, Samantha, 800  
Parker Callahan, Valerie, 2190  
Parker Oliver, Debra, 510, 1515  
Park-Lee, Eunice, 60, 2115  
• Parmelee, Patricia, 105, 215, 610, 755, 970  
Parmenter, Belinda, 1425  
Parrott, James, 640  
Parsons, Matthew, 1245  
Parsons, Pamela, 895, 1270, 1635  
Pasha, Maha, 2105  
Pasquet, Agnes, 965  
Passos, Yasmin, 1530  
Pasvogel, Alice, 1125, 1455  
Pate, Melannie, 615  
Patel, Birju, 1755  
Patel, Dhara, 110  
• Patel, Kushang, 535, 2130  
Patel, Mamta, 185  
Patidar, Nitish, 2095  
• Patrick, Julie, 240, 615, 620, 1095, 1625  
Patterson, Shannon, 625  
Paudel, Misti, 1665, 1790, 2060  
Paul, Constanca, 2015  
Paul, Constança, 260, 1665, 2015  
Paulson, Sally, 1425, 1660  
Paun, Olimpia, 645  
Pawelec, Graham, 75, 1375  
Payette, Helene, 2185  
Payette, Héléne, 2185  
Payne, Scott, 55  
Peace, Sheila, 1750  
Peak, Terry, 1050  
Pearce, Annina, 665  
Pearce, Daniel, 1645  
Pearson, Kevin, 1615  
Pecanac, Kristen, 1025  
Pechanek, Kaitlyn, 1630  
Peck, Christine, 610  
• Pedersen, Nancy, 210, 1920, 2220  
Pedersen, Sarah, 2295  
Pederson, Jane, 1440  
Pederson, Sarah, 925  
Pedone, Claudio, 1430  
Peelle, Jonathan, 775  
Peoples, Amanda, 460, 1200  
Peeters, Geeske, 535, 925  
Pei, Yaolin, 2050  
Pelak, Victoria, 1615  
Pelts, Michael, 635  
Pendergrass, Anna, 320, 1670  
Pendleton, Neil, 1470, 1805, 2135  
Peng, Siyun, 115  
Peng, Timothy, 1655, 1845  
• Penrod, Janice, 2200  
Peplinski, Kyle, 1055  
Pepperell, Dominic, 270  
Peralta, Carmen, 170  
Percac-Lima, Sanja, 1560  
Perdomo, Dolores, 1755  
Perego, Sabrina, 1025  
Pereira, Jackson, 980  
Pereira, Javier, 1740  
Pereira, Vanessa, 265  
Perera, Subashan, 1665  
Perez, Adriana, 1605  
Perez, Rosa, 460  
Perez-Zepeda, Mario, 270  
Perkins, Bethany, 510  
Perkins, Elizabeth, 1365  
Perkins, Molly, 1140  
Perls, Thomas, 230, 360, 475, 620, 990, 1145, 1650  
Perry, Cynthia, 965  
Perry, Tam, 1680, 1955  
Person, Sharina, 230  
Person Mecca, Laurel, 1620  
Perweiler, Elyse, 665, 1030  
Peters, Emily, 1730  
Peters, Marjolein, 165  
Petersen, Inge, 2220  
Petersen, Johanna, 50  
• Peterson, Charlotte, 1990  
Peterson, Emmalyne, 615  
Peterson, Lindsay, 275, 1680  
Peterson, Roberta, 1645  
Peterson, Tina, 600  
Pethtel, Olivia, 620  
Petkus, Andrew, 500, 1920  
Petroski, Gregory, 1690  
Petrovic, Snezana, 1015  
Petrovic-Poljak, Ana, 2180  
Petrovsky, Darina, 555  
Pettus, Joelle, 220  
Pfeiffer, Klaus, 320, 1670  
Pfeiffer, Tina, 2300  
Pham, Tuan, 2260  
Phelan, Elizabeth, 60, 345, 505  
Philippart, Carissa, 1230  
Phillips, Allison, 745  
Phillips, Amanda, 215  
Phillips, Drystan, 2135  
• Phillips, Judith, 10  
Phillips, Karon, 1355, 2295  
Phillips, Kristin, 1995  
Phillips, Leo, 585  
• Phillips, Linda, 260, 645, 650, 1005, 1250  
Phillips, Lorraine, 1575, 1660  
Phillips, Patrick, 1475  
• Phillipson, Christopher, 1220, 1340, 1735  
Phinney, Alison, 2125  
Phongphanngam, Sutthida, 1665  
Piazza, Jennifer, 1630, 1770  
Piccinin, Andrea, 120, 1480, 1760, 1915, 1940  
Piccolo, Rebecca, 1550  
Pichora-Fuller, Margaret, 1785  
• Pickard, Joseph, 1680  
Pickard, Susan, 200  
Pickering, Andrew, 585  
Piemonte, Maria, 640, 1665  
Pieper, Carl, 630  
Pierce, Steven, 1505  
Pierce, Thomas, 1730  
Pierpaoli, Christina, 1745  
Piersol, Catherine, 1690  
Pietila, Ilkka, 1625, 1645  
Pietrzak, Robert, 995  
Pifer, Marissa, 1625  
Piggee, Tommy, 965  
Pike, Kenneth, 155, 1515  
• Pillemer, Karl, 35, 115, 330, 590, 1225, 1485, 1650, 1890  
Pilling, Kelsey, 210  
Pilling, Luke, 165  
Pilver, Corey, 995  
Pintak, Indira, 1050  
Pion, Charlotte, 265  
Piper, David, 350  
Piper, Rosalinda, 570  
Pisani, Margaret, 770  
Pitkälä, Kaisu, 640, 1625, 1675  
Pitt-Catsoupes, Marcie, 305  
Pittella, Francesca, 1150  
Plaks, Jason, 1875  
Plant, Amy, 595  
Pla-Raith, Sylvia, 1395  
Plassman, Brenda, 1015, 1275  
Platen, Petra, 1580  
Plathe, Paula, 1470  
Platonova, Elena, 1630, 1675  
Platt, Kristen, 1615  
Pletcher, Hayley, 1050, 1265  
Pliakos, Christos, 2175  
Plichta, Stacey, 1155  
Plikuhn, Mari, 240  
Plischke, Herbert, 1620  
Ploeg, Jenny, 635, 1675  
Plotzke, Michael, 95, 2125  
Plys, Evan, 225  
Podgorski, Carol, 1215  
Podnieks, Elizabeth, 1970  
Poey, Judith, 60  
Pogorzelska-Maziarz, Monika, 1430  
Pohl, Janet, 1045  
Polenick, Courtney, 1260, 2175  
• Polivka, Larry, 575, 1320, 1600  
Polnaszek, Brock, 525  
Pompeu, José, 265, 640, 1665  
Pompeu, Sandra, 265, 1665  
Ponzio, Allison, 230  
Poole, Janet, 915, 1800  
• Poon, Leonard, 150, 290, 615, 825, 970, 1500, 1625, 1645, 2015  
Pope, Natalie, 1530, 1690  
Popejoy, Lori, 1430, 1690  
Popescu, Mihal, 635, 1415  
Popham, Lauren, 1630  
Porell, Frank, 245, 655, 665, 980, 1095, 1295, 1645  
Porock, Davina, 420, 1045  
Portacolone, Elena, 40  
Portanova, Jaclyn, 240  
Portegijs, Erja, 645  
Porter, Candace, 210, 1765  
Porter, Jacquelyn, 525, 1030, 1950  
Porter, Kristen, 560, 835  
Porter, Martha, 1980  
Porter, Matthew, 1180  
Pot, Anne, 420, 485, 530  
Potochnik, Alison, 1645  
Potter, Andrew, 665  
Potter, D., 2100  
Potter, Emma, 1390  
Pounds, Dana, 245  
Powell, Laura, 100  
Powers, John, 1810  
Powers, Melissa, 1425, 1635  
Powers, Sara, 250, 600  
Pozniak, Alyssa, 2125  
Prada, Diddier, 1550  
Pradhan, Rohit, 2095  
Pratt, Donald, 780  
Pratt, Laura, 995  
Pratt, Mary, 2100  
Premnath, Rashmi, 410  
Prescott, Carol, 1290, 2135  
Pretzer-Aboff, Ingrid, 145, 1245  
Price Wolf, Jennifer, 565  
Price, Debora, 200  
Price, Diane, 1040  
Price, Elizabeth, 610, 1215, 1540  
Price, Rachel, 665, 960  
Prigerson, Holly, 1140, 1640  
Primetica, Branka, 345, 1395, 2180  
Principi, Andrea, 855  
Prizer, Lindsay, 1140  
Proulx, Christine, 1385, 1525  
Proulx, Jeffrey, 1645  
Province, Michael, 1145  
• Pruchno, Rachel, 150, 810, 875, 995  
Pryor, Jennifer, 610  
Psaty, Bruce, 170  
Pu, Lin, 1695  
Pulkki, Jutta, 845  
Pulko, Vesna, 75  
Punpuing, Sureeporn, 1190  
Purcell, Patrick, 1105  
Pursell, Amanda, 272  
Putnam, Michelle, 1365, 1955  
Puurveen, Gloria, 210  
• Pynoos, Jon, 1975
- ## Q
- Qi, Bing-Bing, 980  
Qiu, Qixiang, 640  
Quach, Lien, 260, 970, 1000  
• Qualls, Sara, 225, 630, 1620  
Queen, Tara, 490, 675, 1630  
Quest, Nancy, 1965  
Quest, Tammie, 1140  
Quijano, Louise, 1685  
Quinn, Charlene, 1080  
Quinones, Ana, 595, 1910, 2105  
Quite, Wouter, 330
- ## R
- Raab, Constance, 1590  
Rabbitt, Patrick, 890  
Rabig, Judith, 2045  
• Rabins, Peter, 1265, 2035  
Radwin, Laurel, 1945  
Rafferty, Jane, 755

- Raffield, Laura, 1640  
 Raghavachari, Nalini, 965  
 Rahman, Momatazur, 1165  
 Rahman-Filipiak, Annalise, 1625  
 Raik, Barrie, 635  
 Raina, Ketki, 1800  
 Raitanen, Jani, 845, 1065  
 Rajamohan, Santhiny, 420, 1045  
 Rakugi, Hiromi, 272  
 • Ralston, Penny, 1035  
 Ram, Nilam, 30, 220, 295, 675, 850, 1880, 2025, 2240, 2260  
 Ramalho, Fátima, 965, 1575  
 Raman, Prassanna, 755  
 Ramel, Alfons, 1425  
 Ramey, Angela, 1575  
 Ramirez, Jhon, 1660  
 Ramirez, Mildred, 1890  
 Ramos, Angel, 225  
 Ramos, Katherine, 245  
 Ramsey, Christine, 1625  
 Ramsey, Daniel, 635  
 Ramsey, Jennifer, 1640  
 Ramsey-Klawnsnik, Holly, 185  
 Ran, Shan, 1680  
 Randall, G., 825, 2200  
 Rantakokko, Merja, 645  
 Rantanen, Taina, 645  
 • Rantz, Marilyn, 635, 1415, 1430, 1690  
 Rao, Aditi, 455, 905  
 Rao, Alycia, 280  
 Raphael, Alexandra, 1010  
 Rapo, Christel, 835  
 Rapoport, Mark, 1525  
 • Rapp, Stephen, 215, 1135, 1805  
 Rashad, Ramy, 2270  
 Rasmussen, Kelli, 490  
 Rast, Philippe, 1760, 1940  
 Ratliff, Scott, 1045  
 Ratner, Pamela, 2125  
 Rattinger, Gail, 210, 745  
 Rauer, Amy, 700  
 Rauers, Antje, 1100  
 Rauh, Mitch, 265  
 Rebec, George, 1615  
 • Rebok, George, 230, 505, 610, 1625, 2130  
 Rebola, Claudia, 2270  
 Reczek, Corinne, 115  
 Reddy, Pooja, 325  
 • Redfoot, Donald, 1320  
 Redford, Linda, 665  
 Redline, Susan, 215, 2060  
 Reece, Heather, 275, 345, 575  
 Reed, Andrew, 1485  
 Reed, David, 940  
 Reed, Nia, 880  
 Reeser, Cynthia, 275  
 Reese, Ashante, 1080  
 Reeve, Alya, 1385  
 Reeve, Emily, 1410  
 Reeves, Byron, 2025  
 Regev, Irit, 495  
 Regier, Natalie, 595, 970  
 Reich, John, 15  
 Reid-Keene, Jennifer, 240, 1645  
 Reid, Cary, 415, 800, 1485  
 Reid, Kieran, 585, 1135  
 Reiersen, Marilyn, 1440  
 Reifsnnyder, JoAnne, 905  
 Reinders, Ilse, 1565, 1665  
 Reinhard, Susan, 1585, 2115  
 • Reinhardt, Joann, 315, 975, 1970  
 Reistetter, Timothy, 650  
 Reitz, Anne, 795  
 Reitz, O., 905  
 Rejeski, W., 1135  
 Remle, R., 240  
 Ren, Zhengwei, 2165  
 Rengifo Nevarez, Johanna, 1210  
 Rentsch, Julie, 345  
 Renzhofer, Holly, 1510  
 • Resnick, Barbara, 145, 240, 305, 530, 760, 765, 1245, 1915, 1980  
 Resnick, Susan, 210, 265, 965, 1805  
 Retornaz, Frédérique, 1290  
 Rettiganti, Mallikarjuna, 2270  
 Reuther, Sven, 450  
 Revell, Andrew, 985, 1625  
 Reyes, Adriana, 705, 1865  
 Reyes, Belinda, 990  
 Reyes, Carmen, 650  
 Reyes, Roberto, 925  
 Reyes-Ortiz, Víctor, 280  
 • Reynolds, Chandra, 1920, 2220  
 Reynolds, Charles, 1020, 2130  
 Reynolds, Lindsay, 1990  
 Rezzoug, Nawel, 965  
 Rhee, Min-Kyoung, 885  
 Rhodes, J., 385  
 Rhodes, J.David, 640  
 Rhodes, William, 1845  
 Ribeiro, Luiz, 265  
 Ribeiro, Oscar, 260, 1645, 1665, 2015  
 Ricart, Ender, 600  
 Rice, Kristen, 1045  
 Richards, Emma, 1230  
 Richards, Fayana, 235  
 Richards, Kathy, 260  
 Richards, Marcus, 120  
 Richardson, Caroline, 270  
 Richardson, Lorilei, 985  
 Richardson, Margaret, 605  
 Richardson, Russell, 1130  
 Richardson, Teresa, 1635, 1905  
 Richardson, Todd, 1680  
 Richardson, Virginia, 935  
 Richeson, Nancy, 1675  
 Ricks, Daniel, 965  
 Rideaux, Tiffany, 1370  
 Riediger, Michaela, 1100, 2255  
 Riffin, Catherine, 115, 1485  
 Rifon, Nora, 2160  
 RightTimePlaceCare Consortium, 1280  
 Riley, Alicia, 725  
 Riley, Joseph, 965  
 Riley, Thomas, 50  
 Rillamas-Sun, Eileen, 1405  
 Ring, Lauren, 1300  
 Rissanen, Pekka, 845  
 Ritchie, Christine, 1455, 1630, 2000  
 Ritchie, Lea, 335  
 Rivas, Edgar, 1590  
 Rivera-Hernandez, Maricruz, 2105  
 Rivers, Crystal, 15  
 • Rix, Sara, 430  
 Rizk, Anthony, 665  
 Ro, Annie, 1865  
 Roach, Pamela, 1055  
 Roan, Carol, 1380  
 Robbins, Joanne, 1150  
 Robbins-Ruszkowski, Jessica, 1830  
 Robert, Schoeni, 1010  
 • Roberto, Karen, 185, 210, 1055, 1115, 1260, 1390, 1535, 1685, 1705  
 Roberto, Pamela, 665, 1050  
 Roberts, Amy, 605, 1655  
 Roberts, Angela, 780  
 Roberts, Ellen, 2230  
 Roberts, Laken, 2000, 2130  
 Roberts, Tonya, 940, 970, 1185, 1950  
 Robertson, Suzanne, 220  
 Robine, Jean-Marie, 360, 1065  
 Robinson, Carrie, 1455  
 Robinson, Cyndy, 915, 1800  
 Robinson, Erin, 240  
 Robinson, Joanne, 1840  
 Robinson, Kristen, 2100  
 Robinson, Louise, 135, 272, 1235  
 Robinson, Stephanie, 1640  
 Robison, Betty, 1635  
 Robison, Julie, 1690, 1980  
 Robitaille, Annie, 120, 1940  
 Robles, Theodore, 1875  
 Robles-Jimenez, Leslie, 270, 665  
 Rochon, Elizabeth, 1675  
 Röcke, Christina, 970  
 Rockwood, Kenneth, 585, 920, 965  
 Rodakowski, Juleen, 1800  
 Rodgers, Joseph, 1940  
 Rodriguez, Daniel, 2225  
 Rodriguez, Stephanie, 1625  
 Rodriguez-Laso, Angel, 615  
 Roes, Martina, 450  
 Rogers, Carol, 1575  
 Rogers, Charles, 1355  
 Rogers, Geoffrey, 415, 1155  
 • Rogers, Joan, 1800  
 Rogers, Steven, 585  
 Rogers, Wendy, 1335, 1620  
 Rogus-Pulia, Nicole, 1150  
 Roh, Soonhee, 590, 1630, 1970  
 Rohde, Charles, 160  
 Roherty, Martha, 1595  
 Rohr, Margund, 795, 1625  
 Roiland, Rachel, 525, 1185, 1950  
 Rojido, Maria, 1285  
 Rokusek, Cecilia, 1685  
 Roland, Kaitlyn, 1915  
 Rolfson, Darryl, 1025  
 Roll, Anne, 260  
 Roller, Christine, 1030  
 Rome, Vincent, 60, 2115  
 Romero-Moreno, Rosa, 1755, 1770  
 Romøren, Tor, 545  
 Ronnberg, Jerker, 775  
 Ronneberg, Corina, 245, 560, 1095  
 Rosano, Caterina, 170, 515, 965, 1360, 1660  
 Rosario, Bedda, 1660  
 Rosas, Vianca, 1755  
 • Rose, Karen, 765  
 Rose, Miriam, 95  
 Rose, Roger, 855  
 Rosemberg, Laura, 1015  
 Rosemond, Cherie, 2230  
 Rosen, Howard, 1325  
 Rosendahl, Dan, 330  
 Rosendahl, Sirpa, 330  
 • Rosenfeld, Alan, 575  
 Rosenoff, Emily, 1435  
 Rosenthal, Marsha, 980  
 Ross, Joseph, 2000  
 Ross, Susan, 205  
 Ross, Tiana, 235  
 Rossi, Francesca, 1430  
 Rossi, Michelle, 365  
 Rosso, Andrea, 170, 1660  
 Rostant, Ola, 2170  
 Rote, Sunshine, 600, 1195  
 Roth, David, 220, 335, 640, 2130, 2175, 2245  
 Roth, Erin, 1080, 1200  
 Roth, Thomas, 715  
 Rothermund, Klaus, 1875  
 Rothschild, Steven, 590  
 Rott, Christoph, 2015  
 Rottenberg, Yakir, 1670  
 Rottman-Sagebiel, Rebecca, 370  
 Roush, Robert, 1640  
 Rovine, Michael, 1510, 1650, 1910  
 Rovner, Barry, 315  
 Rowe, Jody, 1215  
 • Rowe, Meredith, 1670  
 • Rowles, Graham, 730, 1750  
 Roy, Cindy, 585  
 • Rozario, Philip, 655  
 Rozin, Tanya, 2250  
 Ruan, Jenny, 245, 755, 985, 1855  
 Rubbieri, Gaia, 1670  
 Ruben, Kathy, 1315  
 • Rubenstein, Laurence, 1045, 2075  
 • Rubinstein, Robert, 460, 1080  
 Rudner, Mary, 775  
 Ruggiano, Nicole, 1690, 1955  
 Ruggles, Hannah, 1590  
 Ruhl, Mary, 1325  
 Ruiz, Milagro, 415  
 Runge, Shannon, 245  
 Ruppap, Todd, 1575, 1660  
 Rupper, Randall, 225, 280, 595, 1495, 1995  
 Rupprecht, Roland, 210  
 Rurka, Marissa, 35  
 Rusche, Nicole, 1150  
 Rush, Jonathan, 1760  
 Rushing, Julia, 1015

- Rusli, Kezia, 2270  
 Russek, Jacquelyn, 2055  
 Russell, Alissa, 1770  
 Russell, David, 2000  
 Russell, Sarah, 1355  
 Rust, Tiana, 1685  
 Rut, Jordan, 1525  
 Rutenberg, Andrew, 585  
 Rutkow, Lainie, 1555  
 Rutsohn, Joshua, 1625  
 Ruttner, Laura, 2115  
 Ruwaard, Dirk, 210  
 Ryan, Alice, 1425  
 Ryan, Caroline, 2190  
 Ryan, John, 1130  
 Ryan, Lindsay, 295, 675, 680, 700, 1490, 1630  
 Ryman, Denny, 480  
 Rytter, Brenda, 940  
 Ryvicker, Miriam, 2165
- S**
- Sabanovic, Selma, 1530  
 • Sabat, Steven, 870, 1520, 1815  
 Sabbath, Erika, 1010, 1760  
 Sabia, Séverine, 1255  
 Sabik, Natalie, 880  
 Sabir, Myra, 590  
 Sacco, Paul, 305, 1050, 1555  
 Sachdev, Perminder, 1290  
 Saczynski, Jane, 210, 230  
 Saenz, Joseph, 1865  
 Saenz, Rogelio, 1865  
 Safdar, Nasia, 1150  
 Safford, Monika, 385  
 Saghazadeh, Mahshid, 265, 650  
 Sahakyan, Karine, 650  
 Saigal, Nidhi, 1290  
 Saito, Yasuhiko, 360, 970, 1870  
 Saito-Kokusho, Tami, 495, 600, 1000  
 Sakamoto, Shizuo, 265, 265  
 Sakuma, Naoko, 272, 625, 985, 1665  
 Sakurai, Ryota, 1665  
 Salari, Sonia, 495  
 Salas, Rachel, 300  
 Saldana, Nelson, 2225  
 Salewsky, Bastian, 2285  
 Saliba, Debra, 1185, 2100  
 Salinas, Jennifer, 1125  
 Salmon, Jennifer, 1055  
 Salter, Megan, 925  
 Salzburger, Veronika, 820  
 Samanta, Tannistha, 1870  
 Samatas, Catherine, 245  
 Samenow, Charles, 65  
 Samuel, Laura, 335, 1055, 2130  
 Samus, Quincy, 625, 2035  
 Sanchez, Daisey, 570  
 Sanchez, Hugo, 272, 970, 1015, 1030  
 Sanchez-Garcia, Sergio, 270  
 Sánchez Jiménez, Alveiro, 1660  
 Sanders, Alisha, 2210  
 Sanders, Chelsea, 1810  
 Sanders, Jason, 170  
 Sanders, Natalie, 230  
 • Sanders, Sara, 240  
 Sandman, Per-Olof, 420  
 • Sands, Laura, 500  
 Sanford, Jon, 1070, 1530, 1620, 1685  
 Santoni, Giola, 2275  
 Santos, Tricia, 990  
 Santos-Rocha, Rita, 965  
 Santoyo-Olsson, Jasmine, 245  
 Sapkota, Shraddha, 625  
 Sardina, Angie, 1675  
 Sardinha, Luís, 965  
 Sargent, Lana, 1270, 1635  
 Sargent-Cox, Kerry, 30  
 Sarkar, Abhirup, 965  
 Sarkisian, Catherine, 650, 1055  
 Satariano, William, 1070, 2300  
 Sato, Ayane, 265, 1660  
 Sato, Shinichi, 240  
 Satterfield, Suzanne, 775, 1030, 1785  
 Sauer, Philip, 2105  
 Saunders, Pamela, 125, 870  
 Saunders, William, 1630, 1675  
 Savage, Lynette, 600  
 Savas, Sue, 1840  
 Saville, Alyson, 630  
 Savino, Dorian, 1665  
 Saviolis, Steven, 2280  
 • Savla, Jyoti, 1625  
 Saenz, Rogelio, 1865  
 Savundranayagam, Marie, 235, 1690  
 Sawada, Yuki, 1690  
 Sawaoka, Shino, 275  
 Sawaya, Bassel, 272  
 Sawyer, Patricia, 340, 1295  
 Sayegh, Philip, 2265  
 Scales, Kezia, 420  
 Scarpate, Diane, 1995  
 • Scarpate, Philip, 1615  
 Schade, Hannah, 2030, 2240  
 Schaefer, Sydney, 1510  
 Schafer, Markus, 1395  
 Schäfer-Walkmann, Susanne, 530  
 • Schaie, K., 30, 1555  
 Schalet, Benjamin, 120, 2260  
 Schapmire, Tara, 1020  
 Scharf, Thomas, 730, 1220, 1685  
 • Scharlach, Andrew, 130, 565, 1450, 1840, 1975  
 Scheepmans, Kristien, 1280  
 Scheibe, Susanne, 1630  
 Scheideman-Miller, Cynthia, 2075  
 • Scheidt, Rick, 2315  
 Scheier, Michael, 15  
 Scheirer, Mary, 2230  
 Scherer, Martin, 1050  
 Scherer, Michael, 480  
 Scherer, Yvonne, 220, 265  
 Schick Markaroff, Kara, 1660  
 Schiffer, Linda, 1255  
 Schilling, Oliver, 315, 605, 1385  
 Schindler, Manuel, 210  
 • Schinka, John, 1540  
 Schirmer, Claudine, 910  
 Schlaak, Mary, 95  
 Schlairet, Maura, 270  
 Schmidt, Dagmar, 272  
 Schmidt, Jessica, 1660  
 Schmidt, Laura, 1620  
 Schmidt, Nicholas, 1680  
 Schmidt, Steven, 1605  
 Schneider, Ellen, 2230  
 Schneider, Nils, 1035  
 Schoch, Judith, 1620  
 • Schoenberg, Nancy, 375, 970, 1555  
 Schold Davis, Elin, 975  
 Schöllgen, Ina, 675  
 Schols, Jos, 1205  
 Schonfeld, Daniel, 2265  
 Schousboe, John, 1790, 2060  
 Schrack, Jennifer, 1775, 1780, 1925  
 Schrader, Amy, 585  
 • Schrauf, Robert, 125, 870  
 Schretlen, David, 1480  
 Schroeder, Shelby, 665  
 Schryer, Emily, 250, 975  
 Schubel, Stacey, 1635  
 Schueller, Monica, 20, 1885  
 Schulman-Green, Dena, 385  
 • Schulz, Richard, 1250, 1360, 1515, 1580, 1635, 1755, 1970, 2030, 2270  
 • Schumacher, John, 2250  
 Schupf, Nicole, 1145  
 Schuster, Elizabeth, 1760  
 Schutte, Debra, 2080  
 Schütz, Benjamin, 1860  
 Schwanke, Carla, 1015  
 Schwarga, Alexander, 1525  
 Schwartz, Abby, 655, 1455  
 Schwartz, Brian, 335  
 Schwartz, Joel, 630  
 • Schwartz, Robert, 975, 1525  
 Schwartz, Sarah, 210, 865, 1810  
 Schwartzman, Michal, 585  
 Schweinle, William, 1530  
 Schwendimann, René, 545  
 Sciegaj, Mark, 665, 1960, 2115  
 • Scogin, Forrest, 600, 625, 980  
 Scott, Cathy, 1710  
 Scott, Stacey, 305, 850, 1630, 1770  
 Scruggs, Makara, 2010  
 Seals, Douglas, 1615  
 Seaman, Jennifer, 1295  
 Seaman, Kendra, 610, 625, 1625  
 Sebastiani, Paola, 230, 620, 1145, 1650  
 Sebern, Margaret, 2180  
 Sebern, Mark, 2180  
 Seckin, Gul, 990, 1620  
 Sedall, Stephanie, 1630  
 Seeley, Janet, 1180  
 Seelye, Adri, 50  
 • Seeman, Teresa, 1875, 2140  
 Sefcik, Justine, 555, 1030  
 • Segal, Daniel, 245, 590, 625  
 Segal-Gidan, Freddi, 990  
 Segerstrom, Suzanne, 2255  
 Segev, Dorry, 925  
 Seidel, Liz, 1180  
 Seidl, Ulrich, 230  
 Seino, Satoshi, 270  
 Selder, Christina, 1465  
 Sellars, Besangie, 1355  
 Sellon, Alicia, 1330  
 Seltzer, Judith, 820  
 Semerjian, Tamar, 205  
 Sen, Bisakha, 1105  
 Sengupta, Manisha, 60, 945, 1400, 1435, 2115  
 Senthilselvan, Ambikaipakan, 1025  
 Seok, Jae, 245, 970  
 • Seplaki, Christopher, 845, 2000, 2130, 2275  
 Sequeira Grass, Stephanie, 1625  
 Sereida, Sheryl, 155  
 Sereika, Susan, 1030, 1295  
 Serrano, Patricia, 210  
 • Settersten, Richard, 45, 1085, 2025  
 Sewell, Deborah, 1030  
 Shadmí, Efrat, 525, 920  
 Shah, Amy, 590, 1255  
 Shah, Avani, 970  
 Shah, Dhavan, 410  
 Shah, Shivani, 1655, 1845  
 Shah, Shruti, 245  
 Shake, Matthew, 630  
 Shalev, Idan, 965  
 Shantik, Aparna, 40  
 Shannon, George, 585  
 Shapses, Sue, 1015  
 Shardell, Michelle, 1150  
 Shariff, Gauhar, 2250  
 Sharit, Joseph, 1335, 1820  
 Sharpe, Chantelle, 665  
 Sharrett, A., 775  
 Shatzenstein, Bryna, 2185  
 Shaw, Benjamin, 272, 615, 650, 1050  
 Shaw, Candace, 2075  
 Shaw, Maureen, 1155  
 • Shay, Kenneth, 1495, 1965  
 • Shea, Dennis, 705  
 Shea, Kyla, 1565  
 Shear, M., 1020  
 Shears, Jeffrey, 2110  
 Sheehan, Connor, 2140  
 Sheehan, Orla, 640  
 • Sheets, Debra, 990, 1025, 1660  
 Sheldon, Emma, 665, 1050  
 Shellman, Juliette, 1390  
 Shelton, Alison, 430  
 Shelton, Evan, 625, 2010  
 Shen, Huei-Wern, 225, 1680  
 Shenhart-Tsarfaty, Shani, 272  
 Sheppard, Christine, 1005  
 Sheppard, Lisa, 1420  
 Sheppes, Gal, 1630  
 Sherif, Youmna, 745  
 • Sherman, Carey, 820  
 Shi, Junrong, 1050  
 Shi, Shaoxuan, 1680  
 Shi, Xiaoming, 1110  
 Shick, Sarah, 990

- Shield, Renee, 275  
 Shields, Cleveland, 1625  
 Shih, Regina, 2090  
 Shim, Janet, 1455  
 Shim, Jin, 970  
 Shimmei, Masaya, 1685  
 Shimomura, Sam, 960  
 Shin, Koun, 265  
 Shin, So, 265  
 Shinkai, Shoji, 272, 590, 655, 1015, 1050, 1665  
 Shiokawa, Takashi, 615  
 Shiomitsu, Yoshiko, 1685  
 Shipley, Martin, 1255  
 Shippee, Tetyana, 1585  
 Shirai, Yumi, 1365  
 Shiu, Cheng-Shi, 2205  
 Shlipak, Michael, 1015  
 Shmerling, Robert, 1675  
 Shobo, Yetty, 2175  
 Shoelson, Steven, 265  
 Shoffner, David, 1105  
 Shoji, Kristy, 1630  
 Shon, En-Jung, 215  
 Shorr, Ronald, 1665  
 Short, Jerome, 615  
 Shouse, Jamie, 625  
 Shoval, Noam, 230  
 Shrestha, Srijana, 1370  
 Shreve, Scott, 1965  
 Shrira, Amit, 860  
 Shtompel, Natalia, 1690, 1955  
 Shubert, Tiffany, 2230  
 Shugrue, Noreen, 1980  
 Shui, Cheng-Shi, 2205  
 Shulley, Leah, 630  
 Shumaker, Sally, 215  
 Shura, Robin, 200  
 Shwartz, Michael, 2045  
 Sibai, Abla, 665  
 Sidani, Souraya, 1675  
 Siders, Rebecca, 200  
 Siefert, Julie, 1635  
 Siegel, Elena, 905  
 Siegel, Joy, 990  
 Siegler, Ilene, 1645  
 • Sierra, Felipe, 815, 1060  
 Siervo, Mario, 135, 272, 910  
 Sievänen, Harri, 540  
 Siggeirsdottir, Kristin, 1565  
 Sigurdsson, Sigurdur, 585  
 Sikma, Suzanne, 905, 1045  
 Sikorska-Simmons, Elzbieta, 1050, 1265  
 Sikorskii, Alla, 1885  
 Silber, Rolf-Edgar, 585  
 Sillito, Carrie, 495  
 Silva, Analiza, 965  
 Silva, Antônio, 265, 1020  
 Silva, Nicole, 1625  
 Silva, Vernon, 265, 1020, 1660  
 Silva-Castro, Noelia, 1710  
 Silver, Michelle, 885  
 Silver, Stephanie, 1890  
 Silverberg, Nina, 710, 1810  
 • Silverstein, Merril, 740, 820, 1085, 1225, 2055  
 • Silverstein, Nina, 280, 665, 1645  
 Simanek, Amanda, 75  
 Simm, Andreas, 272, 585  
 Simmons, Heather, 585  
 Simmons, Sandra, 1045  
 Simon, Melissa, 245, 755, 830, 985, 1390, 1625, 1640, 1855  
 Simoni-Wastila, Linda, 1020, 1295, 1920  
 • Simon-Rusinowitz, Lori, 1300, 1315, 1590  
 Simonsick, Eleanor, 355, 775, 880, 1665, 1775, 1780, 1785  
 Simonson, Julia, 225, 680, 1880  
 Simpson, Gaynell, 555  
 Sims, Regina, 215  
 Sims, Tamara, 1485, 1715  
 Sims-Gould, Joanie, 265, 1685  
 Sin, Nancy, 2255  
 Singh, Jatinder, 1145  
 Singh, Nalin, 1290  
 Singh-Manoux, Archana, 965, 1255, 2080  
 Singleton, Meki, 1690  
 Sinha, Richa, 625  
 Sink, Kaycee, 1135  
 Sinkewicz, Marilyn, 2170  
 Sinoff, Gary, 920  
 Sions, J., 520  
 Sions, Megan, 520  
 Siraj, Saedah, 2145  
 Siren, Anu, 1525  
 Sirey, Jo, 625  
 Siverskog, Anna, 560  
 Sixsmith, Andrew, 425  
 Sixsmith, Judith, 425  
 Siza, Maria, 1020  
 Sjogren, Karin, 545  
 Sjostedt, Jennifer, 745  
 Skar, Pal, 1660  
 Skarupski, Kimberly, 1640, 1650  
 • Skemp, Lisa, 765, 1805  
 Skidmore, Elizabeth, 1800, 2130  
 Skjodt, Mathias, 355  
 Skogstad, Anders, 545  
 Skolarus, Lesli, 70  
 Skrajner, Michael, 210, 1915  
 Skrine Jeffers, Kia, 1005  
 Skritskaya, Natalia, 1020  
 Skubic, Marjorie, 635, 1415  
 Slagle, Ashley, 1795  
 Slattum, Patricia, 375, 895, 1270, 1410, 1635  
 Slaus, Björn, 1605  
 Slivka, Judy, 1025  
 Sliwinski, Martin, 305, 850, 1630, 1640, 1660  
 Sloan, Frank, 195  
 Slovak, Karen, 1690  
 Smagula, Stephen, 2060  
 Smaaldone, Arlene, 1045, 1430  
 • Small, Brent, 245, 625  
 Small, Eusebius, 610  
 Smallfield, Stacy, 1530  
 Smetcoren, An-Sofie, 235, 650, 990, 1045, 1205  
 Smilovich, Elizabeth, 210, 1025, 1945  
 Smit, Dieneke, 530  
 Smith, Caitlyn, 280  
 Smith, Carrie, 655  
 Smith, Cristan, 305, 1050  
 Smith, Daniel, 100  
 Smith, Dawn, 1295  
 Smith, Derek, 280  
 Smith, Dylan, 105, 755  
 Smith, Erin, 280, 580  
 • Smith, Gregory, 225, 630, 735, 1765, 2055, 2140  
 • Smith, Jacqui, 235, 295, 590, 605, 680, 700, 985, 1490, 1630, 1880, 2025  
 Smith, Jennifer, 605, 620  
 Smith, John, 1675  
 Smith, Judith, 125, 1705  
 Smith, Katherine, 235  
 Smith, Kelly, 1050  
 • Smith, Ken, 490  
 Smith, Mary, 220  
 Smith, Matthew, 205, 220, 1655, 1845, 2230  
 Smith, Rachel, 375, 1555, 1620  
 Smith, Ronald, 225  
 Smith, Simon, 1425  
 Smith, Susan, 1670  
 Smith, Thomas, 2280  
 Smithey, Megan, 75  
 Smith-Ray, Renae, 500, 1255  
 Smout, Randall, 940  
 Smyth, Amy, 1840  
 Smyth, Joshua, 305, 850, 1630, 1640, 1660  
 Sneed, Rodlescia, 1630  
 Snell-Rood, Claire, 970  
 Snethen, Colter, 1680  
 Snodgrass, J., 605, 985, 1015  
 Snow, A., 990, 1580  
 Sobol, Nanna, 272  
 Sohn, Eui, 1055  
 Soini, Helena, 1675  
 Sokan, Amanda, 280, 450, 1640  
 Sokolosky, Marie, 235  
 Solano, Rachael, 280  
 Solberg, Lauren, 1635, 1905  
 Solberg, Laurence, 1635, 1905  
 Soldera, Cristina, 1665  
 Soliman, Elsayed, 385  
 Solomon, Diane, 1650  
 Solorzano, Nelly, 995  
 Somers, Sandie, 530  
 Somers, Virend, 650  
 Somerville, Ceara, 615, 620, 970  
 Somerville, Emily, 610, 615  
 Someya, Shinichi, 585  
 Sommerfeld, David, 1125  
 Son, Jeongyeon, 1010  
 Son, Ki, 585, 1670  
 Song, Jieun, 205  
 Song, Xiaoling, 1565  
 Song, Xiaowei, 965  
 Sonnega, Amanda, 1015  
 • Sonntag, William, 585, 965, 1615  
 • Sørensen, Silvia, 210, 315  
 Sorensen-Alawad, Amy, 1635  
 Sorin-Peters, Riva, 1675  
 Sorkin, Dara, 1820  
 Sorond, Farzaneh, 515  
 Sorvillo, Frank, 1020  
 Sosnowska, Danuta, 585, 965  
 Soto, Cyndy, 1210  
 Soulsby, Laura, 1010  
 Southall, Kenneth, 1050, 1620  
 Soyaju, Anuoluwapo, 990  
 Spainhour, Mary, 1275  
 Spalter, Tal, 1005  
 Spears, Jeff, 225, 610, 1620  
 • Spector, William, 1845  
 Speechley, Mark, 1930  
 Spencer, Beth, 1690  
 Spensley, Cathy, 1385  
 Spetz, Joanne, 1400  
 Spillman, Brenda, 1445, 2275, 2310  
 Spira, Adam, 230, 1555, 1625, 2130  
 Spira, Dominik, 2285  
 • Spiro, Avron, 120, 272, 615, 630, 1085, 1640, 2260  
 Spoelstra, Sandra, 20, 1885  
 Spoltore, Terri, 1030  
 Sprague, Briana, 675, 1660  
 Springo, Zsolt, 585  
 Spuling, Svenja, 995, 1860  
 Squires, Janet, 1155, 2290  
 Sribney, William, 2050  
 Sridhar, Ramalingam, 635  
 Sridharan, Sridevi, 800  
 Srinivasen, Erica, 1635  
 Stadnyk, Robin, 2290  
 Stahl, Sarah, 1250, 2030  
 Stajduhar, Kelli, 960  
 Stallard, P, 965, 1145, 2195  
 Stanley, Ian, 110  
 Stanley, Jennifer, 1630  
 Stanley, Melinda, 245, 1370  
 Stansbury, Kim, 660  
 Stanton, Dustin, 155  
 Stanton, Kathleen, 635  
 Stanton, Marietta, 1040  
 Stark, Susan, 610, 615  
 Starr, Julie, 1690  
 • Staudinger, Ursula, 500, 795, 1875  
 • Stawski, Robert, 30, 1085, 1630, 2140  
 Steele, Jenessa, 605  
 Steen, Jenny, 1755  
 Steenstrup, Troels, 1065  
 Steffen, Ann, 745  
 Steffens, David, 630, 1020  
 Stegemann, Sven, 1795  
 Stehouwer, Coen, 535  
 Steiger, Jeffrey, 65  
 Stein, Phyllis, 965  
 Steinert, Anika, 280, 350, 1620  
 Steinhagen-Thiessen, Elisabeth, 280, 350, 1375, 1620, 2285  
 Steinhäuser, Karen, 995  
 Steinhoff, Andreanna, 1650  
 Steinman, Bernard, 655, 1575  
 Steinman, Michael, 2110  
 Stelle, Charlie, 1705, 1745  
 Stengel, Patricia, 780  
 Stenholm, Sari, 535

- Stensland, Meredith, 240  
Stephan, Blossom, 135, 272, 1235, 1645  
Stephens, Caroline, 1455  
Stephens, Christine, 245, 1495, 2145  
• Stephens, Mary Ann, 2240  
• Steptoe, Andrew, 40, 1490  
Sterns, Gwen, 315  
• Sterns, Harvey, 5  
Sterns-Cole, Samantha, 750  
Stessman, Jochanan, 1670  
• Stevens, Alan, 220, 990  
Stevens, Alissa, 2310  
Stevens, Debbie, 2180  
Stevens, Judy, 540  
Stevens, Nan, 655, 1635  
Stevenson, Brendan, 245, 1495, 2145  
Steuerink, Nardi, 2155  
Stewart, Anita, 245  
Stewart, Norma, 210  
Stewart, S., 1680  
Stiegel, Lori, 1640  
Stillman, Chelsea, 625  
St. John, Julie, 2230  
St. John, Phil, 1020, 1040  
Stock, Steven, 1620  
Stockwell, Ian, 95  
Stoeckel, Kimberly, 970  
Stoiko, Rachel, 1625  
Stokes, Jeffrey, 725, 1650  
Stoler, Justin, 2270  
Stone, Deborah, 1215  
Stone, Katie, 215, 2060  
Stone, Mary, 2275  
• Stone, Robyn, 1075, 2210  
St. Onge, Nancy, 230  
Stoop, Annerieke, 1420  
Storelli, Elizangela, 2050  
Storey, Susan, 1505  
Storr, Carla, 625  
Stott, Kevin, 595, 1650  
Stott, Sarah, 1260, 2300  
Stowe, James, 1525, 1680  
• Straker, Jane, 190, 275, 345, 575, 1465, 1980  
Strandberg, Timo, 640, 1625  
Strath, Scott, 615  
Strauss, Eva, 1025  
• Strawbridge, William, 570  
• Street, Debra, 470, 1735  
Strehler, Kevin, 1615  
Strieder, Frederick, 225, 630, 1765  
Striler, Jamie, 1630  
Stripling, Ashley, 1625  
Strong, Jessica, 625  
• Strotmeyer, Elsa, 170, 355, 1425, 1665, 1670, 1785  
• Strough, JoNell, 1485, 1625  
Strout, Kelley, 175  
Struckmeyer, Kristopher, 225  
Struebing, Carsten, 585  
Stuart, Bruce, 665, 1050  
Stuart, Elizabeth, 1480  
Studenski, Stephanie, 265, 515, 965, 1660, 1665, 1775  
• Stum, Marlene, 655  
Stuver, Sherri, 225  
Suanet, Bianca, 665, 820  
Suarez, Elizabeth, 1550  
Sugawara, Ikuko, 590  
Sugawara, Yasuhiro, 1685  
Sugisawa, Hidehiro, 275  
Sugiyama, Mika, 272  
Suh, Yi-Jong, 900, 900  
• Sutor, J., 35, 115, 330, 1225, 1650  
Sullivan, Campbell, 1480  
Sullivan, Dennis, 370, 1040  
Sullivan, Gwynn, 1495  
Sullivan, Krystle, 1540  
Sullivan, Meg, 1835  
Sullivan, Shawn, 275  
• Sullivan-Marx, Eileen, 455  
Sumii, Hiroshi, 1690  
Sun, Daniel, 365, 1140  
• Sun, Fei, 220, 600  
Sun, Jenny, 1145, 1650  
Sun, Jiaoyuan, 210  
Sun, Xiaomin, 265  
Sundberg, Louise, 360  
Supartini, Atin, 270, 1660  
• Supiano, Mark, 1995  
Surr, Claire, 1045  
Sutherland, Olga, 1150  
Sutphin, George, 165  
Sutton, Courtney, 1620  
Suzuki, Hiroyuki, 230, 590, 620  
Suzuki, Miho, 610  
Suzuki, Rie, 610  
Suzuki, Sara, 2115  
Sveinsson, Thorarinn, 585  
Swami, Sunil, 1030  
Swan, Lawton, 1625  
Swenor, Bonnielin, 1775  
Swenson, Josh, 1630  
Swett, Laura, 1390  
Swift, Audrey, 150, 1645  
Swinkels, Jacoba, 665  
Swinnen, Aagje, 950  
Syme, Maggie, 250  
Szanton, Sarah, 20, 215, 570, 880, 1055, 1450, 2000, 2035, 2130  
• Szinovacz, Maximiliane, 225, 1650  
Szumska, Magdalena, 220, 1050
- ## T
- Taberner, Christy, 635  
Tabuchi, Megumi, 990  
Tacconi, Carlo, 1665  
Tackett, Amy, 2200  
Tadaka, Etsuko, 970  
• Taffet, George, 1700  
Tai, Ping-Shan, 655  
Takagi, Emiko, 970  
Takahashi, Masami, 245  
Takahashi, Ryutarō, 270, 290, 610, 615, 990, 1020, 1150, 1360, 1685  
Takahashi, Tomoya, 620  
Takai, Yukari, 610  
Takase, Yoshimasa, 995  
Takasuna, Yuuko, 995  
Takato, Jinro, 1660  
Takayama, Midori, 290  
Takehara, Kimie, 610  
Takeuchi, Rumi, 655  
Talley, Elizabeth, 260  
Talley, Susan, 1665  
Tampubolon, Gindo, 2135  
Tamres, Lisa, 1030, 1690  
Tamura, Bruce, 1945  
Tan, Agnes, 655  
Tan, Erwin, 780  
Tan, Hannah, 600  
Tan, Jing, 655  
Tan, Maw, 2145  
Tan, Zaldy, 665, 960  
Tanaka, Kiyoji, 260  
Taneija, Swadhin, 585  
Tang, Dan, 590  
• Tang, Fengyan, 1030, 1690  
Tang, Lu, 215, 1495  
Tang, Wenxi, 1780  
Tangchonlatip, Kanchana, 1190  
Tanh, Daniel, 1055  
Taniguchi, Yu, 272, 1015  
Tanisawa, Kumpei, 265  
Tannenbaum, Cara, 665, 1175, 1410, 1905  
Tanner, Elizabeth, 570, 1450, 1650, 1875, 2130  
Tao, Guoxin, 585  
Tappen, Ruth, 1285, 1810  
Tarantini, Francesca, 1670  
Tarantini, Stefano, 585, 965  
Tariq, Samreen, 1675  
Tarlov, Elizabeth, 665  
Tarnopolsky, Mark, 670  
Tarrat, Wassim, 1330  
Tarrant, Sarah, 272, 935  
Tate, Robert, 150, 1645  
Tatuhira, Yukiko, 1500  
Tavares, Ciro, 1575  
Tavares, Jane, 1645  
Tavernier, Béatrice, 2080  
Taylor, Brent, 1665, 1790, 2060  
Taylor, Cynthia, 260  
Taylor, Harry, 655  
Taylor, Holly, 1265  
Taylor, Jackson, 1990  
Taylor, Jame, 245, 995  
Taylor, Philip, 750  
Taylor, Tonya, 1180  
Tchalla, Achille, 585  
Tchistiakova, Ekaterina, 630  
Tchkonina, Tamara, 100  
• Teasdale, Thomas, 2075  
• Teaster, Pamela, 185, 1610, 1745  
Tedesco, Patricia, 1850  
Teerawichitchainan, Bussarawan, 1110  
Teixeira, Laetitia, 260, 1645, 1665, 2015  
Tekla, Alemnesh, 1690  
Temple, April, 665  
Temprado, Jean, 1290  
Tennen, Howard, 1020  
Teno, Joan, 95, 1185  
Teppala, Srinivas, 650, 1665  
Teresi, Jeanne, 1890  
• Teri, Linda, 155, 2045  
Tesch-Roemer, Clemens, 680, 1255, 1880  
Tesfa, Asrat, 1325  
Teshale, Salom, 620  
Teufel, James, 665  
Tewary, Sweta, 210, 2270  
Tey, Nai, 2145  
Thaler, Nicholas, 2265  
Thames, April, 2265  
Thapa, Saurja, 615, 1000, 1050, 1645  
Theeke, Elliott, 220  
Theeke, Laurie, 220  
Thein, Khin, 210  
Theou, Olga, 920  
Thianlai, Kanchana, 1190  
Thianthai, Chulanee, 1830  
Thibeau, Sheri, 995  
Thielke, Stephen, 345, 365, 505, 595  
Thierry, Amy, 1640  
Thinggaard, Mikael, 475, 1065  
Thomas, Kali, 1050, 1185, 1895  
Thomas, Lori, 1170, 2110  
Thomas, Patricia, 1640  
Thomas, S., 980  
Thomas, Tykeysha, 1015  
Thomasson, Arwin, 1295  
Thomese, Fleur, 1220  
Thomlison, Barbara, 1690  
Thompson, Carla, 265  
• Thompson, Edward, 620, 990, 1635  
• Thompson, Hilaire, 155, 1620  
• Thompson, LaDora, 285  
• Thompson, Larry, 485  
Thompson, William, 1625  
Thongterm, Pathamaporn, 1650, 2055  
Thornton, Alice, 1745  
Thorpe, Joshua, 1295, 1665  
• Thorpe, Roland, 160, 215, 300, 335, 500, 570, 590, 710, 880, 1450, 1710, 2130  
Thorsdottir, Inga, 1425  
Thorud, Jennifer, 220, 990  
Thorvaldsson, Valgeir, 630  
Thyagarajan, Bharat, 1145  
Thyrian, Jochen, 530  
Tian, Qu, 265  
Tian, Shenghuo, 1615  
Tiberio, Stacey, 1770  
Tiernan, Jennifer, 740  
Tighe, Caitlan, 1630  
Tilly, Jane, 1315  
Tilvis, Reijo, 640, 1625  
Tindle, Hilary, 1805  
Tinetti, Mary, 385  
Tinker, Anthea, 1190  
Tinsley, Liane, 1550  
Tiwari, Agnes, 1395  
Tocchi, Christine, 525  
Todd, Chris, 1575  
Todd, Michael, 1115  
Togo, Fumiharu, 625  
Toklu, Hale, 1615  
Tolea, Magdalena, 995, 2275  
Tom, Sarah, 665, 1050  
Tomita, Machiko, 635  
Tomo, Caroline, 265  
Tompkins, Catherine, 155, 1705  
Tong, Benjie, 925  
Tong, Hongmei, 1470  
Tonkikh, Orly, 920  
Toor, Sharanjit, 2295  
Tooze, Janet, 1565

- Topaz, Maxim, 240  
 Torres, Jacqueline, 1330  
 Torres, Sandra, 350  
 Torres-Gil, Fernando, 660  
 Toscani, Michael, 715  
 Toth, Marton, 585  
 Toth, Peter, 585, 965  
 Toto, Pamela, 1800  
 Touhy, Theris, 1155  
 Touron, Dayna, 625, 630  
 Towne, Samuel, 205, 220, 1655, 1845  
 • Townsend, Aloen, 215, 1050, 1920  
 Towsley, Gail, 665, 2150  
 Toyokawa, Noriko, 2055, 2140  
 Trachtenberg, Melissa, 800  
 Trahan, Maranda, 110  
 Tran, Thanh, 1050, 1955  
 Tran, Tina, 1330  
 Tranah, Gregory, 965, 2060  
 Tranton, Henry, 1630  
 Trappe, Todd, 1700  
 Travison, Thomas, 585  
 Trawinski, Lori, 430  
 Trecartin, Shannon, 1050  
 Treder, Bona, 585  
 Trejo, Laura, 650, 1055  
 Treland, Julia, 230  
 Trelfa, Michelle, 615  
 Trestman, Robert, 1540  
 Trevino, Kelly, 1640  
 Tripp, Aaron, 95, 1330  
 Trivedi, Ranak, 595  
 Troeschel, Alyssa, 1885  
 Trombetti, Andrea, 585  
 Trotta, Rebecca, 455  
 Troutman-Jordan, Meredith, 175  
 Troyer, Jennifer, 1680  
 Trudeau, Scott, 1945  
 Truong, Linda, 1785  
 Trushkova, Nina, 230  
 Tsai, Hsin-yi, 2160  
 Tsai, Jeanne, 1715  
 Tsai, Pao-Feng, 2270  
 Tsang, Tracey, 1425  
 Tsang, Yuen, 1020, 1920  
 Tschanz, JoAnn, 210, 490, 745, 1810  
 Tsui, Pat, 970  
 Tsuji, Taishi, 265, 615, 1660  
 Tsukada, Noriko, 90, 275, 655  
 Tsukuda, Ruth, 1965  
 Tsumura, Chieko, 90, 1045  
 Tsunoda, Kenji, 265, 1660  
 Tuckler, Gretchen, 460  
 Tucsek, Zsuzsanna, 585, 965  
 Tudor-Locke, Catrine, 965, 1135  
 Tulskey, James, 995  
 • Tumer, Nihal, 1615  
 Tumosa, Nina, 895  
 Tung, Ho-Jui, 890  
 Tuo, Xiping, 1695  
 Turiano, Nicholas, 120, 620, 1625, 2260  
 Turk, Dennis, 2130  
 Turk, Kristina, 60, 280, 1645  
 Turkelson, Angela, 680  
 Turner, Anne, 345, 505  
 Turner, Arlener, 1390  
 Turner, Christopher, 1495  
 Turner, Matt, 235  
 Tussing-Humphreys, Lisa, 1255  
 Twomey, Mary, 90  
 Tyas, Suzanne, 1020  
 Tyler, Denise, 275  
 Tyrrell, Caitlin, 1625  
 Tyrrell, Daniel, 2195  
 Tyrrell, Holly, 240  
 Tzourio, Christophe, 2080  
 Tzuang, Marian, 485, 1210
- U**
- Uchino, Bert, 510  
 Uchino, Seiko, 1020  
 Ueki, Shouzoh, 1660  
 Uhrlaub, Jennifer, 75  
 Ukraintseva, Svetlana, 965, 1060, 1145, 2195  
 Ulanski, Juli, 215  
 Ulatowska, Hanna, 990  
 • Umberson, Debra, 115  
 Ume, Ebere, 260, 645, 650, 1250  
 Ungvari, Zoltan, 585, 965, 1850  
 Unson, Christine, 605  
 Upadhyay, Sapana, 1680  
 Uphold, Constance, 1040  
 Ura, Chiaki, 272, 625, 985  
 Urban, Emily, 675  
 Urban, Kathy, 645  
 Usher, Barbara, 1635  
 Usher, Therri, 160  
 Usui, Kimika, 90  
 Uusi-Rasi, Kirsti, 540  
 Uygur, Mehmet, 265
- V**
- Vaes, Bert, 965, 1670  
 Vair, Christina, 210  
 Valaitis, Ruta, 635  
 Valenzuela, Michael, 1290  
 Valkeinen, Heli, 535  
 Valverde, Roberto, 2115  
 Vanasse, Alain, 875  
 Van Boxtel, Martin, 1290  
 Van Buren, Lauren, 105  
 Van Cleave, Janet, 455  
 Vandenberg, Anna, 1070, 1755  
 Vandenberg, Terry, 1910  
 Vanden Bosch, James, 2315  
 Van Den Kommer, Tessa, 2155  
 van der Berg, Julianne, 535  
 van der Leeuw, Guusje, 1675  
 van der Meulen, Erik, 320  
 Van der Pas, Suzan, 820  
 van der Poel, A., 2035  
 van der Steen, Jenny, 1030  
 Vander Weg, Mark, 630  
 Van Domelen, Dane, 1925  
 van Dongen, Sophie, 2155  
 Van Dussen, Daniel, 595, 750
- VanDyke, Melanie, 745  
 van Eijdsden, Loes, 1280  
 Vang, Suzanne, 1640  
 Van Gansbeke, Hendrik, 1280  
 van Haastregt, Jolanda, 2035  
 • Van Haitsma, Kimberly, 110, 915, 1890, 1345, 2150  
 van Hees, Vincent, 1255  
 van Heumen, Lieke, 655  
 Van Horn, Cynthia, 2195  
 Vanhoutte, Bram, 705, 1490, 2135  
 van Meurs, Joyce, 165  
 Van Ness, Peter, 340  
 Van Orden, Kim, 610, 1215  
 Vanoverschelde, Jean-Louis, 965  
 Van Pelt, Rachael, 1615  
 Van Pottelbergh, Gijs, 965, 1670  
 Van Regenmortel, Sofie, 855, 990, 1680  
 Van Remmen, Holly, 265  
 van Riesenbeck, Isabelle, 610, 1140  
 van Rossum, Erik, 145, 420, 545, 1245, 2035  
 Van Solinge, Hanna, 1010  
 • van Tilburg, Theo, 655, 820, 1220  
 Varadhan, Ravi, 1480, 1930  
 Varghese, Mathew, 485  
 Varghese, Rekha, 2295  
 Vasilievskis, Eduard, 920  
 Vasilopoulos, Terrie, 1895  
 Vasquez, Elizabeth, 272, 650  
 Vasquez, Priscilla, 615, 1125  
 Vasunilashorn, Sarinnapha, 2195  
 Vaughan, Leslie, 215  
 Vaupel, James, 1065  
 Vega, William, 2050  
 Velasco, Teonette, 520  
 Vélez-Egipciano, Joel, 1710  
 Veloso, Antonio, 965, 1575  
 Venkataraman, Saraswathy, 660  
 Verbeek, Hilde, 210, 420, 545, 1280, 1420  
 Vergote, David, 965  
 Vermeulen, Joan, 635  
 Vernikos, Joan, 1570  
 Versey, Shellae, 880  
 Verschuren, Monique, 1290  
 Verté, Dominique, 235, 855, 990, 1045, 1205  
 Verté, Emily, 650, 990, 1045, 1205  
 Vesnaver, Elisabeth, 1150  
 Vestergaard, Sonja, 360  
 Vicaria, Isha, 840  
 Vickerstaff, Sarah, 470, 1735  
 Vickrey, Barbara, 960  
 Victor, Christina, 40, 970  
 Vidal, Christopher, 585  
 Vidoni, Eric, 1360  
 Vieira, Gisele, 265, 1020  
 Viljanen, Anne, 645  
 Villa, Marcia, 600  
 • Villa, Valentine, 660  
 Villanueva, Carolina, 415
- Vincenzo, Jennifer, 1425, 1660, 1665  
 Vinik, Aaron, 355  
 Vinik, Etta, 355  
 Vinson, Latrice, 990  
 Viola, Deborah, 1005  
 Visnic, Stephanie, 2045  
 Visser, Marjolein, 535, 1565, 1665, 1860, 2155  
 Vitak, Karen, 640  
 • Vitiello, Michael, 715, 2060  
 Vitolins, Mara, 1015  
 Vittinghoff, Eric, 1540  
 Vizey, Katie, 605  
 Vlachantoni, Athina, 240, 275, 1055, 1535  
 Vogel, Asmus, 272  
 Vogel, Claudia, 680, 1880  
 Vogel, Nina, 1880  
 Vogelsmeier, Amy, 1430  
 Vogt, H., 1530  
 • Volicer, Ladislav, 1030  
 • Volpi, Elena, 1195  
 Voltmer, Jan-Bennet, 1010  
 Von Ah, Diane, 1505  
 von Humboldt, Sofia, 620, 995  
 von Oertzen, Timo, 840  
 von Strauss, Eva, 2275  
 Voss, Peggy, 1875  
 Voytek, Joseph, 750  
 Vradenburg, George, 2090  
 Vu, Catherine, 1055  
 Vu, Kinh, 1640
- W**
- Wachen, Jennifer, 1625  
 Wacker, Robbyn, 5  
 Wada, Tadashi, 90  
 Wade, Michael, 210  
 Wade-Whitehead, Janice, 2180  
 Wadley, Virginia, 2245  
 Wagner, Diane, 615  
 • Wagner, Donna, 1050  
 Wagner, Gert, 1880, 2255  
 Wagner, Jenny, 1625, 2260  
 Wagner, Lisa, 1625  
 Wagner-Felkey, Joleen, 1995  
 Wagster, Molly, 515  
 • Wahl, Hans-Werner, 230, 315, 465, 605, 1385, 1605, 1620, 1750, 2025  
 • Waite, Linda, 45  
 Wajnberg, Ania, 2000  
 Wakefield, Dorothy, 1540  
 Wakui, Tomoko, 495, 600, 1685  
 Wald, Heidi, 920  
 Waldboth, Veronika, 1580  
 Waldinger, Robert, 1085  
 • Waldrop, Deborah, 1050, 1690  
 Walia, Meenal, 1030  
 Walker, Bronda, 905  
 Walker, Logan, 585  
 Walker, Ruth, 250, 600  
 Walker, Ryan, 275, 1465  
 Walker, Sandra, 980  
 Wall, Melanie, 985  
 Wallace, Robert, 665  
 • Wallace, Steven, 660, 1330

- Wallemacq, Pierre, 1670  
Wallen, Jacqueline, 1300, 1590  
Wallet, Shannon, 965  
• Wallhagen, Margaret, 570, 1675  
Walsh, Judith, 1680  
Walsh, Kieran, 730, 1220, 1685  
• Walston, Jeremy, 100, 585, 925, 1145, 1195  
Walter, Kelsey, 1595  
Wan, Wylie, 605, 700, 1490  
Wanagat, Jonathan, 1615  
Wang, Chen-Pin, 270, 370  
Wang, Dahua, 590  
Wang, Diana, 155, 970, 2270  
Wang, Dongmin, 615  
Wang, J., 1145  
Wang, Joyce, 272  
Wang, Kaipeng, 2115  
Wang, Lin, 1695  
Wang, Lucy, 365  
Wang, Shaohung, 1015  
Wang, Shuangshuang, 225, 280  
Wang, Tao, 1930  
Wang, Wei, 1365  
Wang, Yi, 665  
Wang, Yikun, 635  
Wang, Yuanjia, 1020  
Wang, Zhi-wen, 1055  
Wang-Hsu, Elizabeth, 1670  
Warburton, Jeni, 855, 1685  
Ward, Christopher, 270  
Ward, Rachel, 355, 1560, 1670, 2070  
Wargo, Catherine, 1870  
Waring, Molly, 230  
Warner, Camille, 605, 1650, 1655  
Warner, David, 325  
Warner, Lisa, 1860  
Warner, Margaret, 1950  
Warren-Findlow, Jan, 1630, 1675  
Washburn, Allyson, 230, 890  
Washington, Karla, 510, 1050, 1515  
Washington, Tiffany, 750, 1955  
Wassel, Janice, 345  
Waszynski, Christine, 920  
Watanabe, Chie, 260  
Watanabe, Daisuke, 275  
Watanabe, Yuichi, 660  
Waters, Leland, 895, 1270, 1635, 1905  
Watkins, Ivan, 350, 2160  
Watkins, Jillian, 1980  
Watkins, John, 1745  
Watson, Jennifer, 1810  
Watson, Rebecca, 1020  
Watson, Wendy, 1705, 1745  
Watts, Amber, 2300  
Weaver, Andrea, 1635  
Weaver, Bruce, 975, 1525  
Weaver, Michael, 1650  
Weaver, Raven, 1055, 1650  
Webster, Noah, 130, 680, 1075, 1075  
Weech-Maldonado, Robert, 205, 215, 445, 1050, 1105, 1690, 2095  
Weeks, Lori, 2290  
Wegner-Siegmundt, Christian, 980  
Wehrspann, Elizabeth, 610  
• Wei, Jeanne, 585  
Wei, Rongrong, 235  
Wei, Yu-Jung, 1295  
Weil, Joyce, 1325  
Weimer, David, 1820  
Weinstein, Maxine, 45  
Weir, David, 2100  
Weiss, Aner, 540  
Weiss, Carlos, 1480  
Weiss, David, 1875  
Weiss, Joan, 1055  
Welch, Alexis, 905  
Welch, Lauren, 365  
Welleford, Andrew, 272  
• Welleford, E., 225, 610, 1010  
Wen, Ming, 875  
Wen, Xin, 1630  
Wendel, Carrie, 1330  
Weng, Hui-Ching, 240, 1105  
Wengreen, Heidi, 1810  
Wennberg, Alexandra, 230  
• Werner, Perla, 1755  
Werner, Rachel, 1820  
Wernher, Iris, 1050  
Wertheimer, Anne, 75  
Wertman, Annette, 260  
Wessel, Claire, 420  
Westbrook, Reyhan, 585  
Westerhof, Gerben, 1635  
• Wetherell, Julie, 500, 1920  
Wetherington, Christopher, 1525  
Wettstein, Markus, 230, 1385  
Wetzel, Martin, 505  
Weuve, Jennifer, 235  
Wheeler, Emma, 895, 1635  
White, Karessa, 585  
White, Katherine, 315  
White, Martin, 1935  
Whitehead, Brenda, 1630, 1770  
• Whitfield, Keith, 215, 300, 1640  
• Whitlatch, Carol, 865, 2150, 2180  
Whitley, Deborah, 735  
Whitman, Debra, 785  
Whitney, Mary, 595, 1755  
Whitson, Heather, 170  
Whyne, Erum, 1640  
Wiatrek, Dawn, 1885  
Wiatr-Rodriguez, Amy, 1810  
Wickrama, Kandauda, 1035  
Wiebe, Jamie, 630  
Wiebe, Sandra, 625, 965, 995  
• Wiener, Joshua, 1165, 1435, 2310  
Wiese, Lisa, 1810  
Wiest, Maja, 995, 1860, 1880  
Wight, Richard, 250, 1540  
Wihry, David, 1665, 1680  
• Wilber, Kathleen, 660, 1005, 1610  
Wilbur, JoEllen, 615  
Wilby, Frances, 225, 610, 1620  
Wilcock, Donna, 1700  
Wild, Katherine, 50, 1360, 1415  
Wildman, John, 1105  
Wiley, Dorothy, 1025  
Wilkin, John, 1465  
Wilkinson, Lindsay, 1640  
Wilks, Scott, 220, 1050  
Willard, Sarah, 635  
• Willcox, Bradley, 150, 965, 1500  
Willcox, Donald, 150, 965, 1500  
Willemse, Bernadette, 420, 530  
Williams, Aelwyn, 1230  
Williams, Beverly, 1945  
Williams, Brie, 2200  
Williams, Caitlin, 1630  
• Williams, Christine, 1810  
Williams, Courtney, 1295  
Williams, Emily, 595  
Williams, Emmanuel, 585  
Williams, Jordan, 105, 610, 625  
• Williams, Kristine, 970  
Williams, Monique, 1710  
Williams, Sarah, 1635  
Williams, Sonja, 1025  
Williams, Susan, 230, 890  
Williams, Thomas, 225  
• Williamson, Gail, 1115  
Williamson, Jeff, 1135, 1640  
• Williamson, John, 665  
Williamson, Megan, 1765  
Williams Robinette, Jennifer, 2255  
Willis, Robert, 1010  
• Willis, Sherry, 30, 1555  
Wilm, Stefan, 1580  
• Wilmoth, Janet, 1085  
Wilmoth, Joe, 605  
Wilson, Graeme, 980  
Wilson, Guy, 1290  
Wilson, John, 1020  
Wilson, Keren, 660  
• Wilson, Nancy, 1370, 1580  
Wilson, Robert, 615  
Wilson, Ryan, 785  
Wilson, Stephanie, 2240  
Wilson, Tomorrow, 1640  
Wilson-Genderson, Maureen, 150, 875, 995  
Windle, Gill, 1230  
Wink, Paul, 1095  
Winning, Ashley, 2255  
Winstead, Vicki, 720  
Winter, Beth, 1230  
Winter, Sandra, 915  
Wintermute, Timothy, 1840  
Winters-Stone, Kerri, 585  
Wion, Rachel, 1970  
Wirth, Elizabeth, 455  
Wise, Jocelyn, 1270  
Wise, Meg, 410  
Wiseman, Hilary, 565, 1075, 1840  
• Witten, Tarynn, 560  
Wittich, Walter, 1050  
Wohland, Pia, 1235  
Wolf, David, 1285  
• Wolf, Douglas, 2275  
Wolfe, Pamela, 1615  
Wolff, Jennifer, 1445, 2130, 2305  
Wolff, Julia, 1255, 1860  
Wolford, Monica, 1025  
Wolf-Ostermann, Karin, 530  
• Wolinsky, Fredric, 630, 665  
Won, Seojin, 935  
Wong, Bob, 665  
Wong, Gillian, 265  
Wong, Gloria, 685, 1055, 1870  
Wong, Jen, 2175  
Wong, Karen, 1250  
Woo, Namhyun, 1665  
Wood, Stacey, 665  
Woodard, John, 1625  
Woodby, Lesa, 1945  
Woods, Angela, 980  
Woods, Diana, 635  
Woods, Nancy, 525, 965, 1405  
Woodward, Amanda, 95  
Woolrych, Ryan, 425  
Woolverton, Nancy, 2140  
Woodsley, Julie, 980  
Wortmann, Marc, 485  
Wozniak, Dagmara, 620  
Wray, Laura, 210  
• Wray, Linda, 630, 1640  
Wray, Walter, 1130  
Wright, Angela, 1425  
Wrightsman, Stephanie, 780  
Wrosch, Carsten, 15  
Wruck, Lisa, 775  
Wrzus, Cornelia, 1100, 2255  
• Wu, Bei, 195, 1015, 1275  
Wu, Chenkai, 1085, 2140  
Wu, Deqing, 965, 1060, 2195  
Wu, Frederick, 650  
Wu, Lindsay, 585  
Wu, Shinyi, 240, 1680  
Wu, Shwu-Chong, 1045  
Wu, Treena, 660  
Wu, Yow-Wu, 265  
Wu, Yu-Tzu, 1605  
Wuchenich, John, 1025  
Wurm, Susanne, 995, 1255, 1860, 1875  
Wüstemann, Henry, 1375  
Wustmann, Sarah, 272  
• Wyman, Jean, 260  
Wysocki, Andrea, 205, 1185, 1820

**X**

- Xiao, Luo, 1780, 1925  
Xie, Bo, 350, 2160  
Xie, Lili, 1470  
Xinyang, Yu, 585  
Xiong, Phia, 650  
Xu, Beibei, 635  
Xu, Dongjuan, 1025  
Xu, Hao, 1695  
Xu, Jing, 1050  
Xu, Ling, 755, 1720

Xu, Ping, 275, 605, 1645, 1650  
Xu, Qingwen, 160  
Xue, Qian-Li, 1450, 1930

## Y

Yabushita, Noriko, 260  
Yaffe, Kristine, 775, 965, 1020, 1030, 1540, 1805, 2060  
Yakobus, Yuliana, 585  
Yamamoto-Mitani, Noriko, 90, 610  
Yamanaka, Katsuo, 1520  
Yamashita, Takashi, 1010, 1645, 2105  
Yamazaki, Sachiko, 1020  
Yan, Elsie, 1395  
Yancura, Lorigena, 735, 1730, 2020  
Yang, Po, 1685  
Yang, Ting, 875  
Yang, Xiaoling, 1615  
Yang, Yiqing, 2275  
Yanguas, Javier, 615  
Yarry, Sarah, 625, 2010  
Yasar, Sevil, 1930  
Yashin, Anatoliy, 965, 1060, 1145, 2195  
Yasumura, Seiji, 1020  
Yasunaga, Masashi, 230, 655, 1665  
Ye, Minzhi, 990, 1260  
Yeagers, Jon, 50  
Yefimova, Maria, 635, 1015  
Yeh, Charlotte, 1015  
Yen, Glorian, 630  
Yens, David, 610  
Yeo, Younsook, 350  
Yeom, Hyun-e, 590  
Yerges-Armstrong, Laura, 2285  
Yeung, Dannii, 1715  
Yijiao, Wang, 585

Yin, Shufei, 980  
Yin, Zhaoxue, 1110  
Yokoyama, Yuri, 1015  
Yolpant, Wichiya, 645, 1020  
Yon, Yongjie, 1005  
Yonashiro-Cho, Jeanine, 1610  
Yoo, Jeong-Ah, 1615  
Yoo, Yeonsoo, 700  
Yoon, Hyunsook, 625  
Yoon, Hyunwoo, 215, 280, 980, 1620, 1680, 1910, 2265  
Yoon, Ju, 1020, 1045  
Yoon, WonAh, 1055  
Yorgason, Jeremy, 55, 595, 700, 1650  
Yoshida, Hideyo, 230, 270, 590, 620  
Yoshida, Hiroto, 272, 1660  
Yoshida, Ichiko, 1020  
Yoshie, Satoru, 995  
Yoshiyuki, Noriko, 1045  
Yost, Elizabeth, 720  
Youm, Yoosik, 970, 1625, 1920  
Young, Heather, 765  
Young, Lynne, 1660  
Young, Megan, 1635  
Young-Clark, Iris, 1035  
Yu, Chia-Wen, 655  
Yu, Kai, 272, 650, 1695  
Yu, Lei, 890  
Yu, Zhiyuan, 1045  
Yuen, William, 630

## Z

Zaffarana, Nicoletta, 1030, 1665  
Zagorin, Aleksandra, 2280  
Zahodne, Laura, 985  
Zajacova, Anna, 1110, 1725, 2040

Zakoscielna, Karolina, 105, 610  
Zammit, Andrea, 272  
Zanibbi, Katherine, 315  
Zaniello, Benjamin, 75, 1990  
Zanjani, Faika, 375, 375, 1555, 1745  
• Zarit, Steven, 115, 220, 485, 600, 865, 1240, 1370, 1510, 1630, 1640, 1650, 2030  
Zaslavsky, Oleg, 525, 920, 1405  
Zatz, Mayana, 260  
Zauszniewski, Jaclene, 645, 735, 1020, 1650, 2055  
Zautra, Alex, 15  
Zavala, Catalina, 2220  
Zecevic, Aleksandra, 1685, 1690  
Zee, Jarcy, 1020  
Zee, Phyllis, 715  
Zekry, Dina, 360  
Zelano, Giovanni, 230  
Zeng, Linxiang, 640  
Zeng, Yi, 1110  
Zengul, Ferhat, 445  
Zettel-Watson, Laura, 1620  
Zhan, Yilei, 385  
Zhang, Fan, 980  
Zhang, Manrui, 245, 755, 830, 985, 1390, 1625, 1640, 1855  
• Zhang, Ning, 265  
Zhang, Qiuying, 665  
Zhang, Tian, 585  
Zhang, Ting, 230  
Zhang, Weiguang, 1035  
Zhang, Xiaomin, 585  
Zhang, Xin, 1640  
Zhang, Yalu, 660, 1050  
Zhang, Yangqing, 970  
Zhang, Ye, 195  
Zhang, Yiqiang, 265  
Zhang, Yuan, 1010

Zhang, Zhanjun, 230  
Zhang, Zhenmei, 195, 1720  
Zhao, Qianhua, 1275  
Zhao, Shibe, 2045  
Zhao, Xin, 272, 650, 1695  
Zhen, Yingliu, 755, 830, 985  
Zheng, Hui, 1110  
Zheng, Robert, 280, 595, 1620  
Zhu, Carolyn, 455, 1655, 1845  
Zhu, Kaiqiang, 635  
Zhu, Xinyi, 980  
Ziegelmann, Jochen, 225, 1255, 1860  
Zielinski, Jill, 1150  
Zijlstra, G. A., 145, 315, 320, 1245, 2035  
Zillikens, M, 2285  
Ziminski Pickering, Carolyn, 20  
Zimmer, Gary, 210  
Zimmer-Gembeck, Melanie, 1900  
• Zimmerman, Sheryl, 940, 1955  
Zinn, Jacqueline, 1165  
Zipunnikov, Vadim, 1780, 1925  
Zisberg, Anna, 525, 920, 1755  
Zivin, Kara, 1020, 2170, 2305  
Zivkovic, Sasa, 355  
Zmuda, Joseph, 1550  
Zonderman, Alan, 880  
Zuckerman, Ilene, 1020, 1295, 1920, 1950  
Zúñiga, Franziska, 545  
Zuo, Qon, 235  
Zurlo, Karen, 705, 1055, 1685  
Zwakhalen, Sandra, 210  
• Zweig, Richard, 625
